# Supplementary material for: Extensive Families of miRNAs and PHAS Loci in Norway Spruce Demonstrate the Origins of Complex phasiRNA Networks in Seed Plants
Source: PubMed Central journal article supplement — Mol Biol Evol. 2015 Aug 26;32(11):2905–18. doi: 10.1093/molbev/msv164 (PMC4651229; doi:10.1093/molbev/msv164), 2015-08-26

NAME: pab-miR11402  
SEQ:AGTTGGGAGCCTGACAGGCCT  
LENGTH: 21

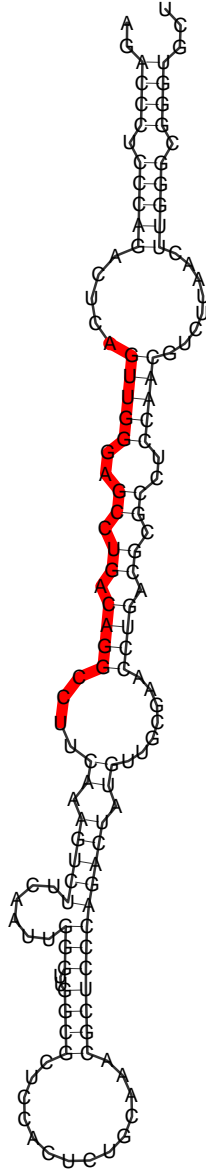

NAME: pab-miR11403  
SEQ: TTAAATGAGATGACTGTCA  
LENGTH: 20

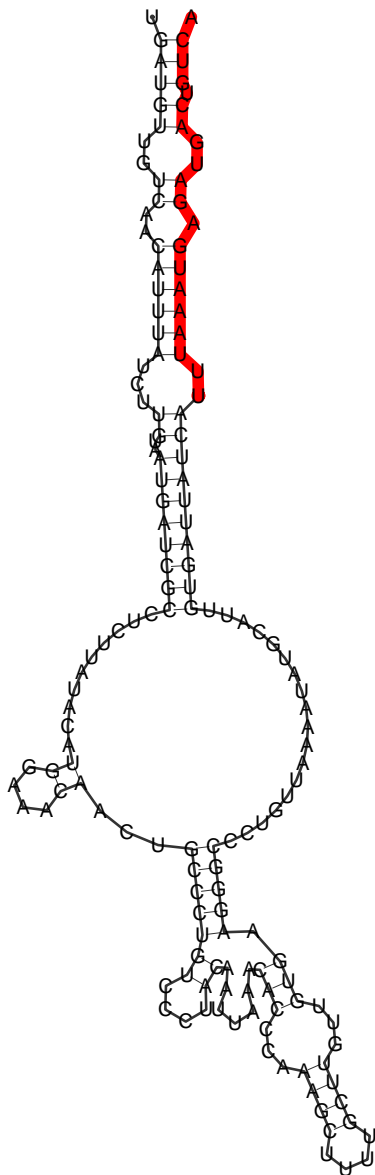

NAME: pab-miR11404  
SEQ:TCGTGATAGGGATATACTGAA  
LENGTH: 21

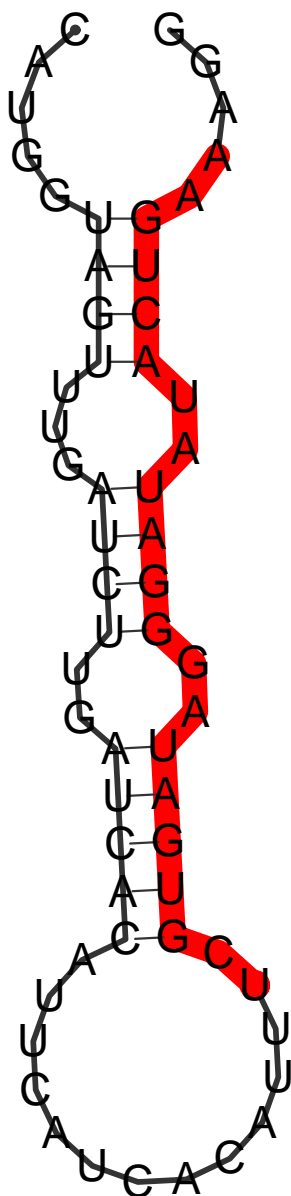

NAME: pab-miR11405  
SEQ: TTGACCAAGTTGGAGATGATC  
LENGTH: 21

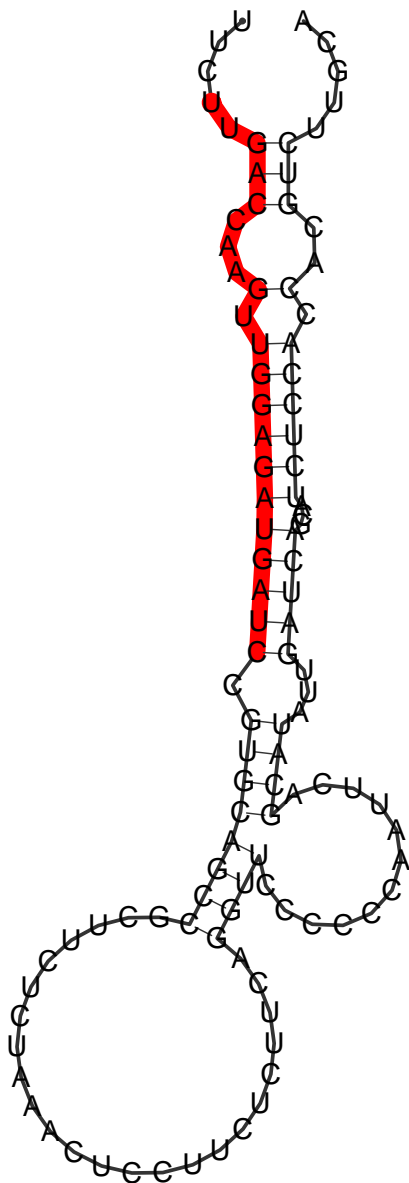

NAME: pab-miR11406  
SEQ: TTGACCAAGTTGGAGATGATC  
LENGTH: 21

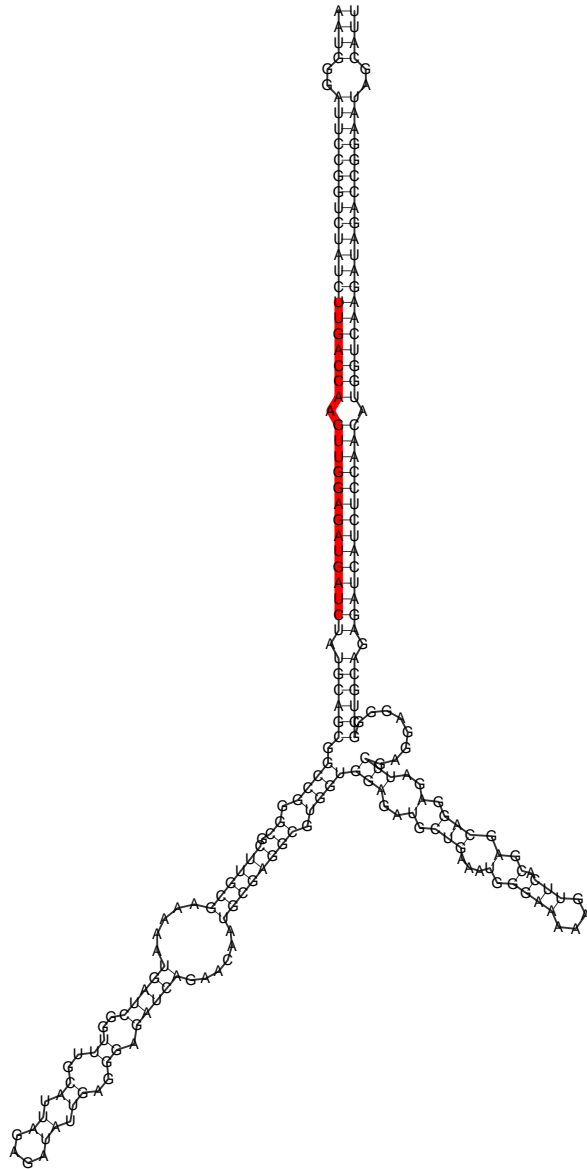

NAME: pab-miR11407a  
SEQ:AAAAC TCTGCGAGCGTCAACC  
LENGTH: 21

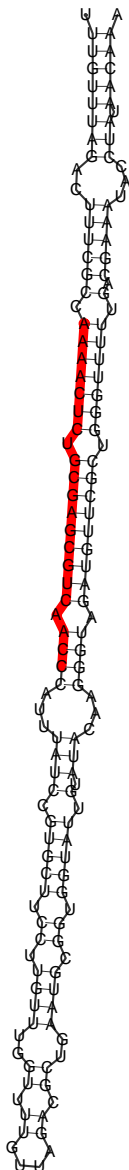

NAME: pab-miR11407b  
SEQ:TCGAAAACCTCTGCGAGCGTCT  
LENGTH: 21

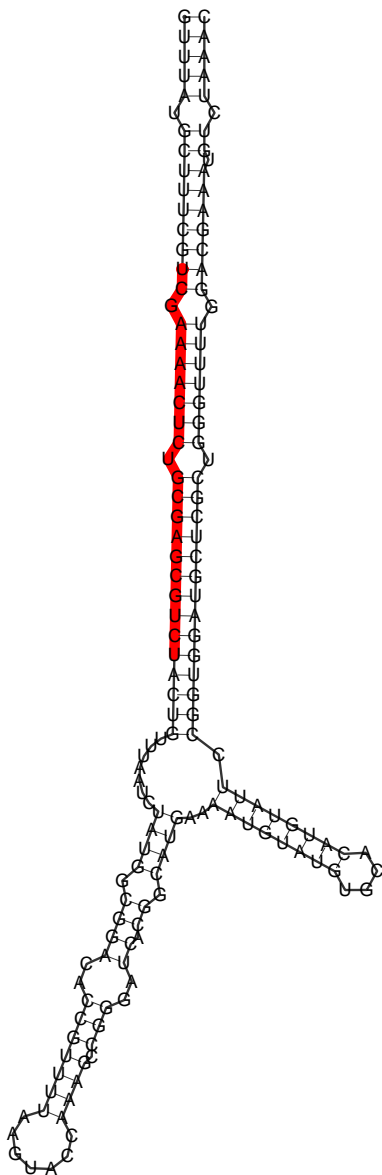

NAME: pab-miR11408a  
SEQ:AAAGCTGGGTCTGATGTGCACC  
LENGTH: 22

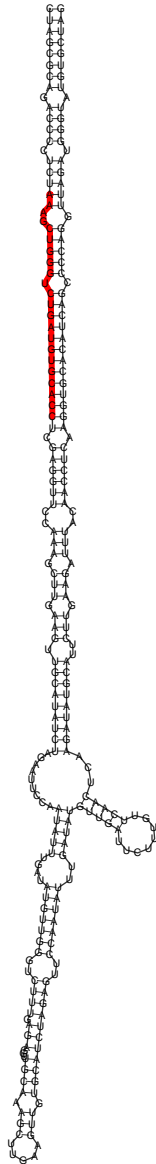



NAME: pab-miR11408b-3p  
SEQ: CATTTCGGACTTGGTTTTAGA  
LENGTH: 21

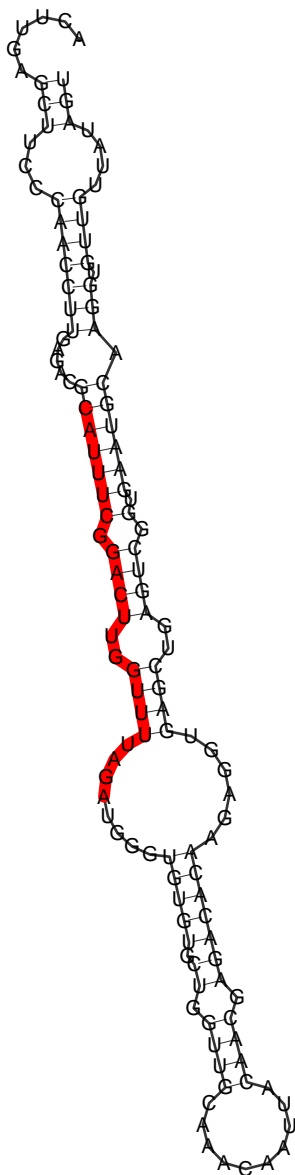



NAME: pab-miR11408c  
SEQ:TAATCTCGGGTCTGATATTCC  
LENGTH: 21

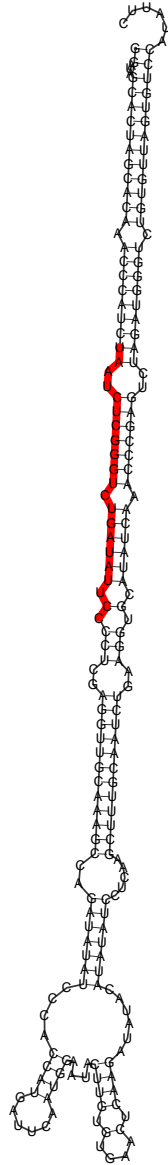

NAME: pab-miR11409a  
SEQ:AACCCCGGATCTATCAAGCTC  
LENGTH: 21

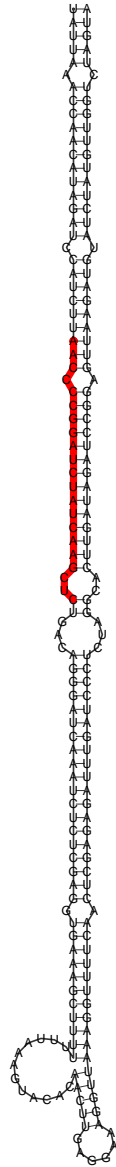

NAME: pab-miR11409b  
SEQ:ATATTTGATCCCTCTTGCGC  
LENGTH: 21

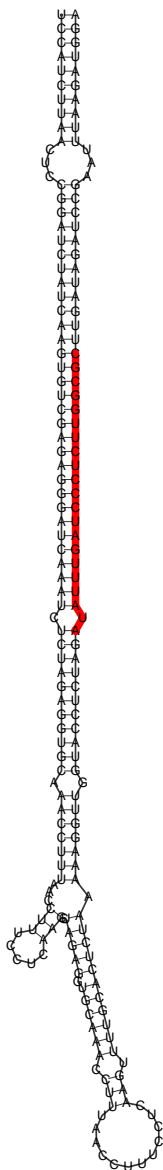



NAME: pab-miR11409d  
SEQ: CATTGACCCCTTTGAGCACT  
LENGTH: 21

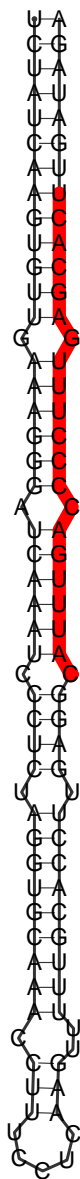

NAME: pab-miR11409e  
SEQ: TTA ACTCCGGATCTATTATGC  
LENGTH: 21

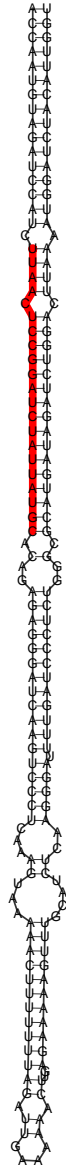



NAME: pab-miR11409f  
SEQ: TTGATAGATCCATAGGTAAGT  
LENGTH: 21

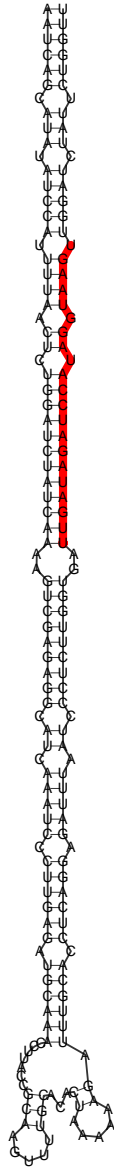



NAME: pab-miR11410  
SEQ:AAGAGGCCGAGTAAACATAGG  
LENGTH: 21

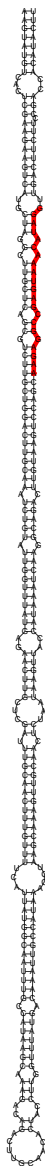

NAME: pab-miR11411a  
SEQ:AAGCCCAGATCTGTAGATTTC  
LENGTH: 21

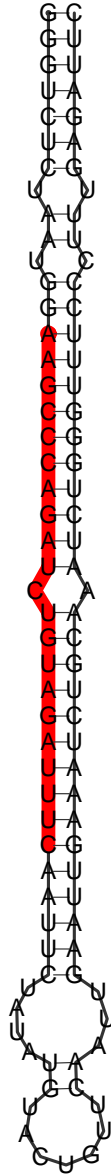

NAME: pab-miR11411b  
SEQ:GGTAAATTGTCTTGGCACAG  
LENGTH: 21

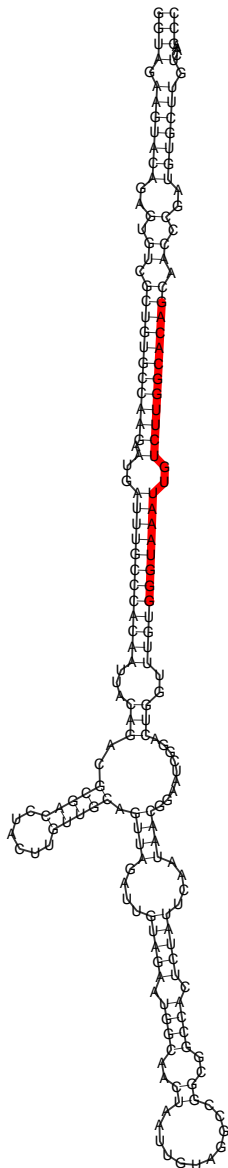

NAME: pab-miR11411c  
SEQ: TGAAATCTGCAAATCTGGGTT  
LENGTH: 21

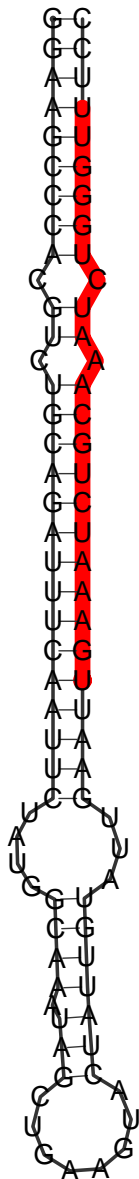

NAME: pab-miR11411d  
SEQ: TGAAATCTGCAAATCTGGGTT  
LENGTH: 21

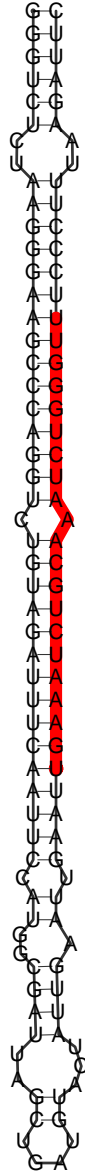

NAME: pab-miR11412  
SEQ:AAGTGGGGGCGCTGGCAGACTG  
LENGTH: 22

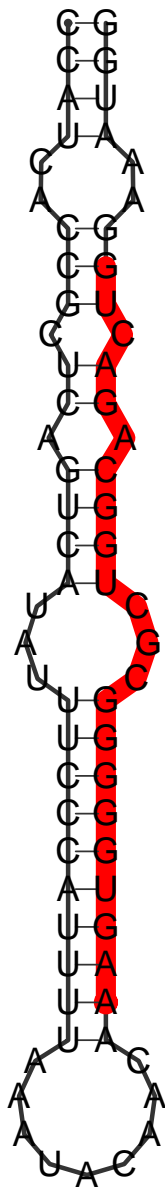



NAME: pab-miR11413a  
SEQ:AATCCCAATTCGAAGATACCG  
LENGTH: 21

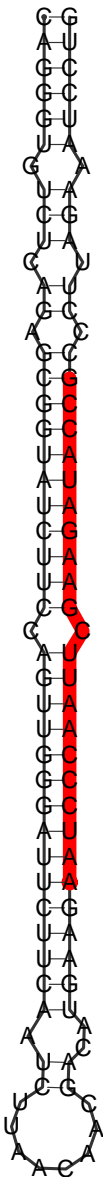

NAME: pab-miR11413b  
SEQ: CATCCCAATTTGAAGATACCG  
LENGTH: 21

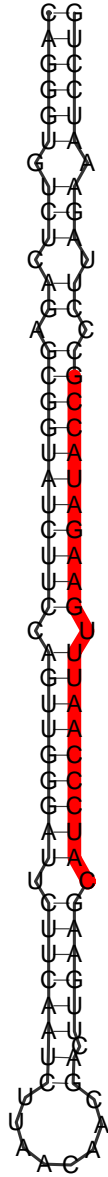

NAME: pab-miR11414  
SEQ:AATTTTCATCAATCTTGTCGGA  
LENGTH: 21

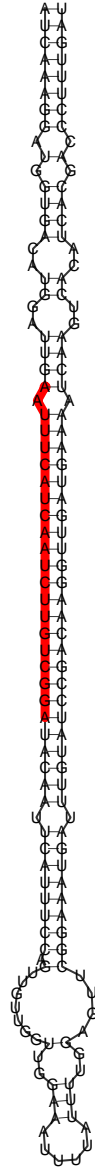

NAME: pab-miR11415  
SEQ:AATTTGGTCTTCTCGGAAGGC  
LENGTH: 21

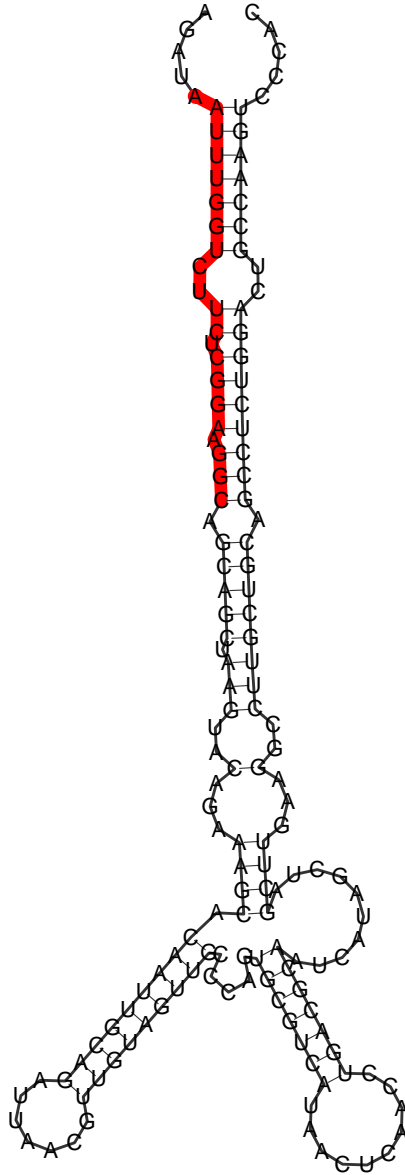

NAME: pab-miR11416  
SEQ:ACACGGATTTGGGATGTGTCC  
LENGTH: 21

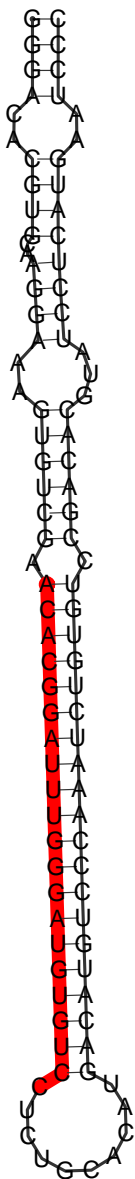

NAME: pab-miR11417-3p  
SEQ: ACCATGTGTCGACAAATGATT  
LENGTH: 21

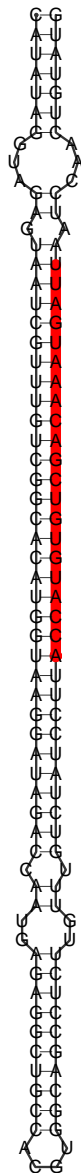

NAME: pab-miR11417-5p  
SEQ:TCGTTTGTCTGGCACATGGTAA  
LENGTH: 21

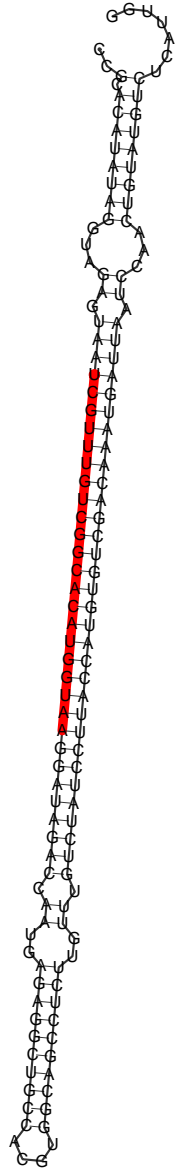

NAME: pab-miR11418  
SEQ:ACCCACCGCCGCTGCCGCCGC  
LENGTH: 21

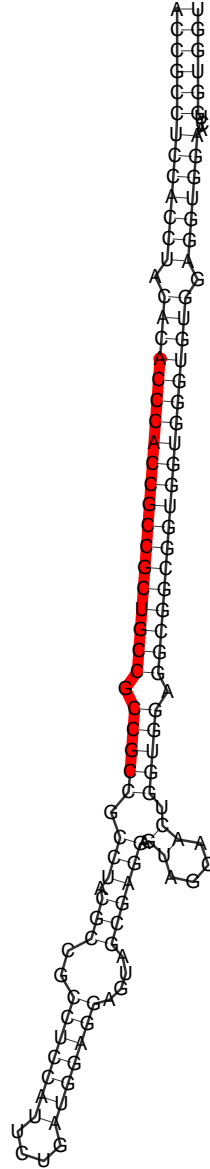



NAME: pab-miR11419  
SEQ:ACCTAAACTGCTCAAACACTG  
LENGTH: 21

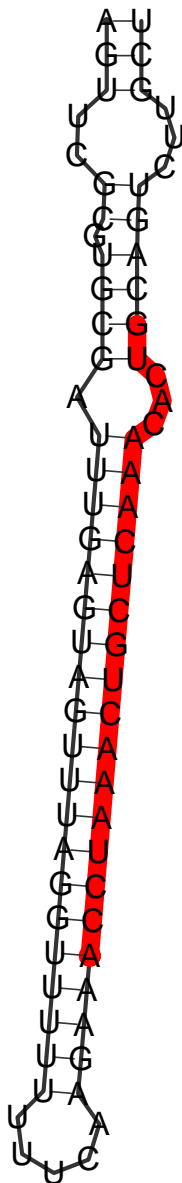



NAME: pab-miR11420b  
SEQ:GCGCGATTCCGTCATAAACCG  
LENGTH: 21

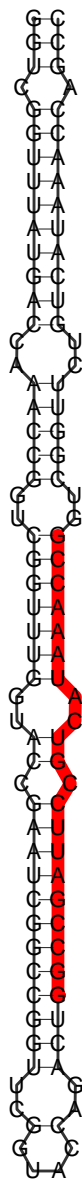

NAME: pab-miR11420c  
SEQ:TCGGAGGACCGGTCTGGTACC  
LENGTH: 21

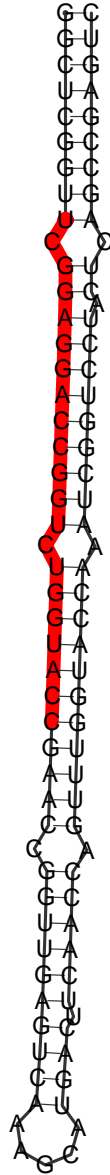

NAME: pab-miR11420d  
SEQ: TTGGTACCGAACCGGCTGAGT  
LENGTH: 21

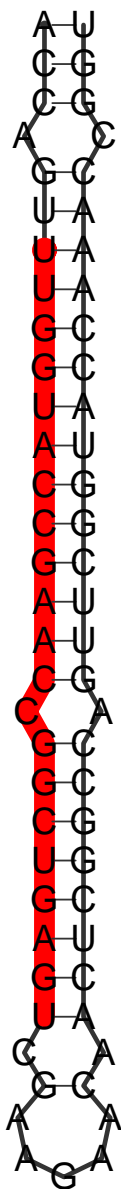

NAME: pab-miR11420e  
SEQ: TTGGTACCGAACCGGCTGAGT  
LENGTH: 21

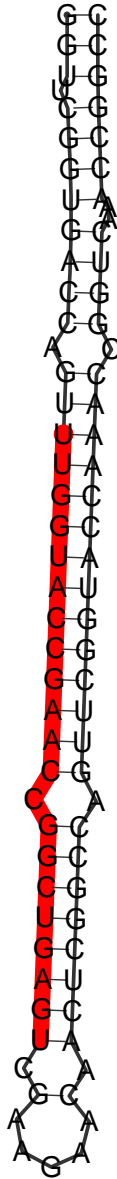

NAME: pab-miR11420f  
SEQ: TTGGTACCGAACCGGCTGAGT  
LENGTH: 21

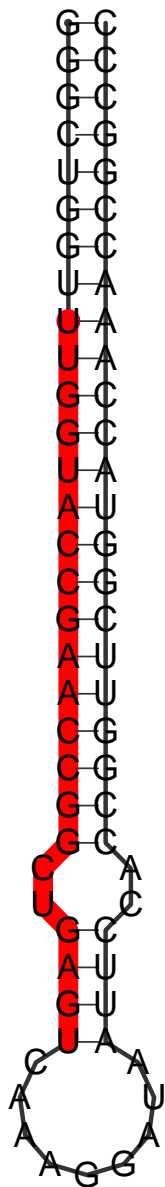





NAME: pab-miR11421-3p  
SEQ: CACCAGAGCTCACAAGAGTGG  
LENGTH: 21

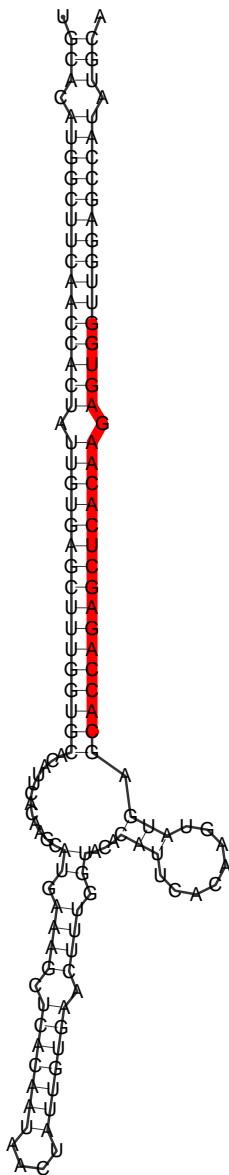

NAME: pab-miR11421-5p  
SEQ:ACTATTGTGAGCTTTGGTGCA  
LENGTH: 21

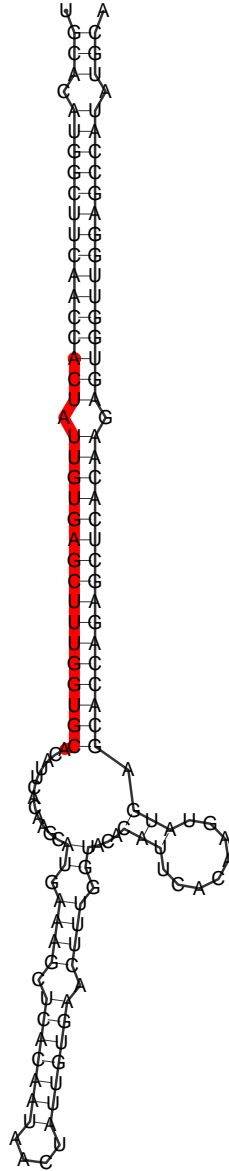

NAME: pab-miR11422a  
SEQ:ACTCAGTAATGTGCTTTTGGGA  
LENGTH: 21

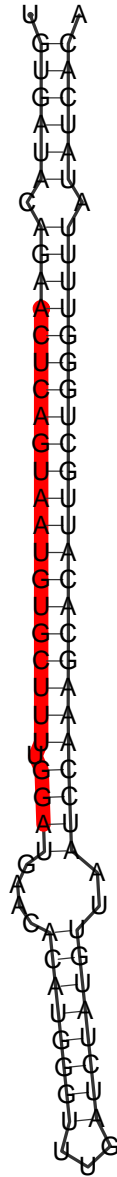

NAME: pab-miR11422b-3p  
SEQ:TGAAGCACATTGTTGGGTTTC  
LENGTH: 21

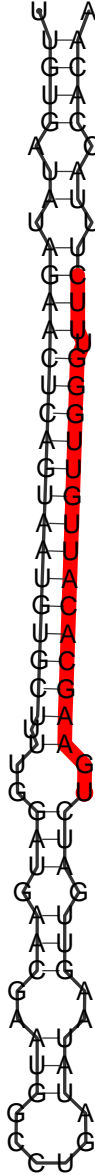

NAME: pab-miR11422b-5p  
SEQ:ACTCAGTAATGTGCTTTTGGGA  
LENGTH: 21

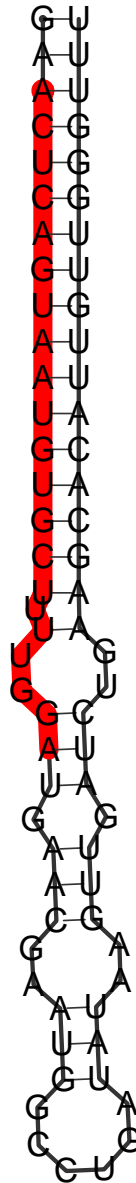

NAME: pab-miR11423a  
SEQ:ACTGGGAAACGTCGTCGGCCGT  
LENGTH: 22

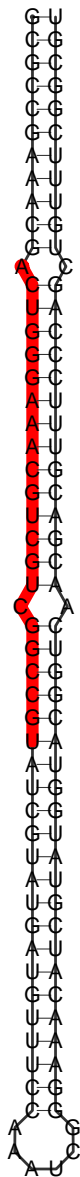

NAME: pab-miR11423b  
SEQ:CGAGAAACGTCGCCGGTCGTA  
LENGTH: 21

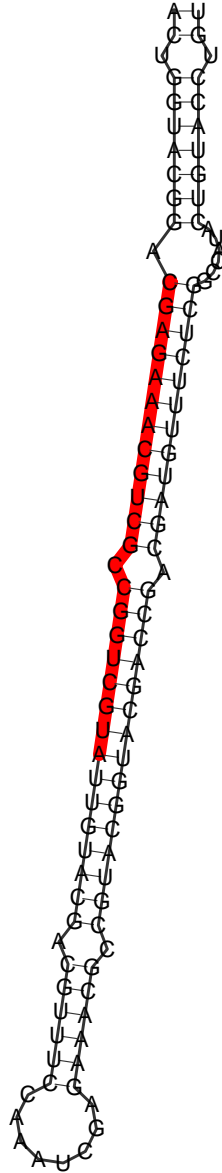

NAME: pab-miR11423c  
SEQ:CGAGAAATGTCGCCGGTCGTA  
LENGTH: 21

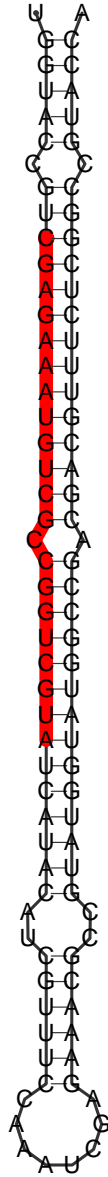





NAME: pab-miR11423e  
SEQ:CGGCCAACAGCGTTTCGGGGC  
LENGTH: 21

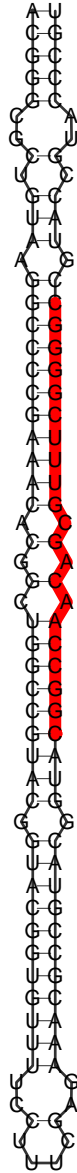

NAME: pab-miR11423f  
SEQ:CGGCCAACAGCGTTTCGGGGC  
LENGTH: 21

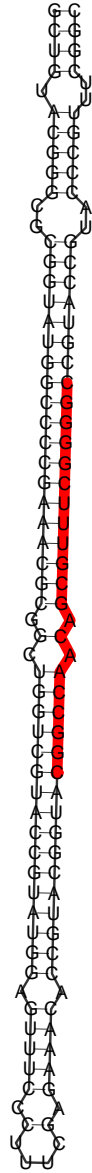

NAME: pab-miR11423g  
SEQ:CGGCCAGCAGCGTTTCGGGGC  
LENGTH: 21

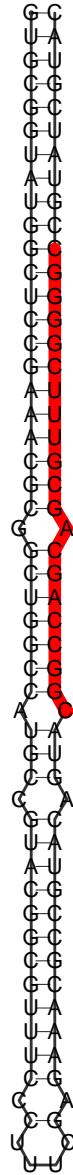

NAME: pab-miR11423h  
SEQ:CGGCCAGCGGCGTTTCGGGGC  
LENGTH: 21

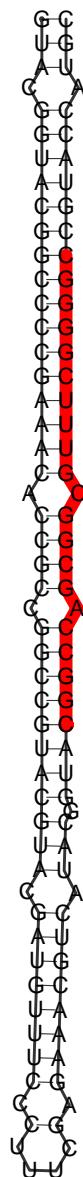

NAME: pab-miR11423i  
SEQ:CGGCCGGTGGCGTTTCGGGGC  
LENGTH: 21

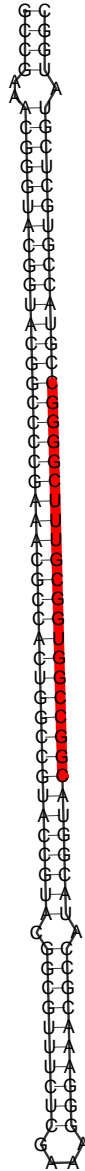

NAME: pab-miR11423j  
SEQ:CGGCTAGCAGCGTTTCGGGGC  
LENGTH: 21

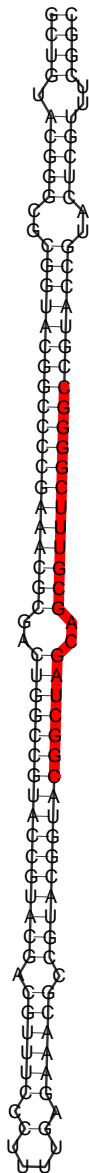

NAME: pab-miR11423k  
SEQ:CGGTCAATGGCGTTTCGGGGC  
LENGTH: 21

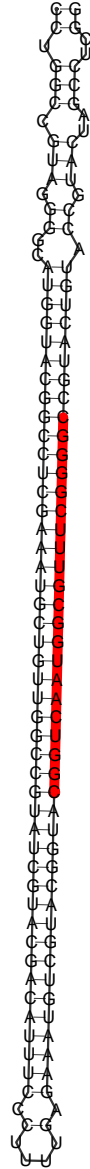



NAME: pab-miR114231  
SEQ:TCGACGACATTTTCCTGGCTGT  
LENGTH: 21

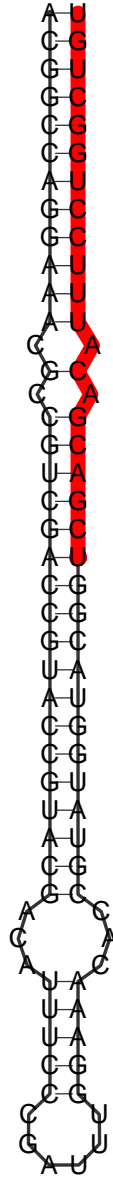

NAME: pab-miR11424  
SEQ:ACTGTGATTAAATCTGGGACT  
LENGTH: 21

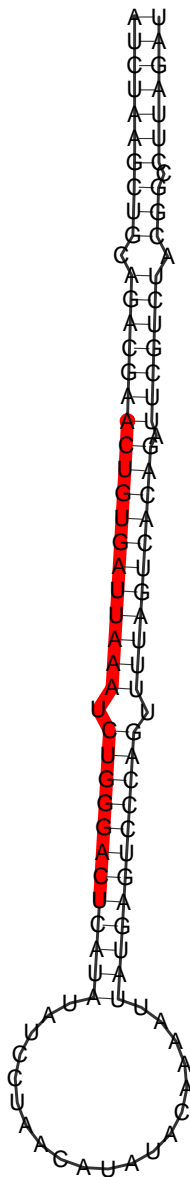

NAME: pab-miR11425a-3p  
SEQ: TTCACAGCTATATCTTTTCCT  
LENGTH: 22

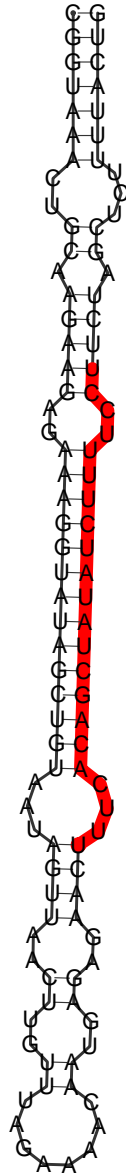

NAME: pab-miR11425a-5p  
SEQ:AGAAAGGTATAGCTGTAATAGT  
LENGTH: 22

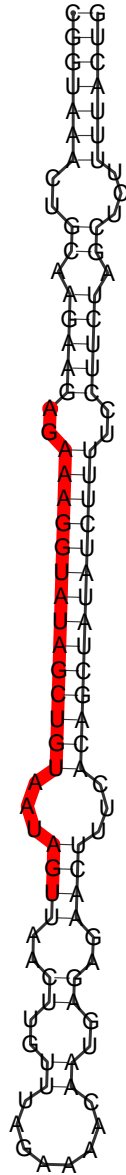

NAME: pab-miR11425b  
SEQ:AGAGAAAGTTATAGCTGTAATA  
LENGTH: 22

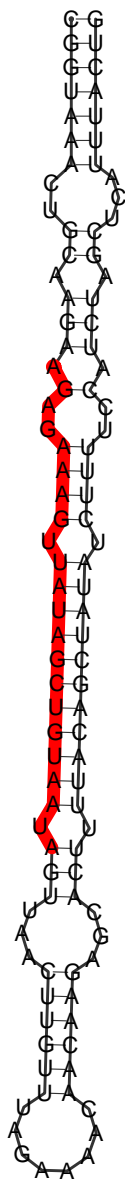

NAME: pab-miR11425c  
SEQ:AGAGAAAGTTATAGCTGTAATA  
LENGTH: 22

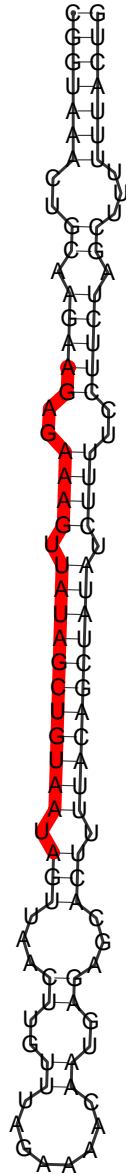

NAME: pab-miR11425d  
SEQ:AGAGAAAGTTATAGCTGTAATA  
LENGTH: 22

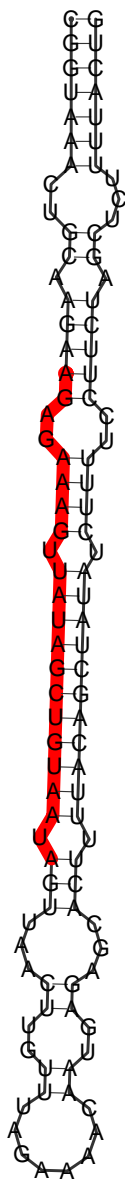

NAME: pab-miR11425e  
SEQ:TTTACTGCTATATCTTTTCCT  
LENGTH: 21

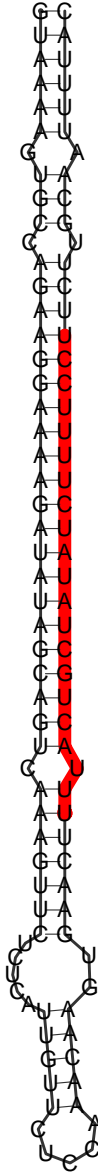



NAME: pab-miR11425f

SEQ:TTTACTGCTATATCTTTTCCT

LENGTH: 21

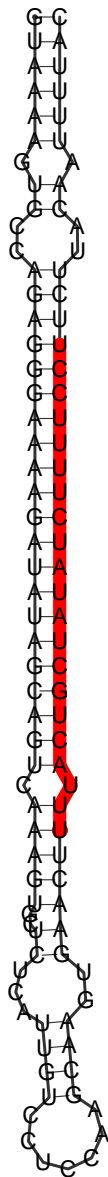

NAME: pab-miR11426a

SEQ:AGAACTGGAGTTTGTGACTC

LENGTH: 21

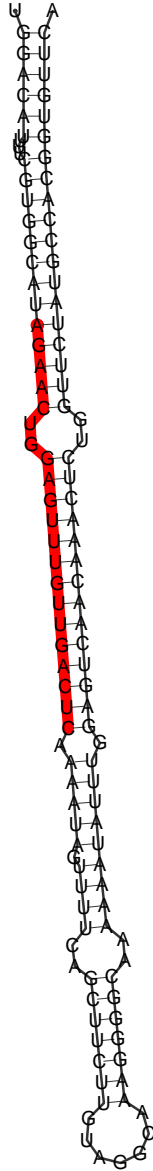

NAME: pab-miR11426b  
SEQ:AGAATCAACAAACTCTGGCTCT  
LENGTH: 22

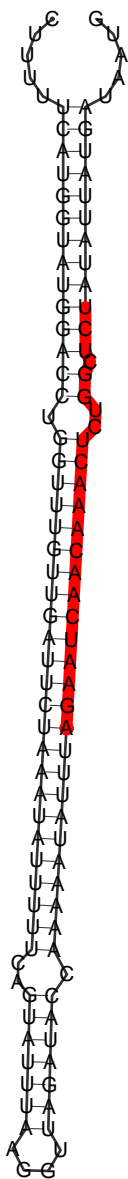

NAME: pab-miR11427a  
SEQ:AGACCGAAGGCGAGAATGGAGC  
LENGTH: 22

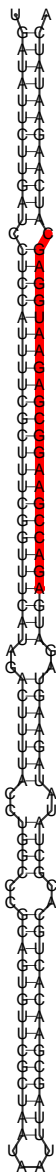

NAME: pab-miR11427b  
SEQ:AGACCGAAGGCGAGAATGGAGC  
LENGTH: 22

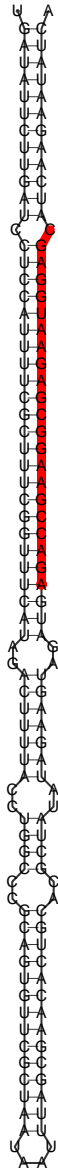

NAME: pab-miR11428  
SEQ:AGATTGAGAACCCTGAGAGAG  
LENGTH: 21

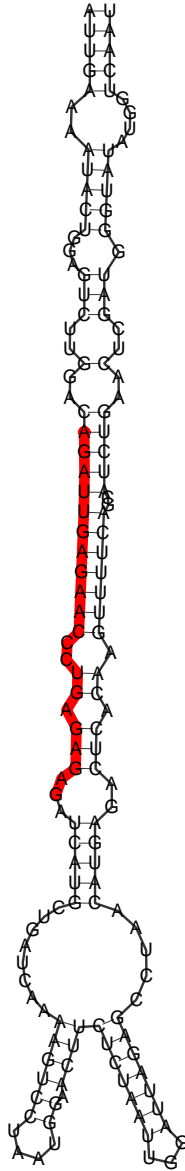

NAME: pab-miR11429a  
SEQ:AGCAGCATGACACCAAGGGC  
LENGTH: 20

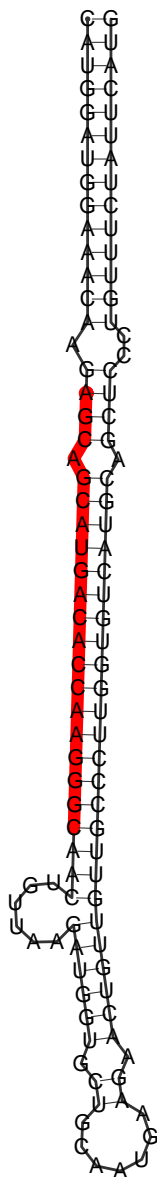

NAME: pab-miR11429b  
SEQ:AGCAGCATGACACCAAGGGC  
LENGTH: 20

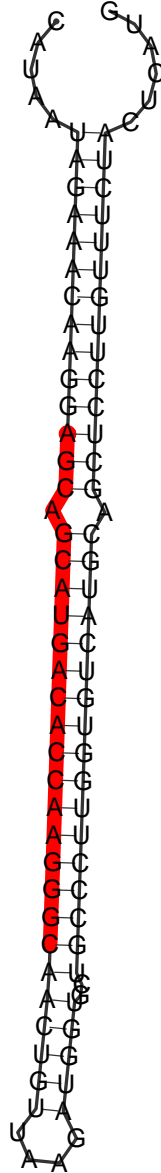



NAME: pab-miR11429c  
SEQ:AGCAGCATGACACCAAGGGC  
LENGTH: 20

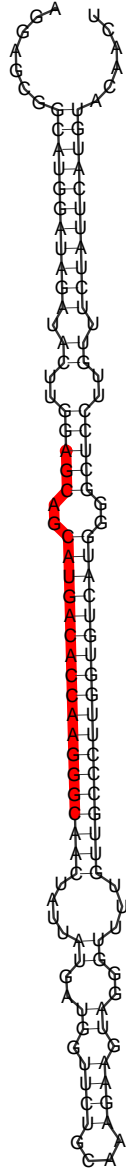

NAME: pab-miR11429d  
SEQ:AGCAGCATGACACCAAGGGC  
LENGTH: 20

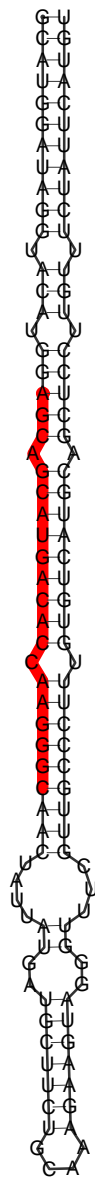

NAME: pab-miR11430  
SEQ:AGCGGTTTCGAGTTGAAGGCT  
LENGTH: 21

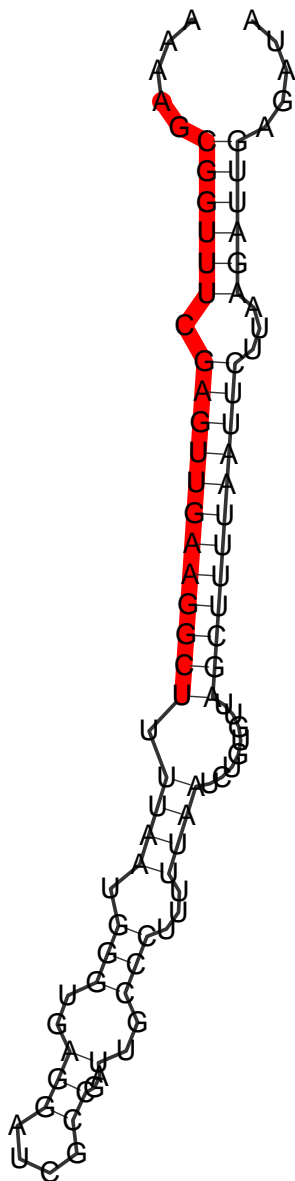

NAME: pab-miR11431a  
SEQ:AGGATCAACACTTGAGCATA  
LENGTH: 20

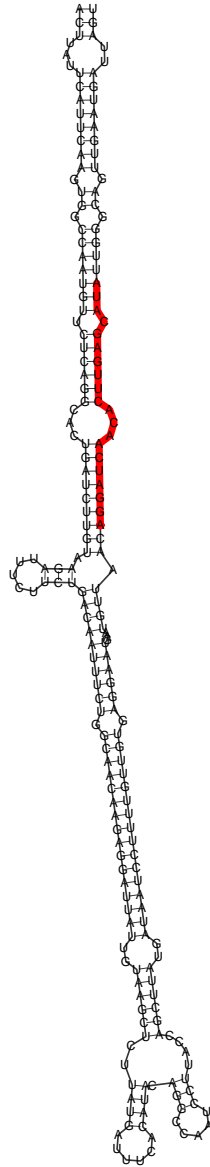

NAME: pab-miR11431b  
SEQ: TAACTAATGCATTCAACTGTCC  
LENGTH: 22

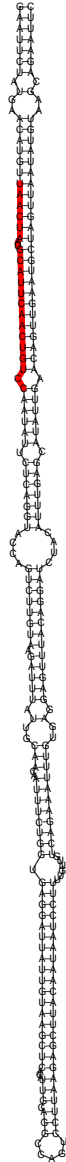

NAME: pab-miR11431c  
SEQ: TAACTAATGCATTCAACTGTCC  
LENGTH: 22

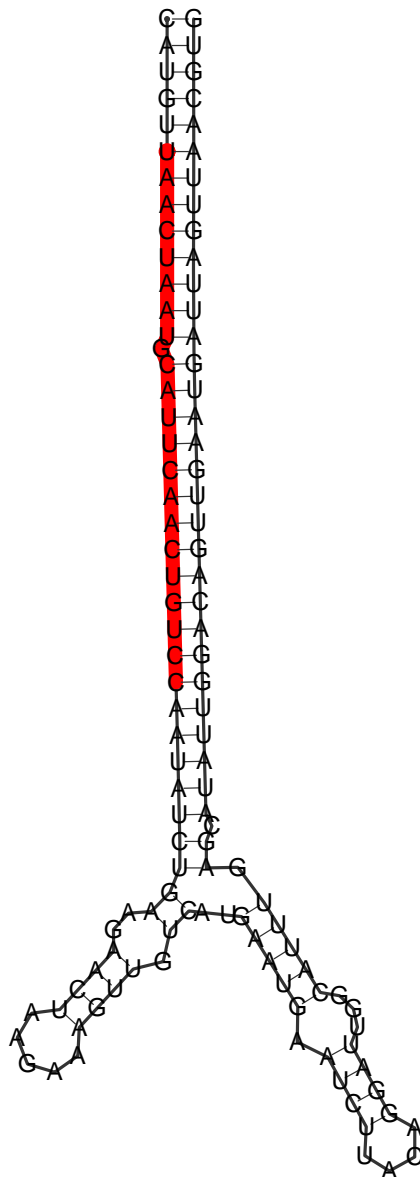

NAME: pab-miR11432  
SEQ:AGGTGGAACACCAACCAGTGT  
LENGTH: 21

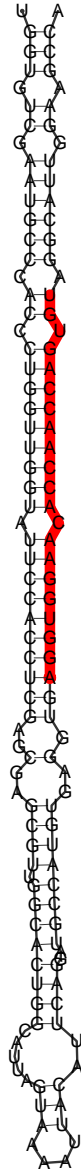

NAME: pab-miR11433  
SEQ:AGTCGAGCATCTCCAATGGGC  
LENGTH: 21

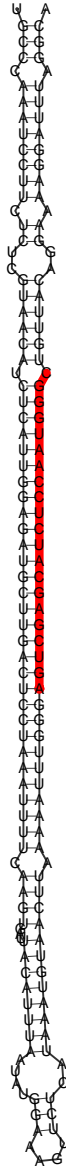





NAME: pab-miR11435  
SEQ: ATCAATTGCTCGTCTTGGGGT  
LENGTH: 21

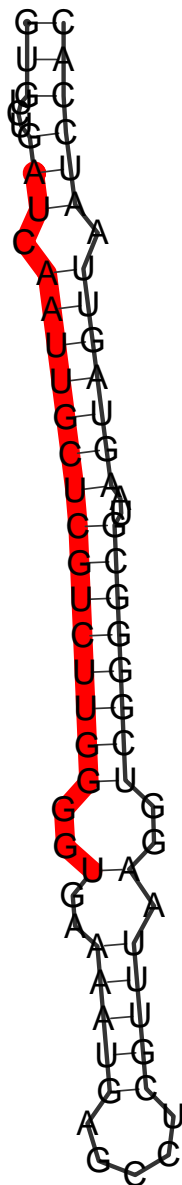

NAME: pab-miR11436a  
SEQ:ATCCTTTTGAAAGCTTGGCCA  
LENGTH: 21

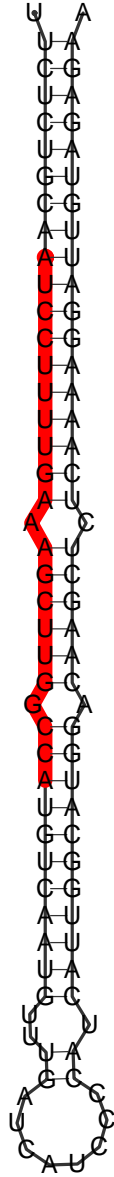

NAME: pab-miR11436b  
SEQ:ATCCTTTTGAAAGCTTGGCCA  
LENGTH: 21

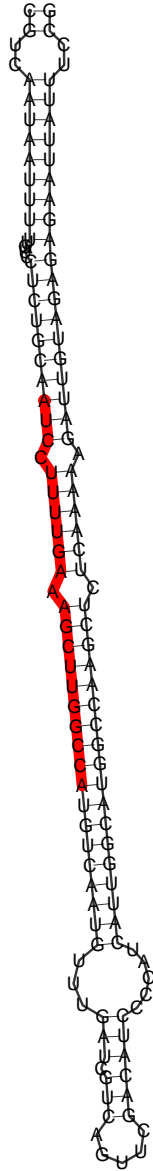

NAME: pab-miR11436c  
SEQ:ATCCTTTTGAAAGCTTGGCCA  
LENGTH: 21

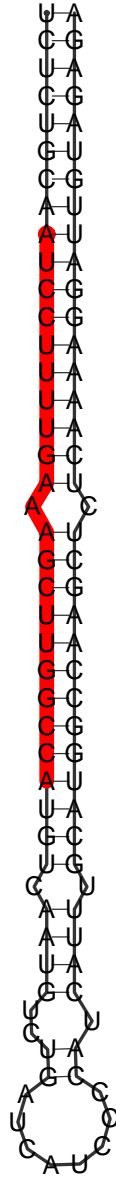

NAME: pab-miR11436d  
SEQ:ATCCTTTTGAAAGCTTGGCCA  
LENGTH: 21

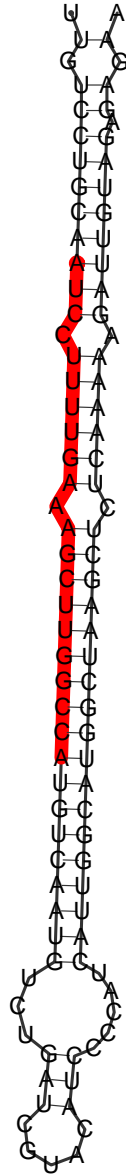

NAME: pab-miR11437  
SEQ:ATCTAATATCAATGTCGGCCT  
LENGTH: 21

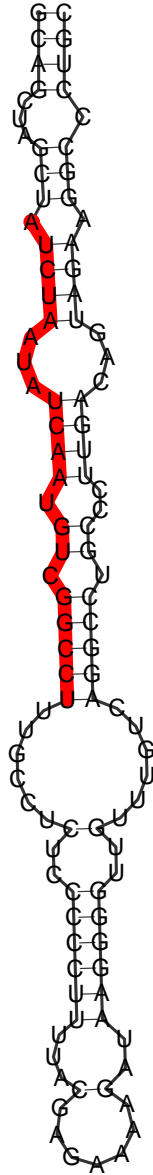

NAME: pab-miR11438  
SEQ:ATGGATTATGCATTCGAAGTG  
LENGTH: 21

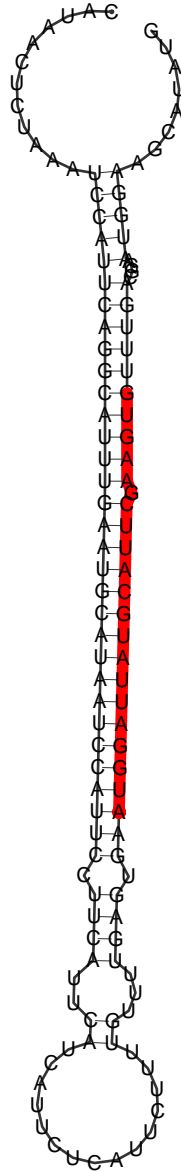



NAME: pab-miR11439  
SEQ:ATGGTCAGTCCTCCCTCGCCT  
LENGTH: 21

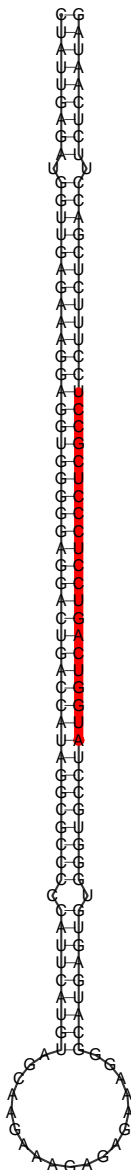

NAME: pab-miR11440a  
SEQ:ATGTCGTGGATGTAGGGGAGA  
LENGTH: 21

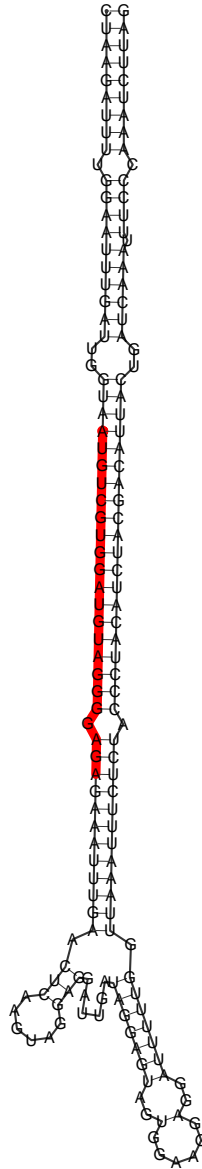

NAME: pab-miR11440b  
SEQ:ATGTCGTGGATGTAGGGGAGA  
LENGTH: 21

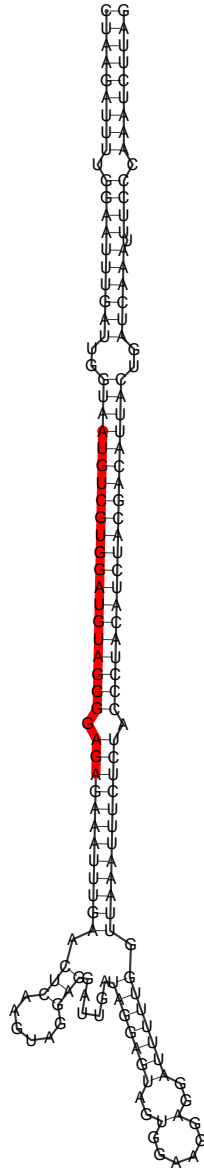

NAME: pab-miR11441a  
SEQ:ATTGCCGCGTCGTCTTTGGCG  
LENGTH: 21

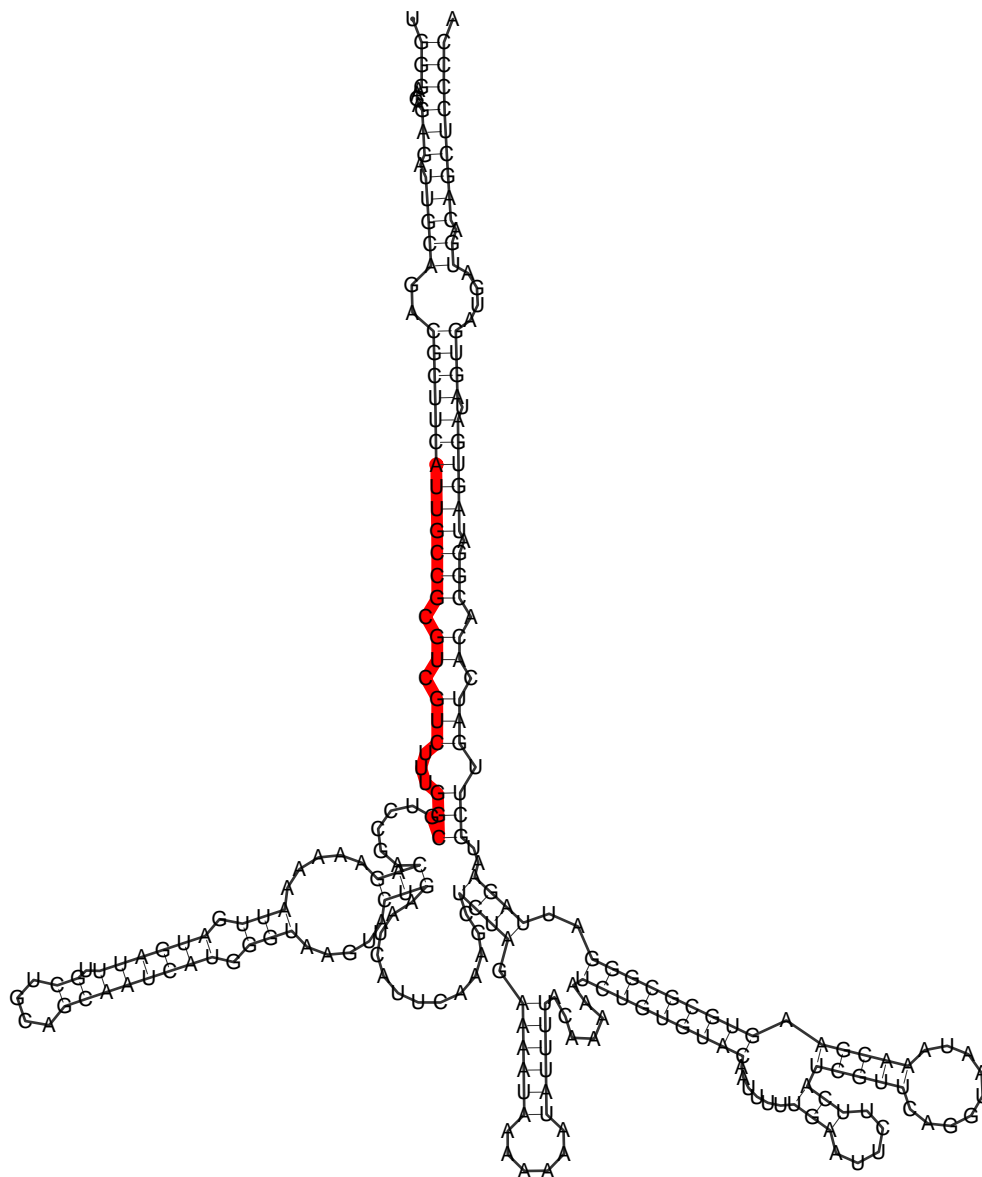

NAME: pab-miR11441b  
SEQ:ATTGCCGCGTCGTCTTTGGCG  
LENGTH: 21

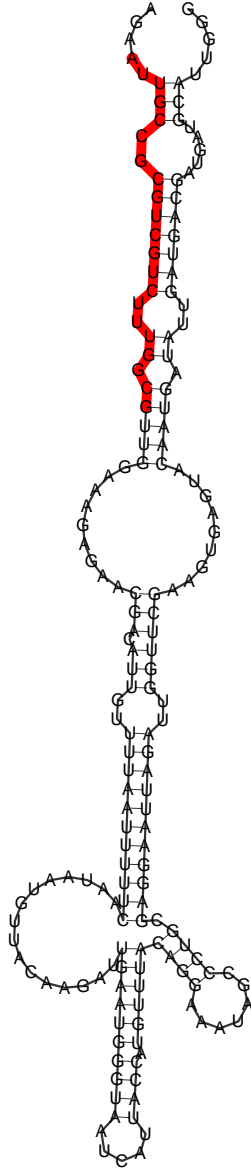

NAME: pab-miR11442  
SEQ:ATTGGGATTCGTCATCAGGAC  
LENGTH: 21

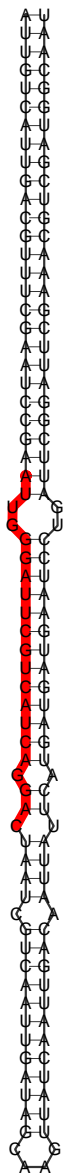

NAME: pab-miR11443

SEQ:ATTTGAGAGTTGGAATGGGCAG

LENGTH: 22

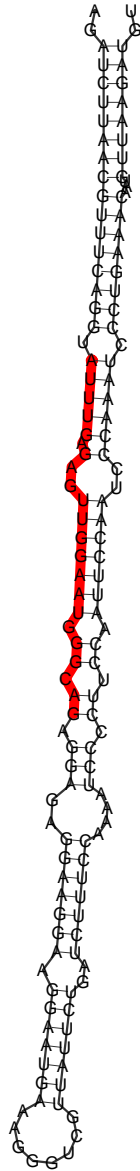

NAME: pab-miR11444  
SEQ:ATTTGGTTAAGCAGGATTACT  
LENGTH: 21

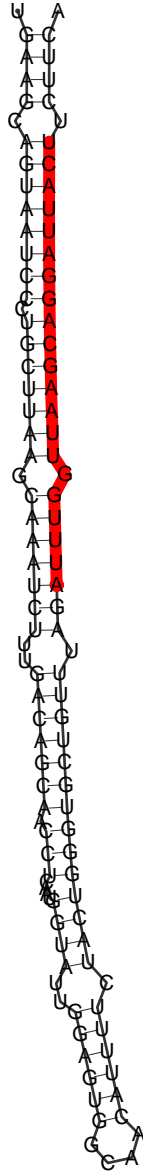



NAME: pab-miR11445a  
SEQ:ATTTTAATTTCACACTTGGGC  
LENGTH: 21

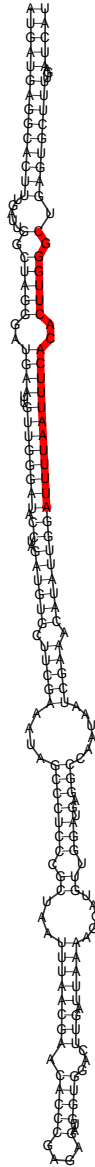

NAME: pab-miR11445b  
SEQ:ATTTTAATTTCACACTTGGGC  
LENGTH: 21

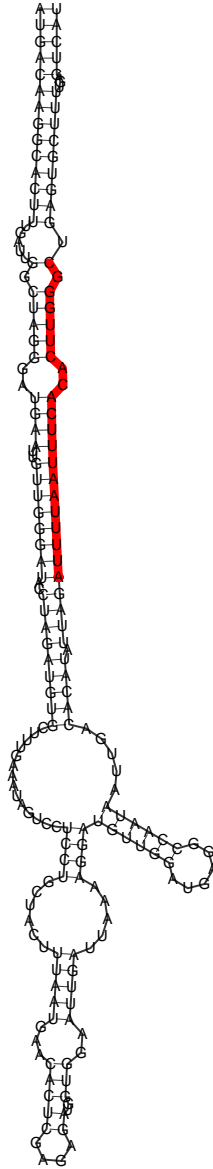

NAME: pab-miR11445c  
SEQ:ATTTTAATTTCACACTTGGGC  
LENGTH: 21

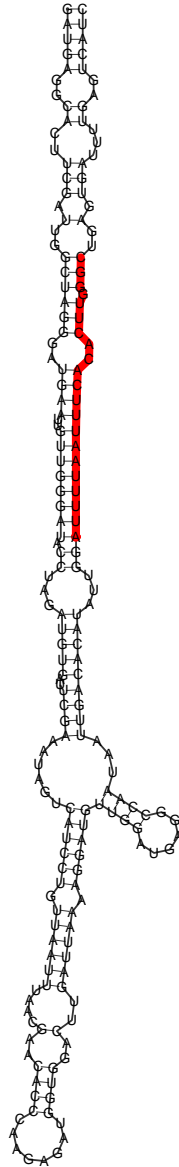

NAME: pab-miR11446  
SEQ:ATTTTGCACCATTCACGTCT  
LENGTH: 21

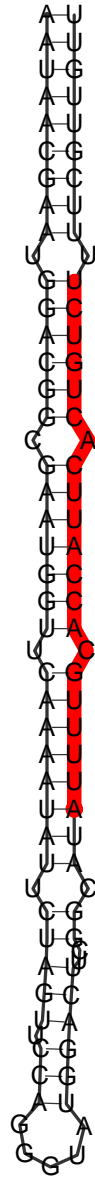

NAME: pab-miR11447  
SEQ:ATTTTCCAGAAAAC TTCCT  
LENGTH: 21

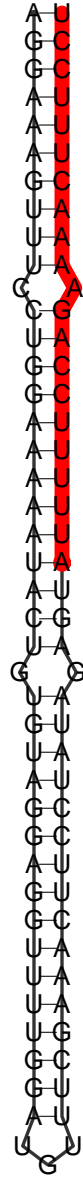

NAME: pab-miR11448

SEQ: CAACGGCGCACCTTCAAGTGCT

LENGTH: 22

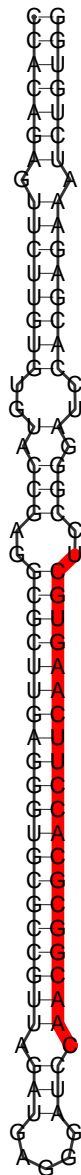

NAME: pab-miR11449  
SEQ: CAAGGCTGTTGAGTTGAGATC  
LENGTH: 21

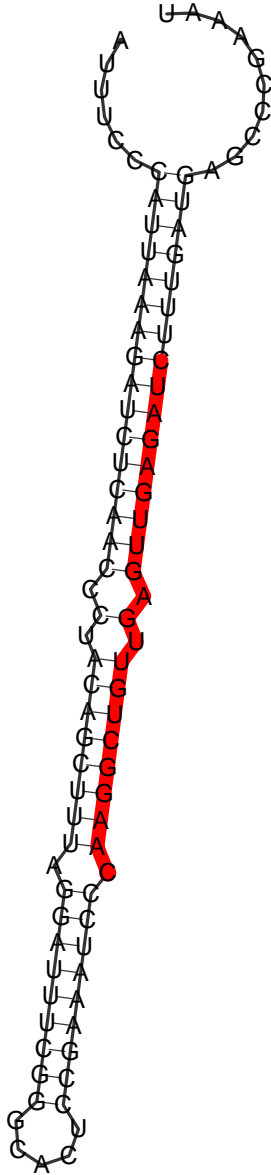

NAME: pab-miR11450  
SEQ: CAAGTGGAAGCTAGTTAGCGCT  
LENGTH: 21

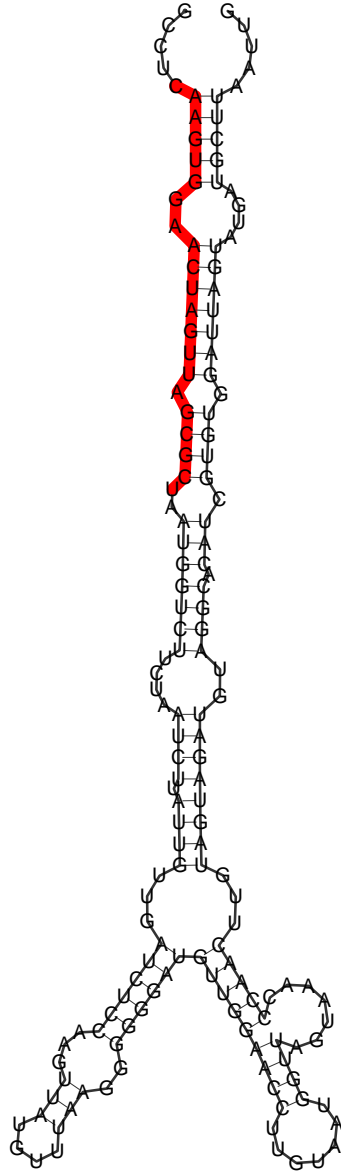



NAME: pab-miR11451  
SEQ: CAATTACTATGTGGATTGCT  
LENGTH: 20

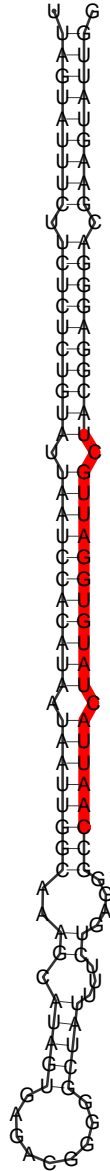

NAME: pab-miR11452-3p  
SEQ: CACCTGATCGATCTTCCCACC  
LENGTH: 21

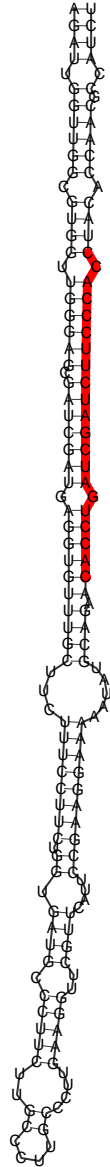

NAME: pab-miR11452-5p  
SEQ:TGGGAGCGATCGATGAGGTGTT  
LENGTH: 22

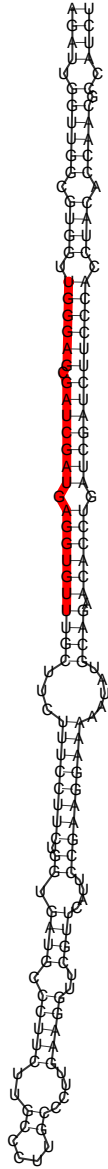

NAME: pab-miR11453  
SEQ: CAGACTCGGCCTTGGAATCGGT  
LENGTH: 22

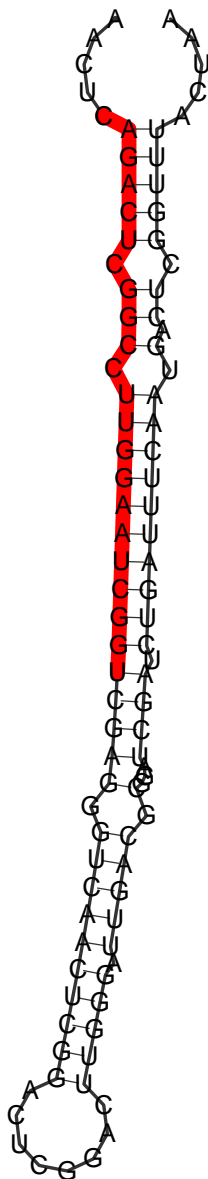

NAME: pab-miR11454a  
SEQ: CAGAGCTTTCACGAATTGGGC  
LENGTH: 21

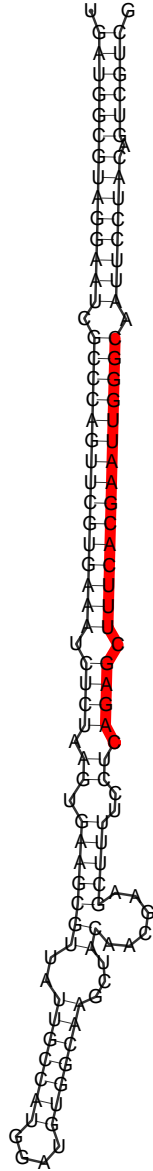

NAME: pab-miR11454b

SEQ: CAGAGCTTTCACGAATTGGGC

LENGTH: 21

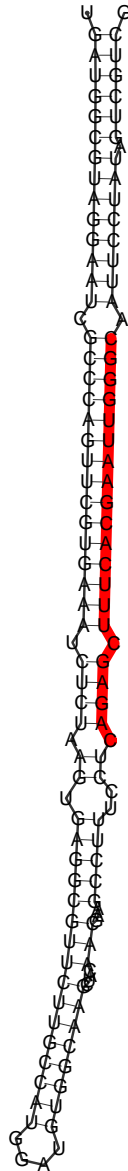

NAME: pab-miR11455  
SEQ: CATCAATCAATGATCTTGGTC  
LENGTH: 21

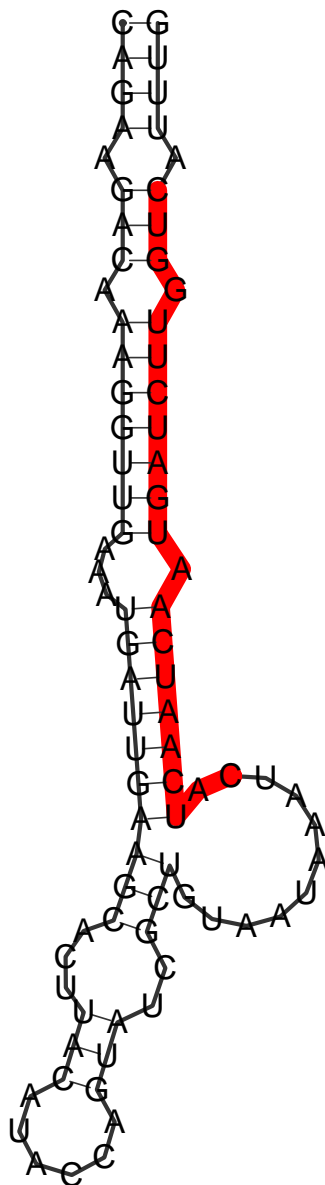

NAME: pab-miR11456  
SEQ: CATGTCCTTCGATTAAAGCCT  
LENGTH: 21

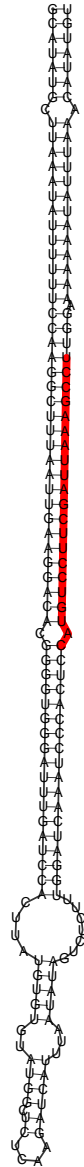



NAME: pab-miR11457-3p  
SEQ:TGGCTCTTGAACATTATAAT  
LENGTH: 20

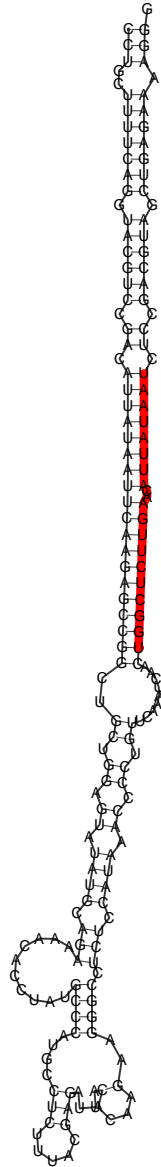

NAME: pab-miR11457-5p  
SEQ: CATTATAATTCAAGAGCCGGC  
LENGTH: 21

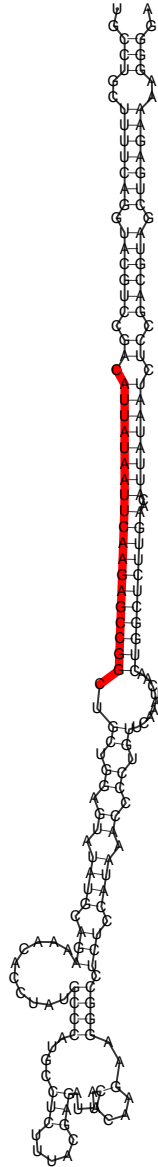

NAME: pab-miR11458  
SEQ: CCAGACAGTATGAAAAGCAGT  
LENGTH: 21

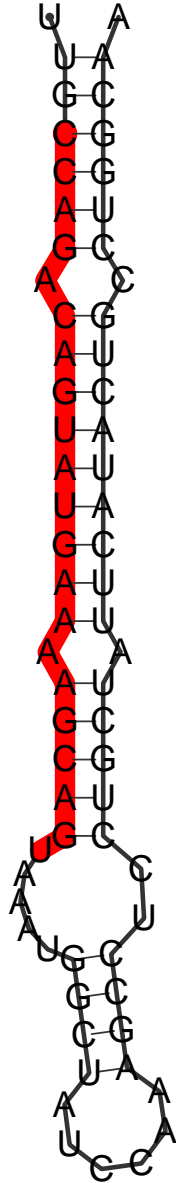

NAME: pab-miR11459  
SEQ:CCCGGGGGGAACGCATATCTG  
LENGTH: 21

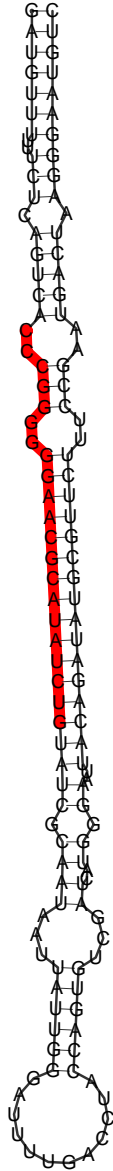

NAME: pab-miR11460  
SEQ:CGAGCGCTTCAAAGAGAAGAAG  
LENGTH: 22

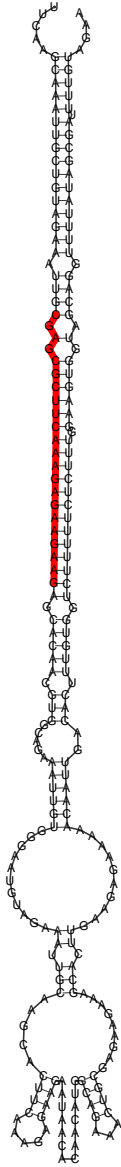

NAME: pab-miR11461  
SEQ:CGAGGAGGAGAGCTAAGAGCC  
LENGTH: 21

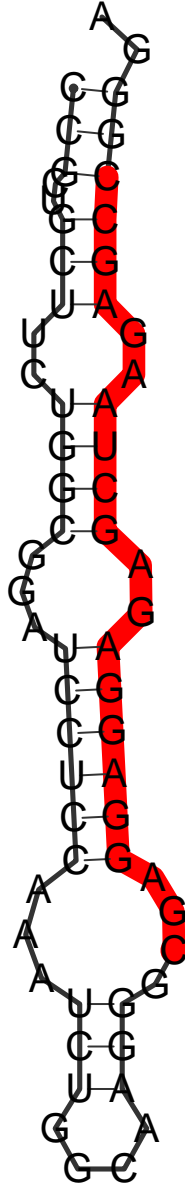

NAME: pab-miR11462-3p  
SEQ:CGCGGTACTCTCTCTCAGAAG  
LENGTH: 22

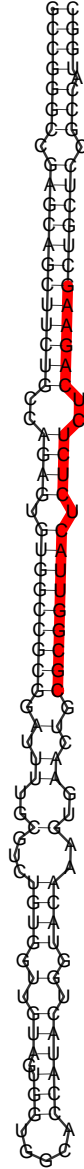

NAME: pab-miR11462-5p  
SEQ:TCTGCCAGAGTGTGGCCGCGGA  
LENGTH: 22

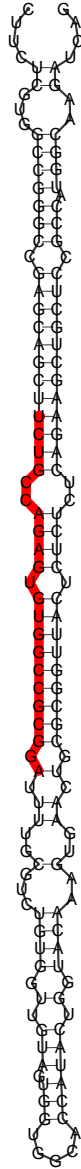



NAME: pab-miR11463  
SEQ:CTAATAGCGAGCATCTGGGCC  
LENGTH: 21

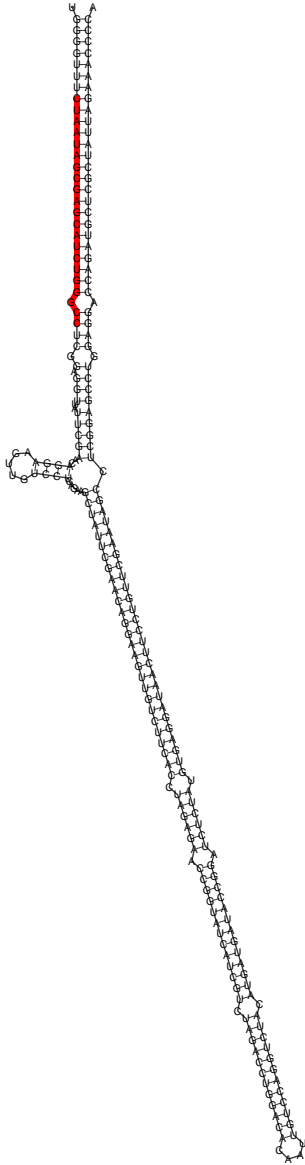

NAME: pab-miR11464a  
SEQ:CTAGGACACATGTTTGAAACG  
LENGTH: 21

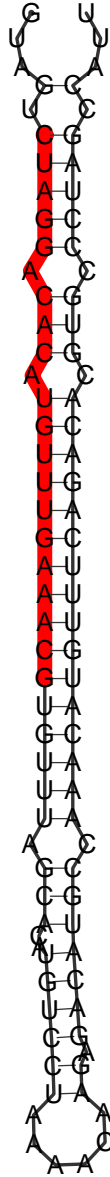

NAME: pab-miR11464b  
SEQ:TGAAGACACGTGTTGGACACG  
LENGTH: 21

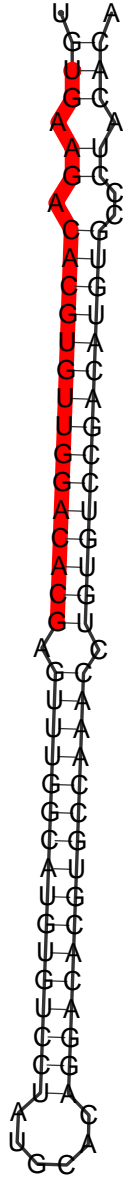

NAME: pab-miR11465  
SEQ:CTATGGGTTAAGGATGAGACT  
LENGTH: 21

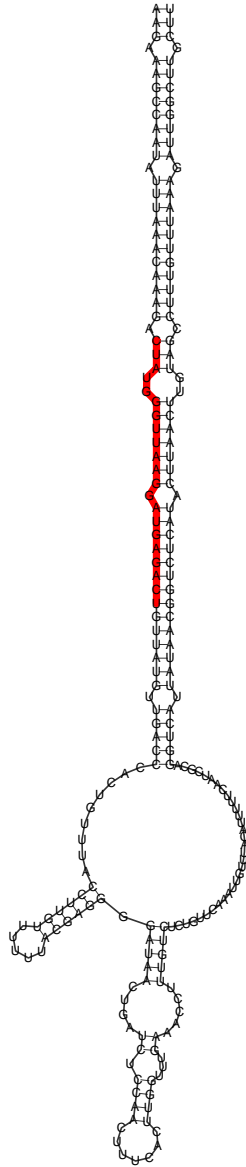

NAME: pab-miR11466a  
SEQ:CTCCACAAGAGATTTGTTCTC  
LENGTH: 21

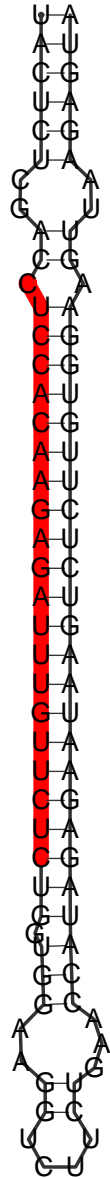

NAME: pab-miR11466b  
SEQ:TCCACCTCCACAAGACACTTG  
LENGTH: 21

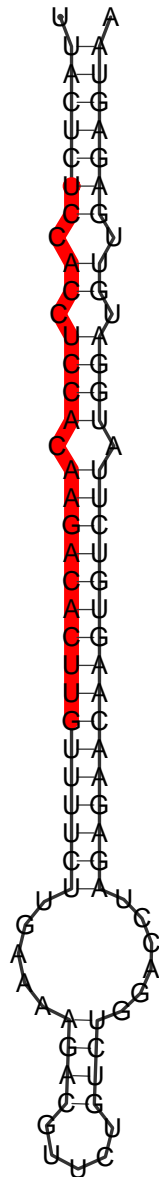

NAME: pab-miR11466c  
SEQ:TCTACAAGGCATTTGTTCTCT  
LENGTH: 21

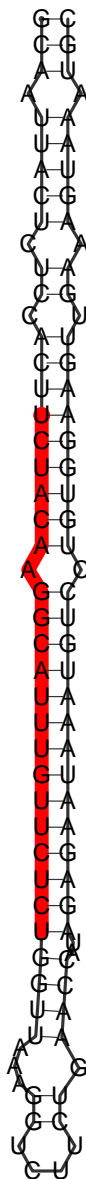

NAME: pab-miR11466d  
SEQ:TCTACCTCTACAAGACACTTG  
LENGTH: 21

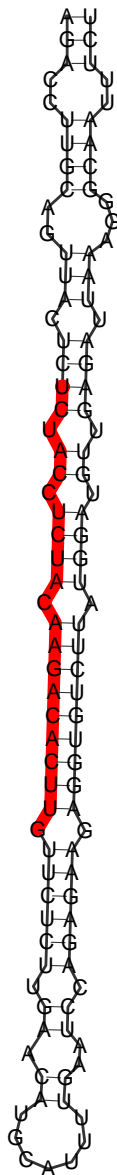



NAME: pab-miR11466e  
SEQ: TTCCACCAGACACTTGGTTCTC  
LENGTH: 21

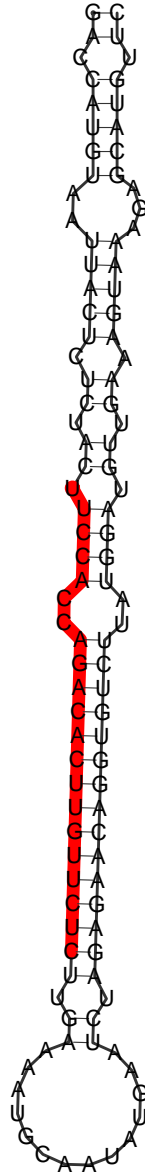

NAME: pab-miR11467a  
SEQ: CTGAAAAGCTTATCGAAGGGA  
LENGTH: 21

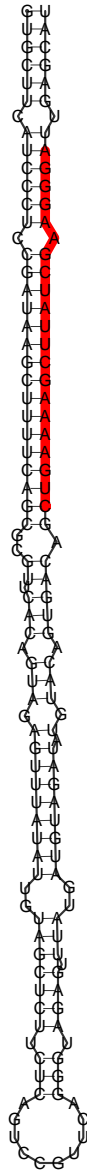

NAME: pab-miR11467b  
SEQ: CTGAAAAGCTTATCGAAGGGA  
LENGTH: 21

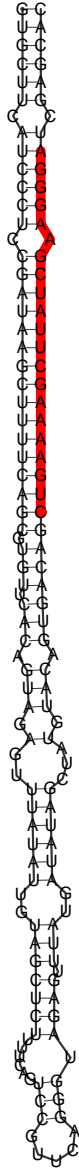

NAME: pab-miR11468  
SEQ:CTGGATTTTCATTAGAACAGC  
LENGTH: 21

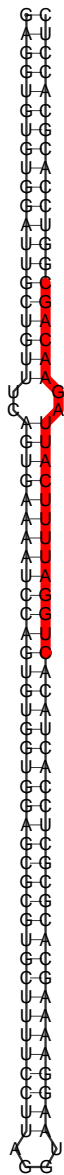



NAME: pab-miR11470  
SEQ: CTTGGGATTGAAGATTGATCT  
LENGTH: 21

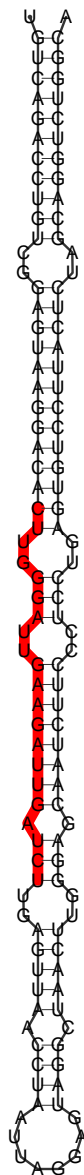

NAME: pab-miR11471  
SEQ:CTTTGGGATGTCAGTGTCT  
LENGTH: 21

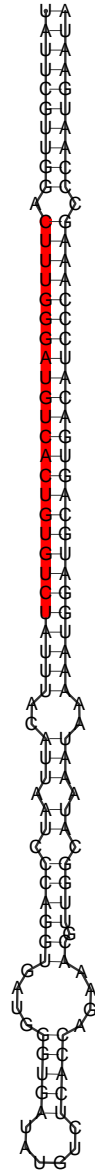

NAME: pab-miR11472  
SEQ:CTTTTCTCTCGATTCTTGGTG  
LENGTH: 21

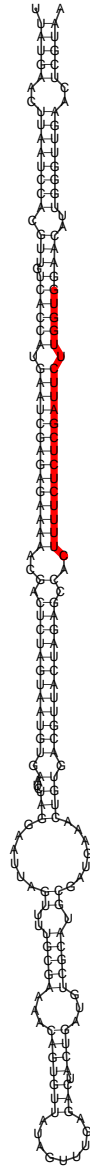



NAME: pab-miR11473-3p  
SEQ:GAAGGAACCAGATGACGAACG  
LENGTH: 21

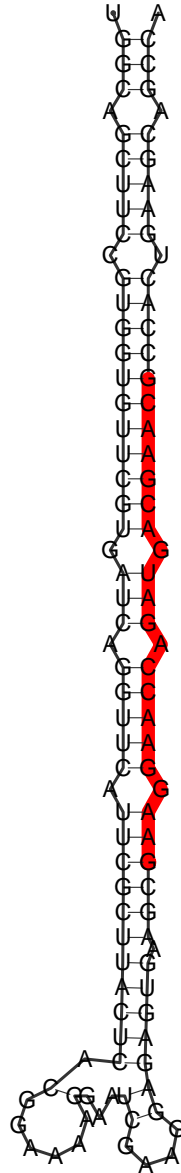

NAME: pab-miR11473-5p  
SEQ: TTCGTGATCAGGTTTCATTCGC  
LENGTH: 21

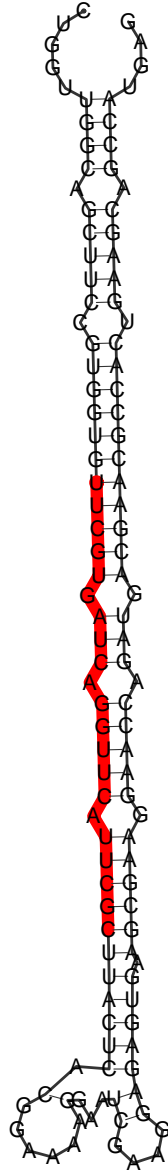

NAME: pab-miR11474  
SEQ:GAGAATCGCTGGAGATACCTG  
LENGTH: 21

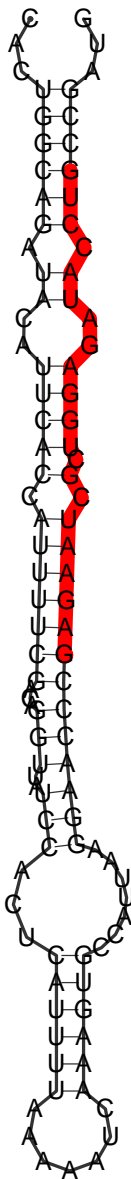

NAME: pab-miR11475  
SEQ:GATGTGCAATAGGTAAGAAAGG  
LENGTH: 22

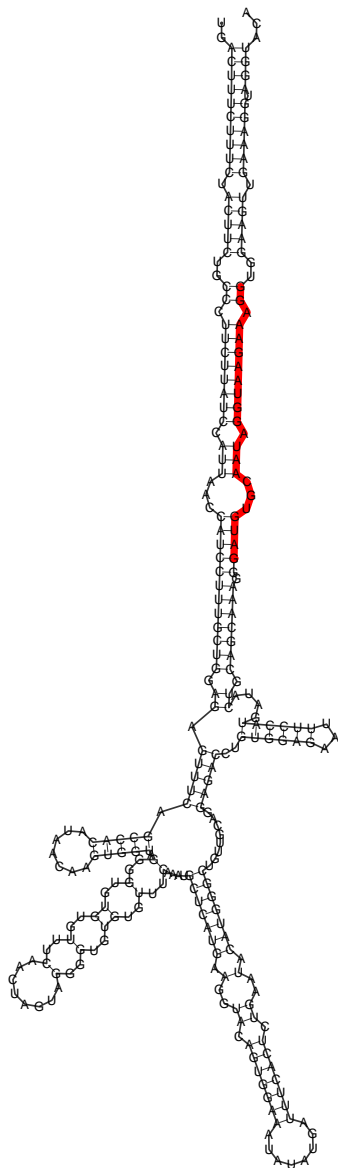

NAME: pab-miR11476a  
SEQ:GATTGCAGTAGGTTGTTTAGC  
LENGTH: 22

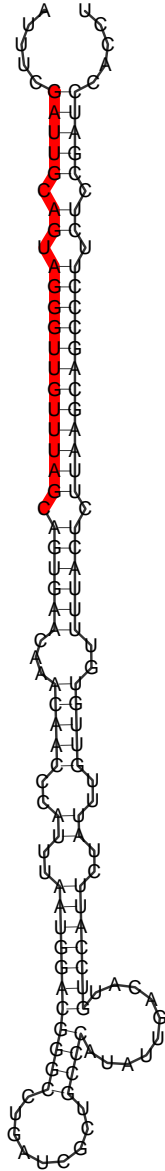

NAME: pab-miR11476b-3p  
SEQ:TAAGCAGCCCTTCTCCGATCCA  
LENGTH: 22

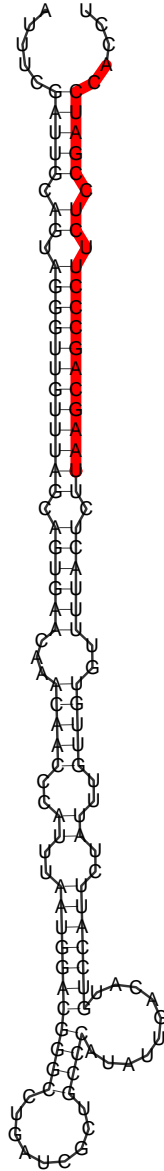

NAME: pab-miR11476b-5p  
SEQ:GATTGCAGTAGGTTGTTTAGC  
LENGTH: 22

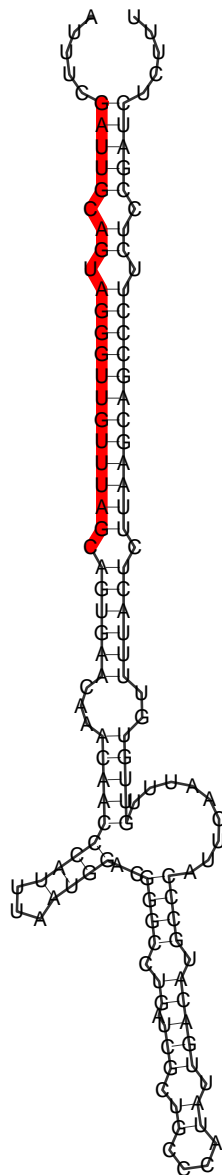

NAME: pab-miR11477  
SEQ:GCCGTAGCTTGACACAGAGC  
LENGTH: 20

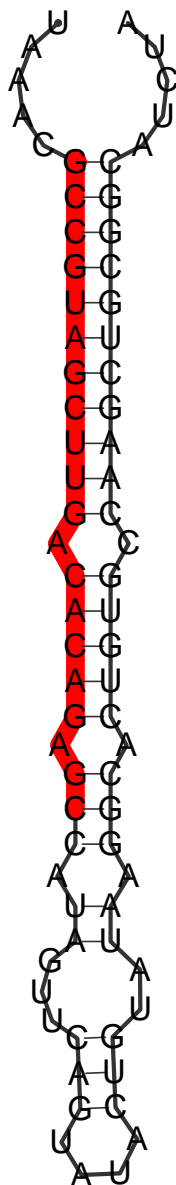



NAME: pab-miR11478  
SEQ:GGAAGCCCATGTCTGTAGATT  
LENGTH: 21

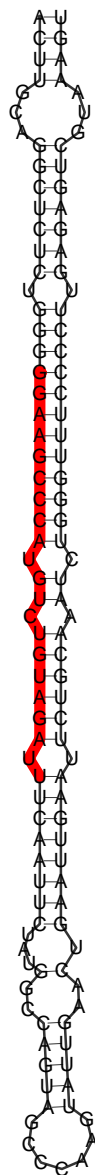

NAME: pab-miR11479  
SEQ:GGACATGATGCTGATGATGAT  
LENGTH: 21

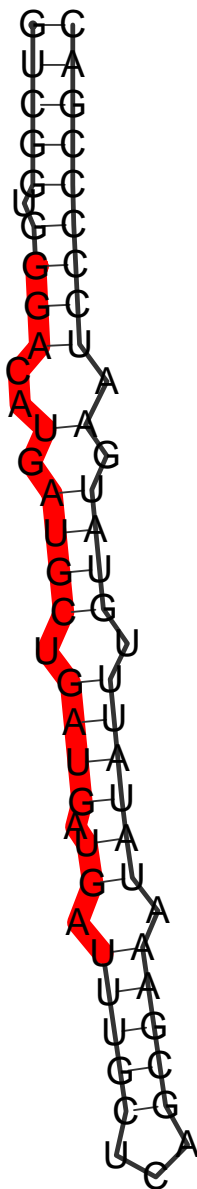

NAME: pab-miR11480  
SEQ:GGAGGCCAGTTGGACAAGGCT  
LENGTH: 21

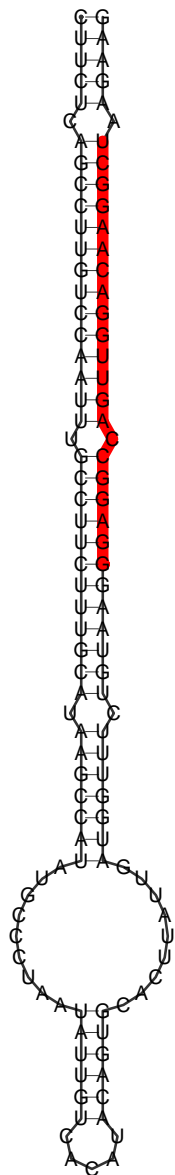

NAME: pab-miR11481a  
SEQ:GTGCATCGAGACGGTCGGAAGC  
LENGTH: 22

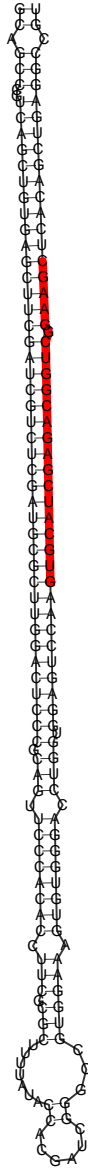

NAME: pab-miR11481b  
SEQ:TCCGGTGAAGAGTAGCCCGTC  
LENGTH: 21

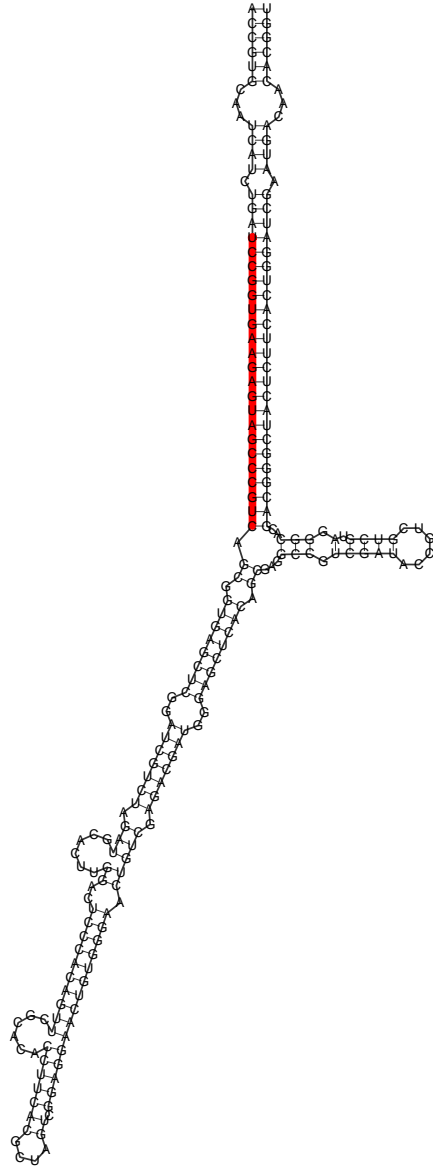



NAME: pab-miR11482  
SEQ:TAACCAGTCCTTCTGCAATCCA  
LENGTH: 22

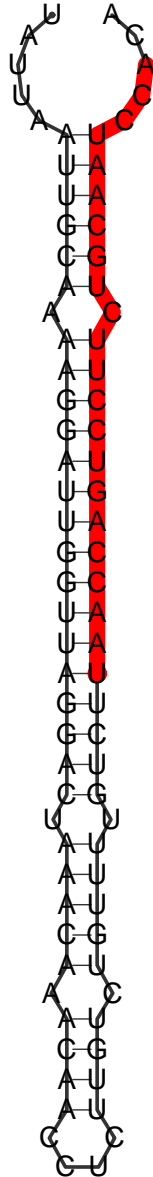

NAME: pab-miR11483  
SEQ:TAACCTGATCGACTTGCCATA  
LENGTH: 21

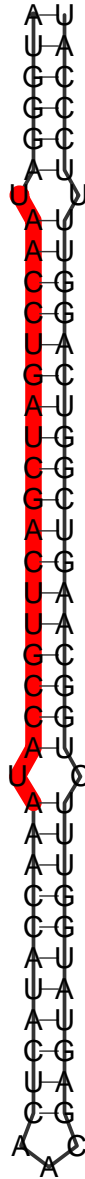



NAME: pab-miR11484

SEQ:TAATTCCACATCCAATGACTG

LENGTH: 21

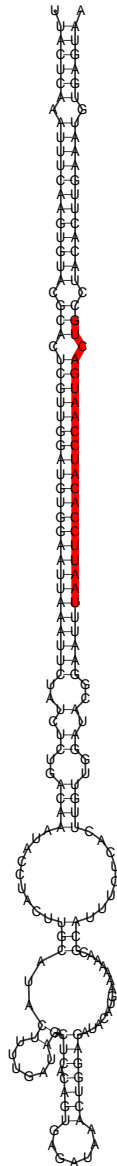

NAME: pab-miR11485  
SEQ: TAGAATGCAAAAAGTCTGCTA  
LENGTH: 21

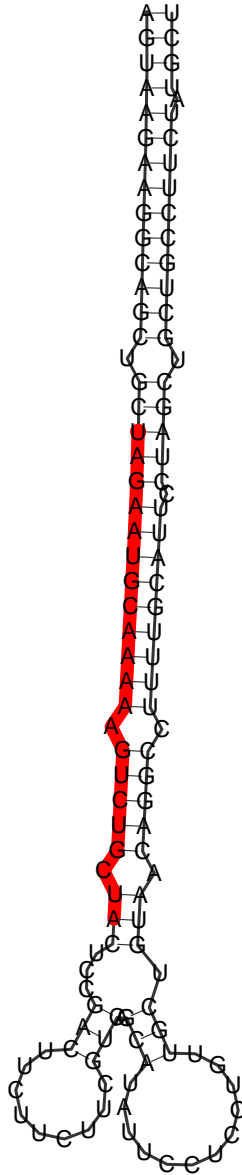

NAME: pab-miR11486  
SEQ:TAGAGAATCTGCATGGTGGAC  
LENGTH: 21

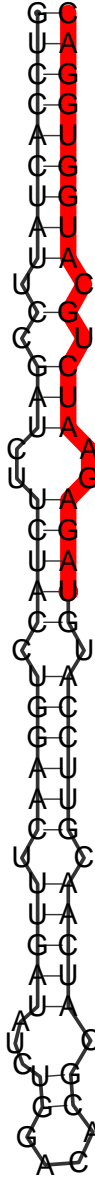

NAME: pab-miR11487a  
SEQ:TAGAGGCAGACTGAGAAGGCC  
LENGTH: 21

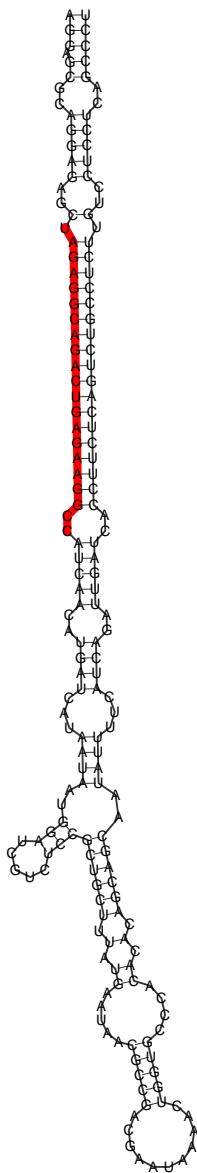

NAME: pab-miR11487b  
SEQ: TGAGAAGGCGATCAACATGAC  
LENGTH: 21

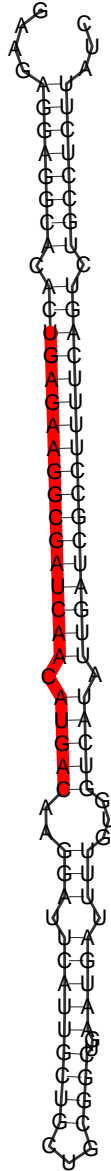

NAME: pab-miR11487c  
SEQ: TGAGAAGGCGATCAACATGAC  
LENGTH: 21

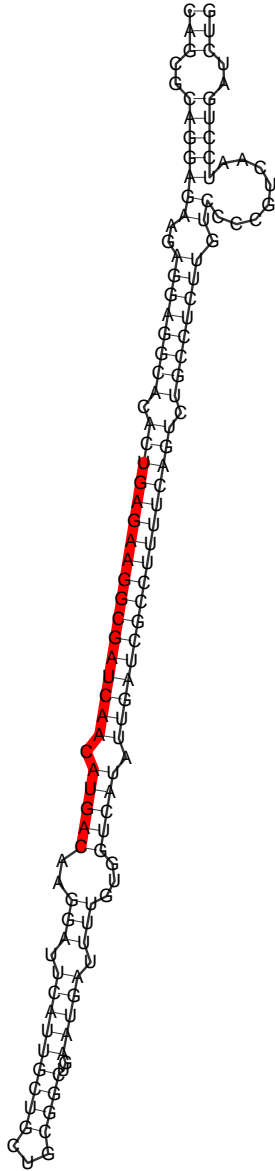

NAME: pab-miR11488  
SEQ: TAGATCCTGAGAATCTTCCGT  
LENGTH: 21

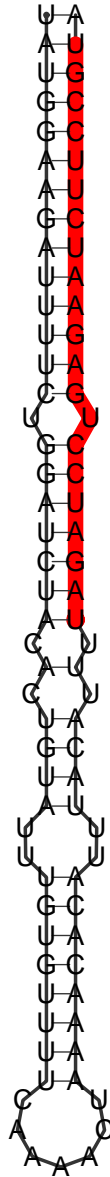

NAME: pab-miR11489  
SEQ:TAGATCTCCAACGAACCGAAT  
LENGTH: 21

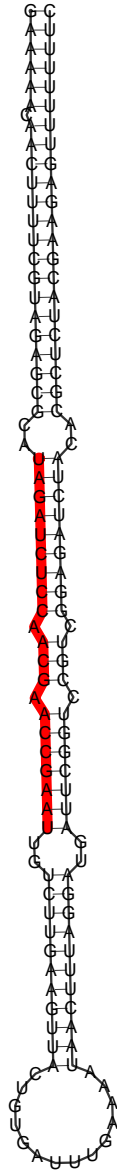



NAME: pab-miR11490a  
SEQ:TAGCCCGAACGCACAATTGGT  
LENGTH: 21

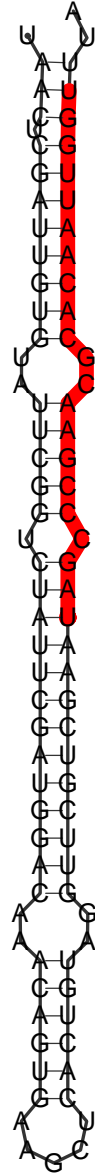

NAME: pab-miR11490b  
SEQ:TAGCCCGAACGCACAATTGGT  
LENGTH: 21

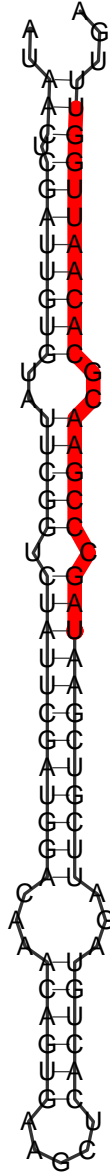

NAME: pab-miR11491  
SEQ:TAGCGGAAGTATTCCAAC TTC  
LENGTH: 21

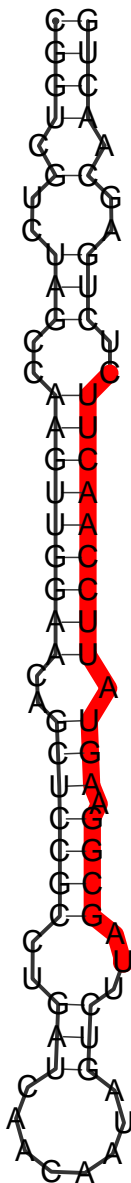

NAME: pab-miR11492  
SEQ:TAGTGGAAATTTGGTTTTTTC  
LENGTH: 21

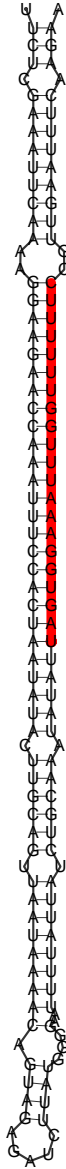

NAME: pab-miR11493a  
SEQ: TAGTGTTGAGAAGATTGAGGA  
LENGTH: 21

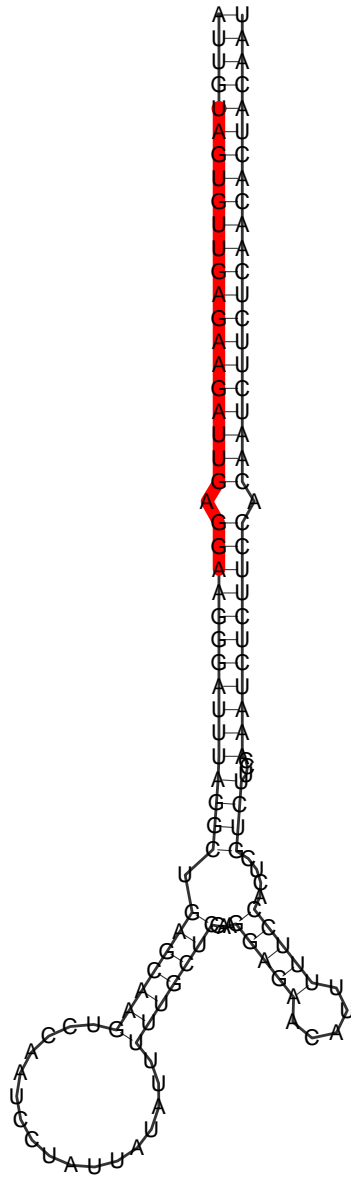

NAME: pab-miR11493b  
SEQ: TAGTGTTGAGAAGATTGAGGA  
LENGTH: 21

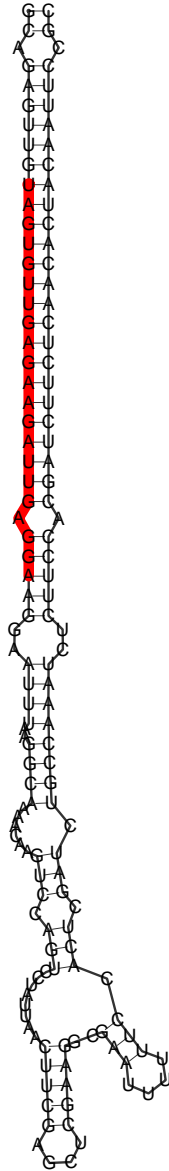

NAME: pab-miR11493c  
SEQ: TAGTGTTGAGAAGATTGAGGA  
LENGTH: 21

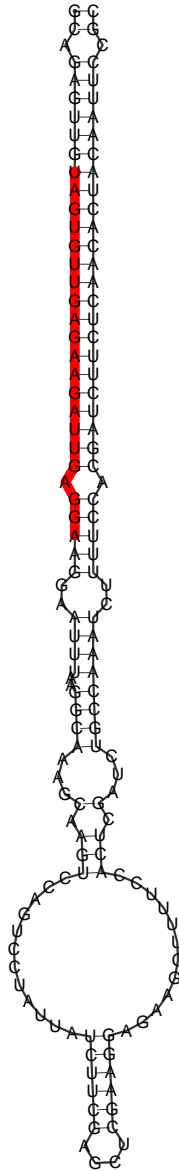

NAME: pab-miR11494  
SEQ: TATAAGAATGCATGATCACCT  
LENGTH: 21

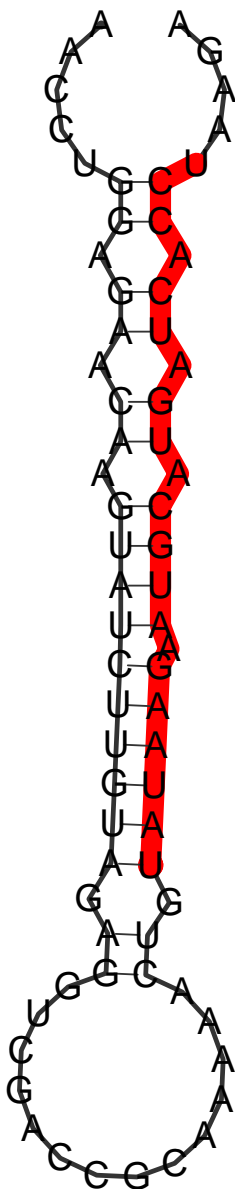



NAME: pab-miR11495  
SEQ:TATAGCAAGTCTGTCTGGTGC  
LENGTH: 21

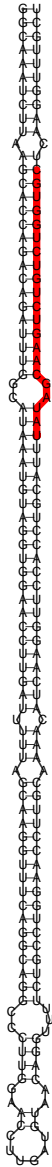

NAME: pab-miR11496  
SEQ:TATAGCGCTCTGGTTCTCATG  
LENGTH: 21

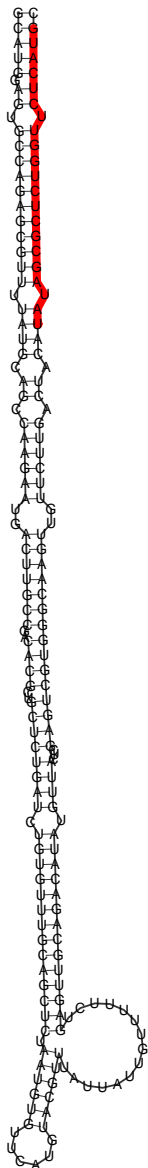

NAME: pab-miR11497-3p  
SEQ:TATCTGCTCAATTTGTTTCATG  
LENGTH: 21

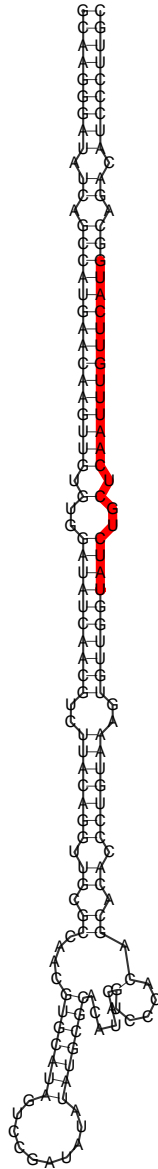

NAME: pab-miR11497-5p  
SEQ:TGAACAAGTTGTGTGGATATC  
LENGTH: 21

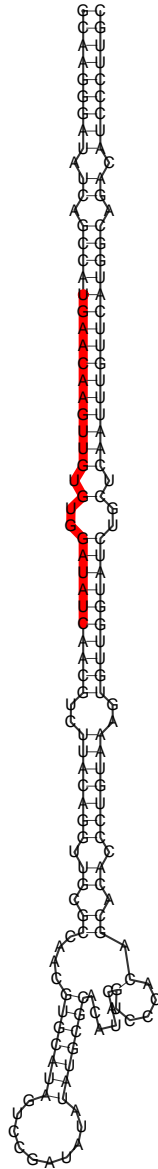

NAME: pab-miR11498a  
SEQ:TATCTGTGATGTAATATGACA  
LENGTH: 21

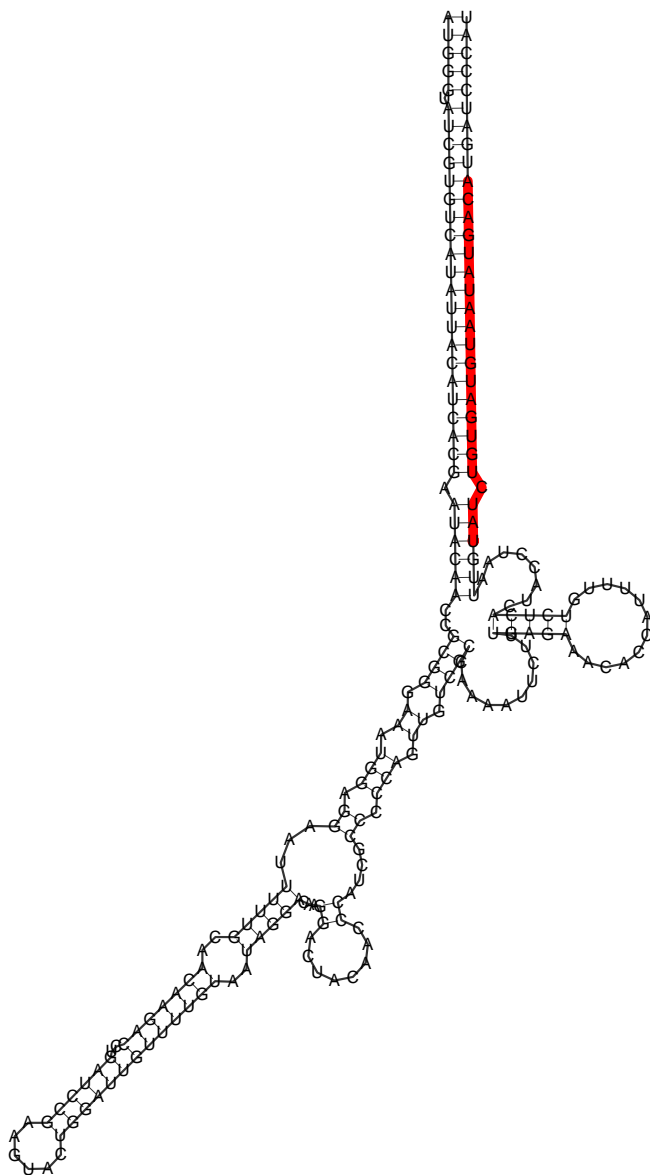

NAME: pab-miR11498b  
SEQ:TCAGTGATGTAGTATGACATG  
LENGTH: 21

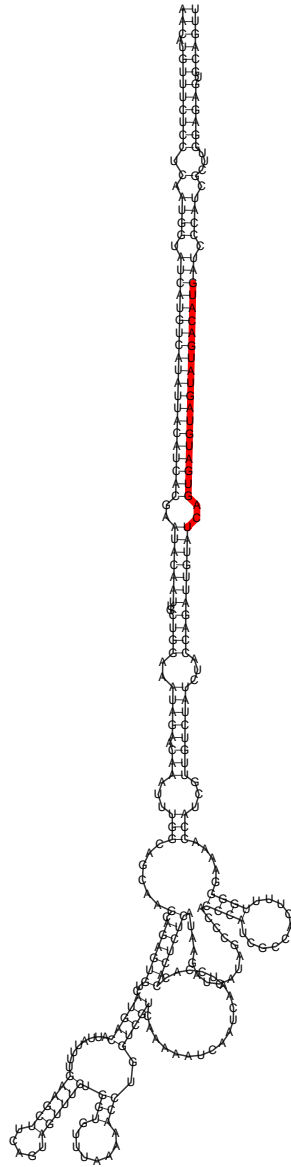

NAME: pab-miR11498c  
SEQ:TCAGTGATGTAGTATGACATG  
LENGTH: 21

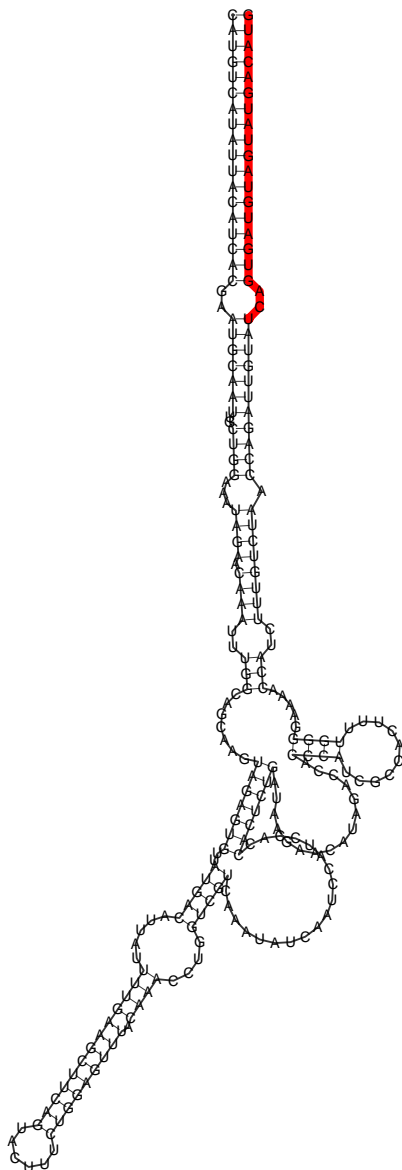

NAME: pab-miR11499a-3p  
SEQ:TATCTTGCTGTGCTTCTCATG  
LENGTH: 21

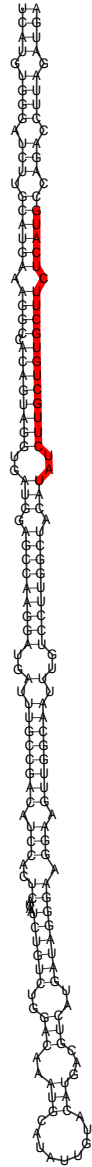



NAME: pab-miR11499a-5p  
SEQ: TGAAAGGCCACAGTAGGTGATG  
LENGTH: 22

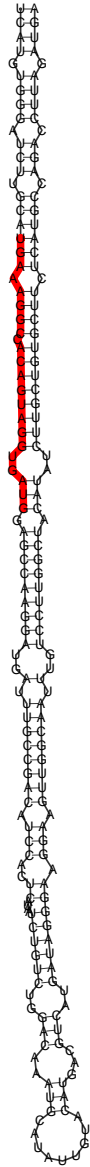

NAME: pab-miR11499b-3p  
SEQ:TATCTTGCTGTGCTTCTCATG  
LENGTH: 21



NAME: pab-miR11499b-5p  
SEQ: TGAAAGGCCACAGTAGGTGATG  
LENGTH: 22



NAME: pab-miR1150  
SEQ: TATGCCTGCTTGTAGATCTGTT  
LENGTH: 22

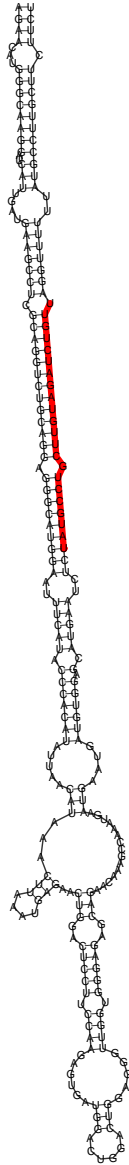

NAME: pab-miR11501  
SEQ:TATTGGAAAGGCGAGTTGGCT  
LENGTH: 21

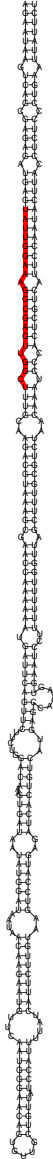

NAME: pab-miR11502  
SEQ:TATTGGATTGAGAATAGATC  
LENGTH: 20

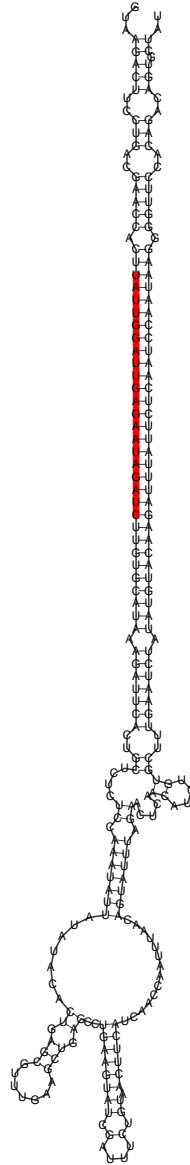

NAME: pab-miR11503  
SEQ:TCAAATAGAAAACAATGGACC  
LENGTH: 21

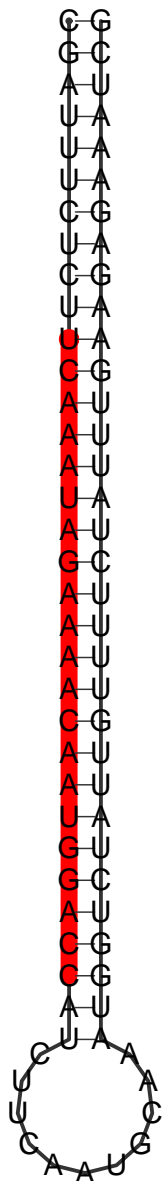

NAME: pab-miR11504

SEQ:TCAACATGAGGAGGAGCTCATT

LENGTH: 22

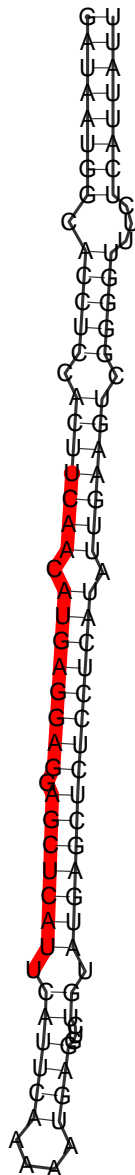



NAME: pab-miR11505  
SEQ: TCAAGTGTTTCTGGACTCACC  
LENGTH: 21

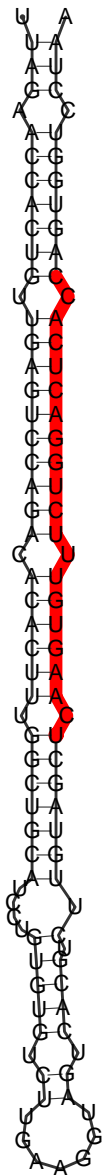

NAME: pab-miR11506  
SEQ:TCACAAAACACCGGAATAATCT  
LENGTH: 22

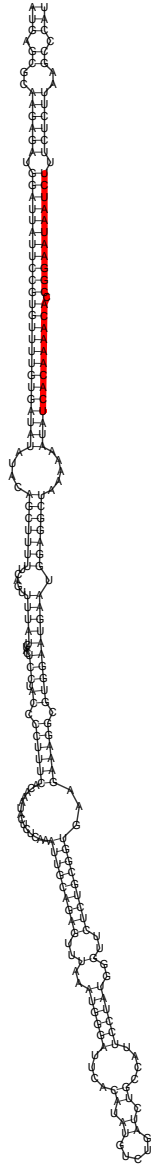

NAME: pab-miR11507  
SEQ:TCACGATGATCAGTAATCACTG  
LENGTH: 22

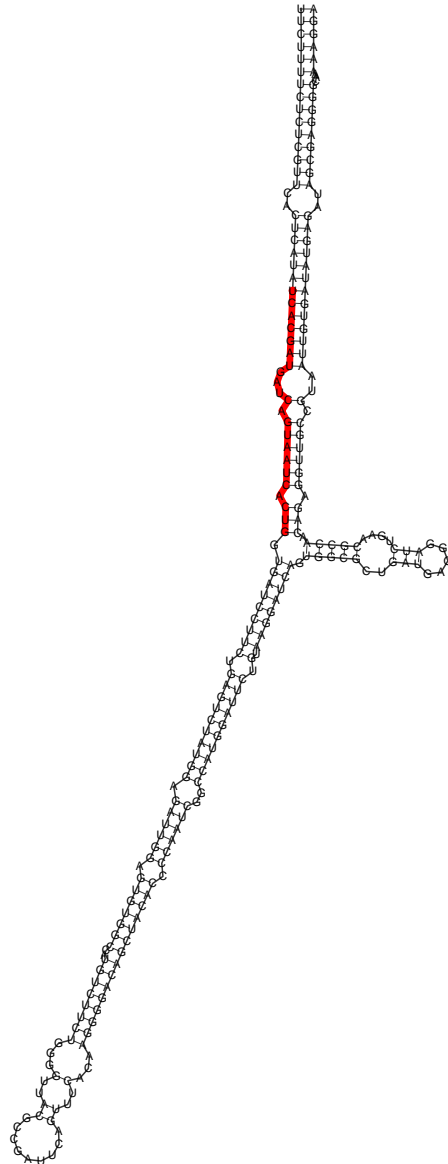

NAME: pab-miR11508  
SEQ: TCACTGAAGAATTATGCCACT  
LENGTH: 21

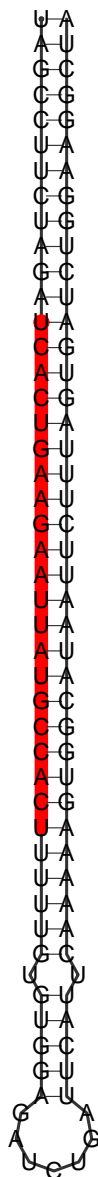

NAME: pab-miR11509  
SEQ:TCATGAGCATTGTGGATGATC  
LENGTH: 21

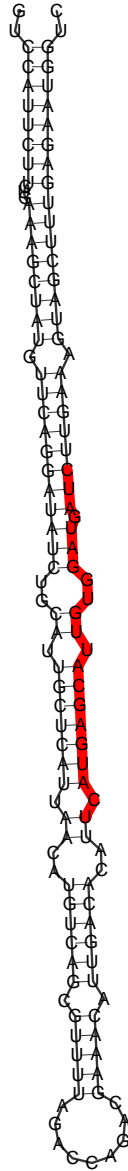

NAME: pab-miR11510  
SEQ:TCATTGTCGCAGTTCTCGTAGT  
LENGTH: 22

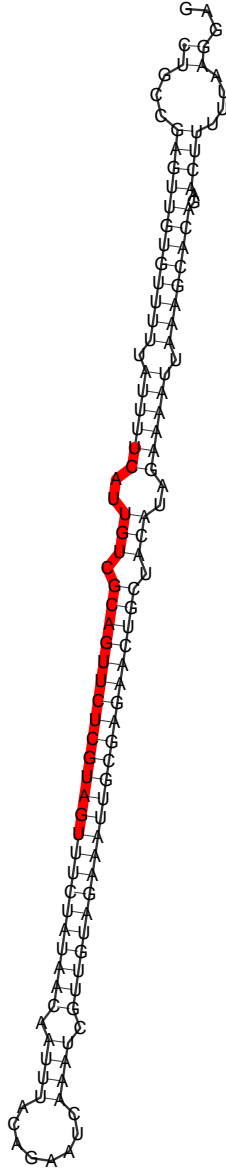

NAME: pab-miR11511  
SEQ: TCCAACGAAGATCAGAAGGCTT  
LENGTH: 22

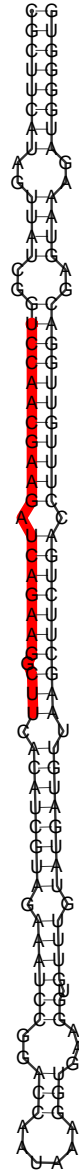

NAME: pab-miR11512  
SEQ:TCCCCATCTTGTGCACTTGC  
LENGTH: 21

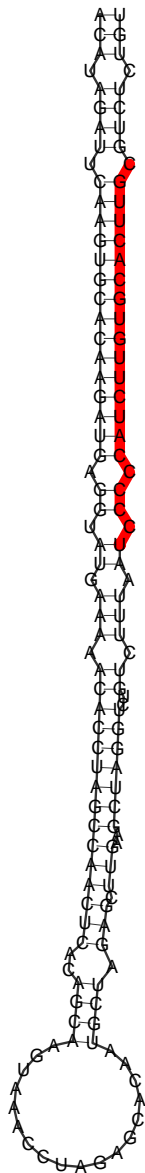



NAME: pab-miR11513-3p

SEQ:TCCGCATGTAGAGCATTAAATG

LENGTH: 22

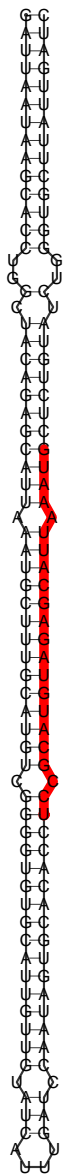



NAME: pab-miR11514  
SEQ:TCCTCTACCGTCAAAATCTTC  
LENGTH: 21

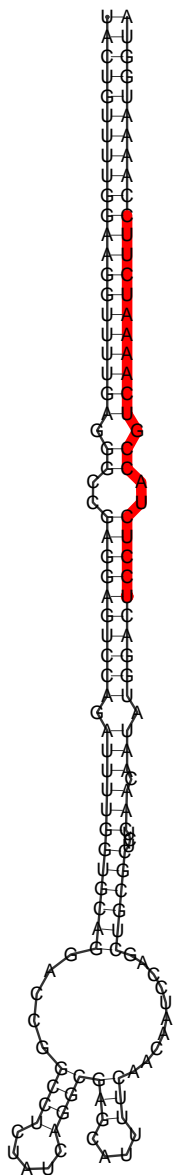

NAME: pab-miR11515a  
SEQ:TCGAACAGCTACAGCTACAATG  
LENGTH: 22

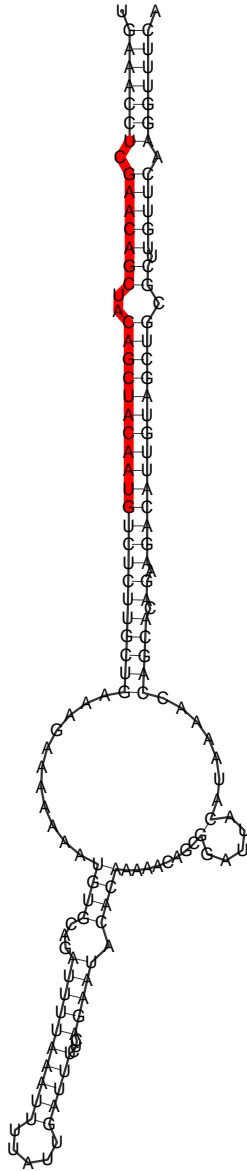

NAME: pab-miR11515b  
SEQ: TTGTAGCTGCACTTGTTCAAG  
LENGTH: 21

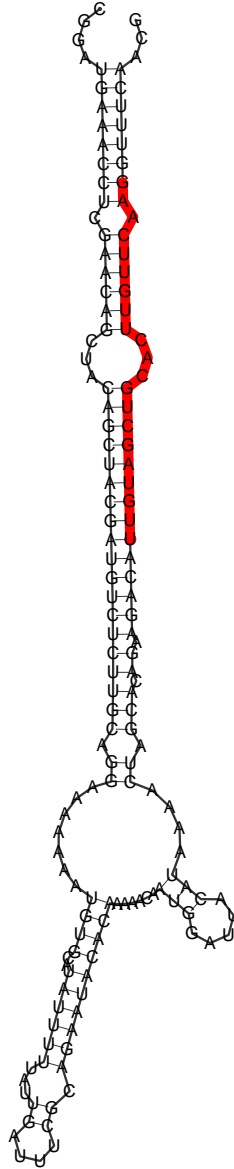

NAME: pab-miR11516  
SEQ:TCGAAGTCCGTAAGAGAAGCC  
LENGTH: 21

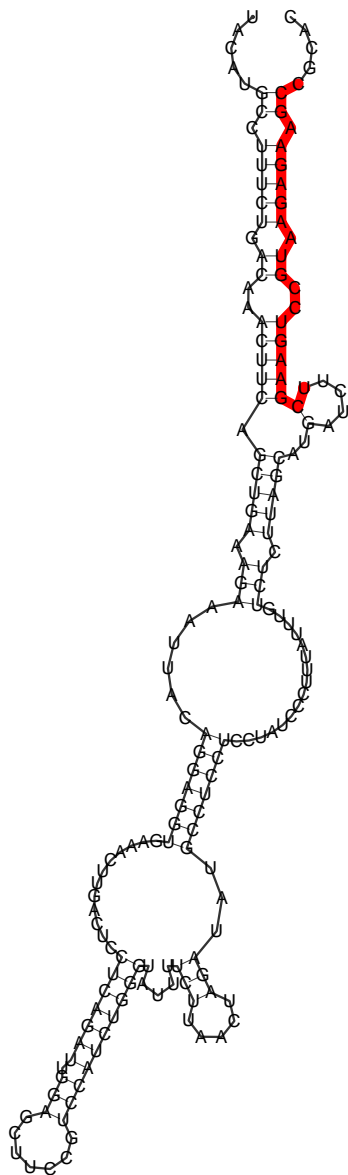

NAME: pab-miR11517  
SEQ:TCGATGTTGAATTTTGGCAAC  
LENGTH: 21

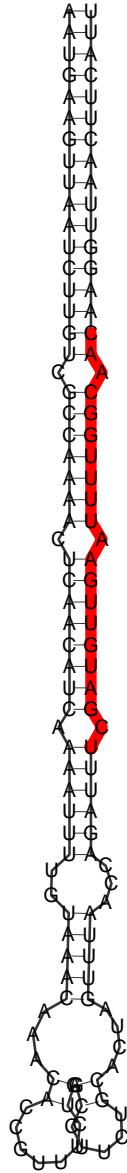

NAME: pab-miR11518  
SEQ:TCGGGCTTTCGAATCAATACC  
LENGTH: 21

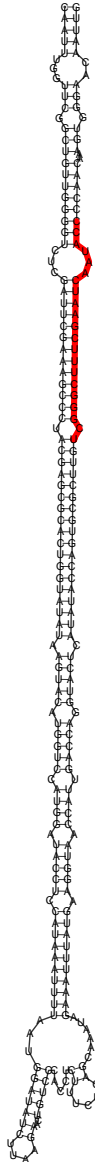



NAME: pab-miR11519  
SEQ:TCGTAAAACACAGGAATGATGG  
LENGTH: 22

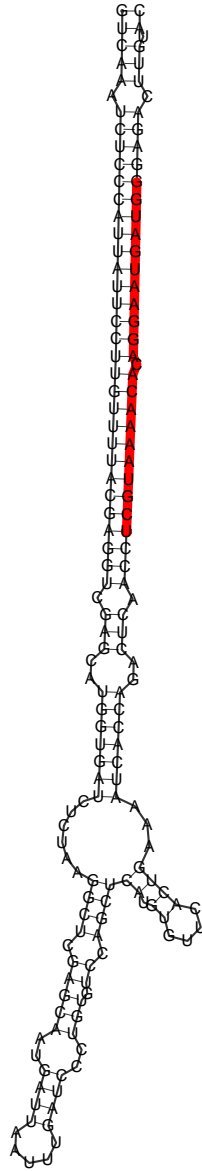

NAME: pab-miR11520  
SEQ:TCGTTGGGATCTTTTCTGCCT  
LENGTH: 21

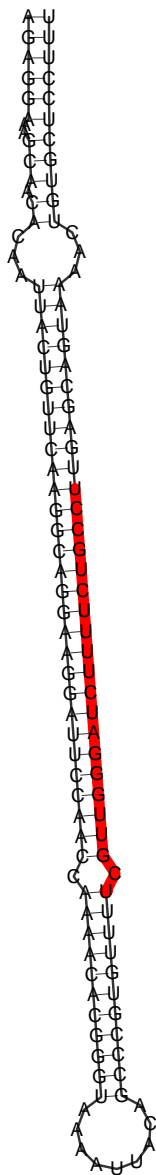

NAME: pab-miR11521  
SEQ:TCTAGGGGCTCTTTAACATCC  
LENGTH: 21

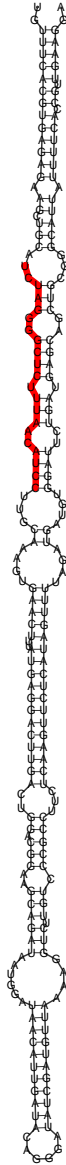

NAME: pab-miR11522  
SEQ:TCTATGTACTCTGCAGTGGCA  
LENGTH: 21

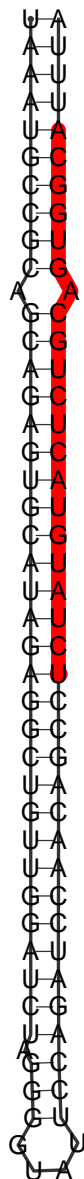



NAME: pab-miR11523b  
SEQ:TCTGAGCAGATTCAATGCCCGA  
LENGTH: 22

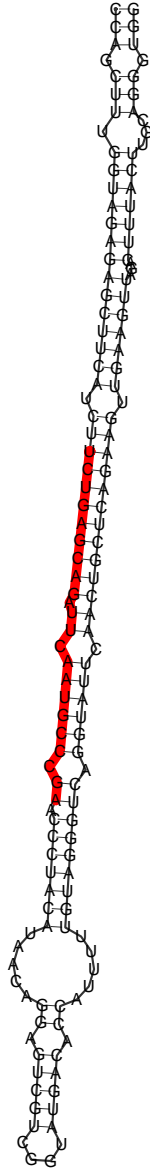

NAME: pab-miR11523c  
SEQ:TCTGAGCAGATTTAATGCCCGA  
LENGTH: 22

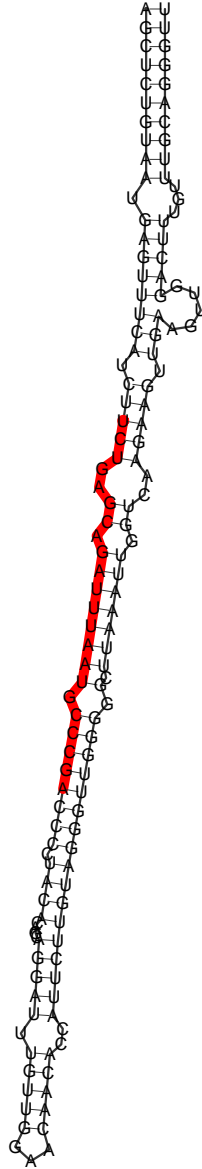

NAME: pab-miR11523d  
SEQ:TCTGAGCAGATTTAATGCCCGA  
LENGTH: 22

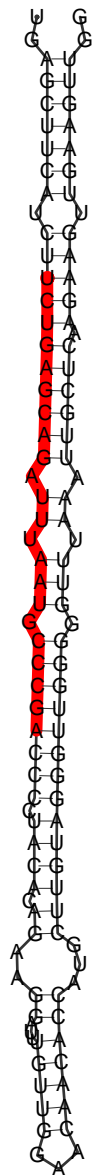



NAME: pab-miR11524  
SEQ:TCTCCGGCGGCGTTCTTTGCTG  
LENGTH: 22

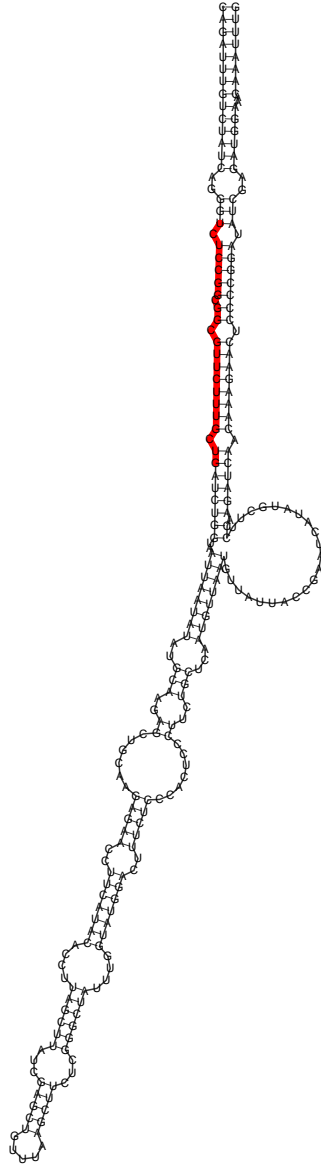

NAME: pab-miR11525a  
SEQ:TCTCGAGGACCATATCAGACC  
LENGTH: 21

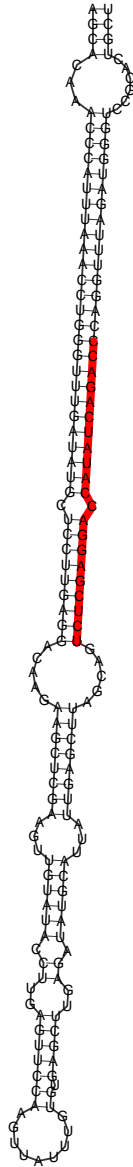

NAME: pab-miR11525b  
SEQ:TCTCGAGGACCATATCAGACC  
LENGTH: 21

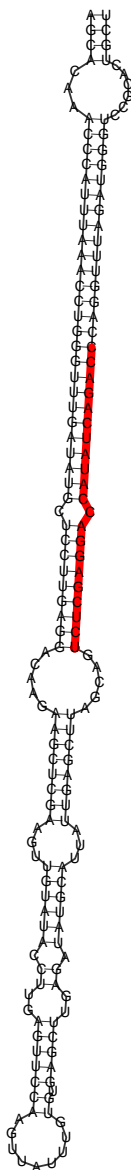

NAME: pab-miR11526  
SEQ:TCTCTGCTGCGTATCGACTCC  
LENGTH: 21

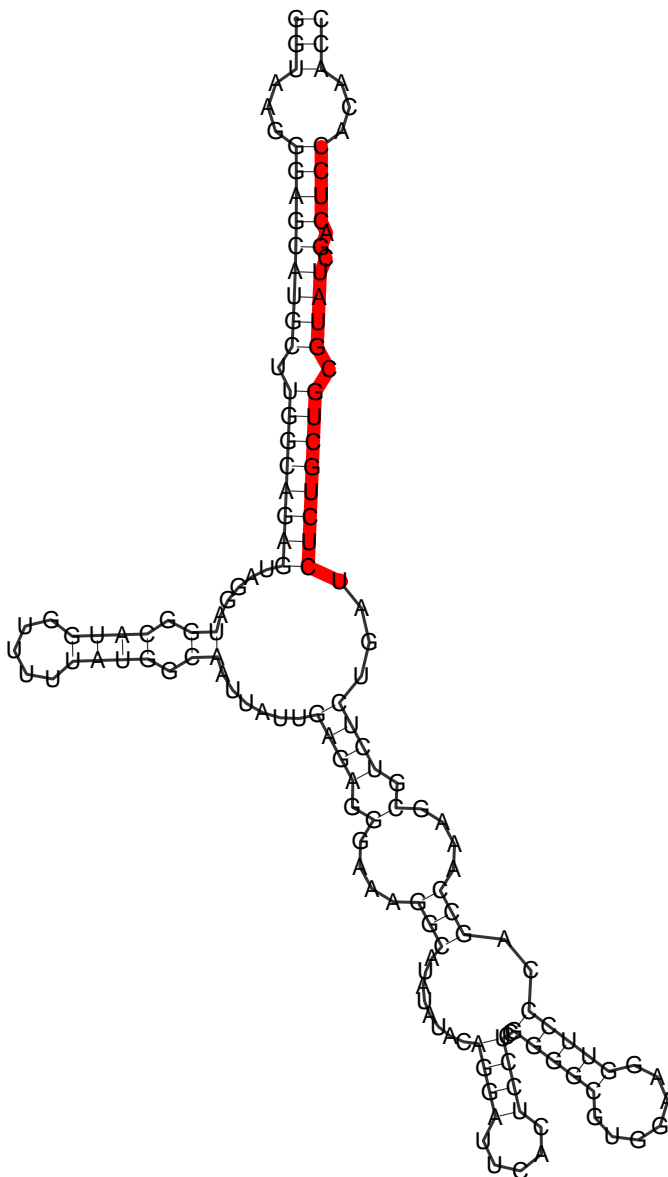

NAME: pab-miR11527  
SEQ:TCTGAGTAAAGGCACGTTCGG  
LENGTH: 21

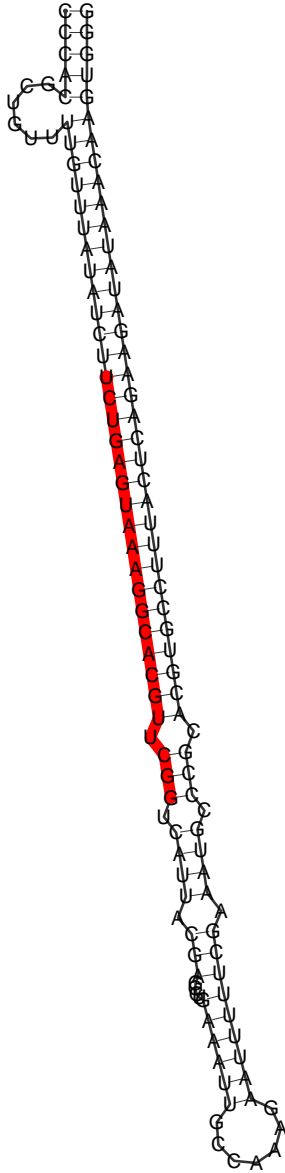

NAME: pab-miR11528  
SEQ:TCTGGCAACATCCTCTATTTCA  
LENGTH: 22

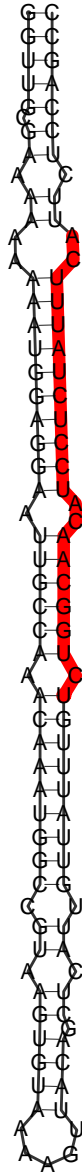

NAME: pab-miR11529a  
SEQ:TCTTATCTTTGAAAGTGCTAGC  
LENGTH: 22

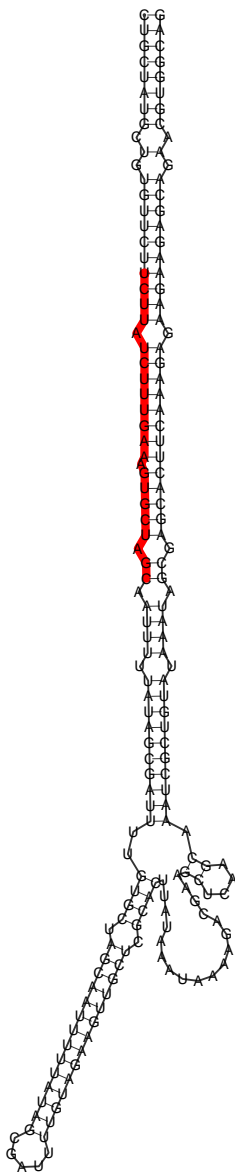

NAME: pab-miR11529b  
SEQ: TCTTATCTTTGAAAGTGCTAGC  
LENGTH: 22

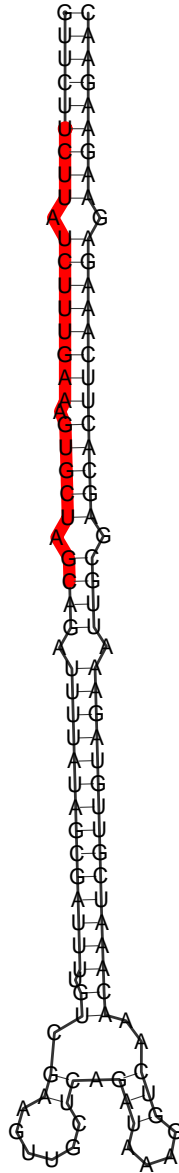



NAME: pab-miR11529c  
SEQ: TCTTATCTTTGAAAGTGCTAGC  
LENGTH: 22

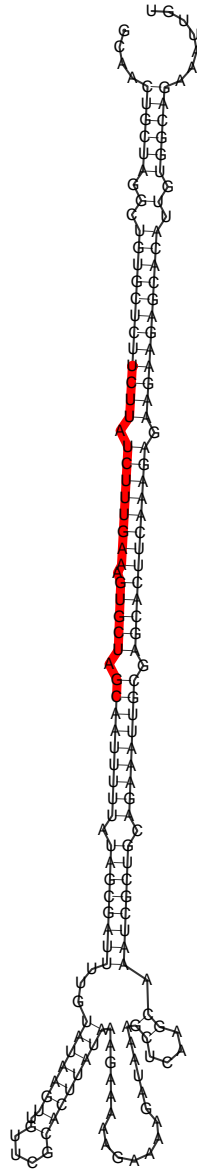

NAME: pab-miR11530  
SEQ:TCTTCATGGACCTCCTTGCC  
LENGTH: 20

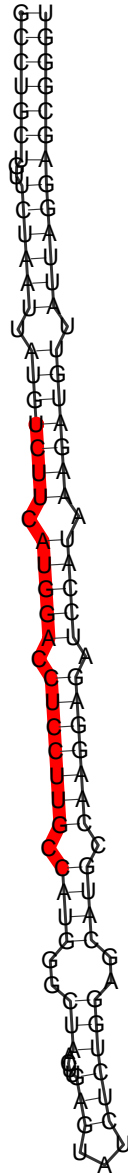

NAME: pab-miR11531  
SEQ:TCTTTCGAGTTTACTGGGCT  
LENGTH: 20

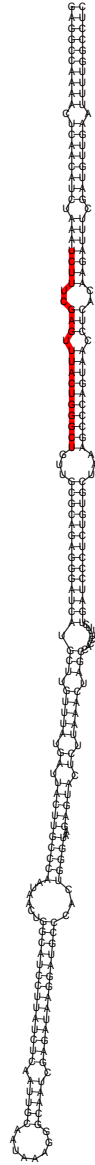

NAME: pab-miR11532  
SEQ: TGACATTGTAAAAGACGGGAAT  
LENGTH: 22

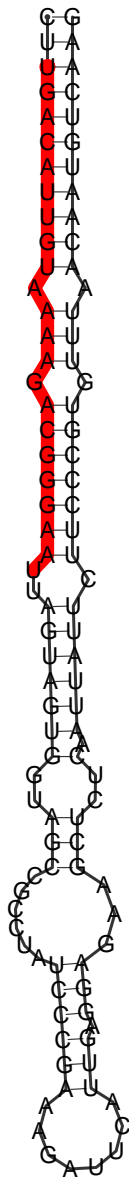

NAME: pab-miR11533a  
SEQ: TGAGAATTATCATCTGTATG  
LENGTH: 20

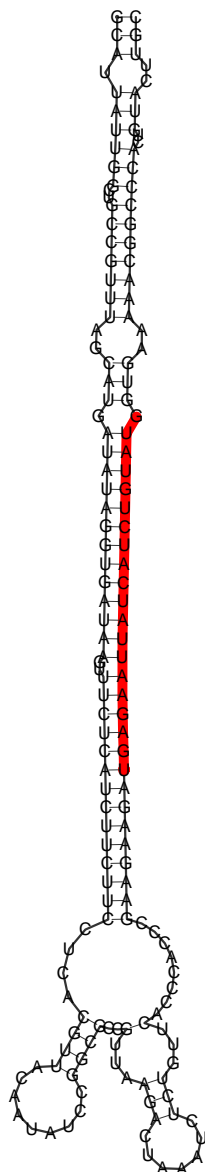

NAME: pab-miR11533b  
SEQ: TGATAAGTTTCTCATCTTCCT  
LENGTH: 21

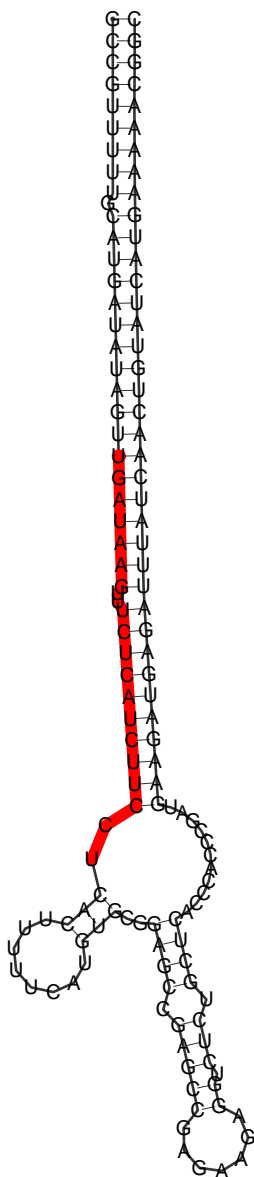

NAME: pab-miR11534  
SEQ: TGAGATTGTTGGAGAGGTTCA  
LENGTH: 21

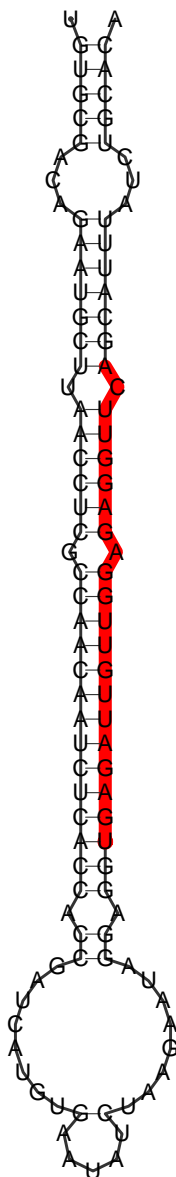

NAME: pab-miR11535  
SEQ: TGAGCCGCTTTTGGATGTGACG  
LENGTH: 22

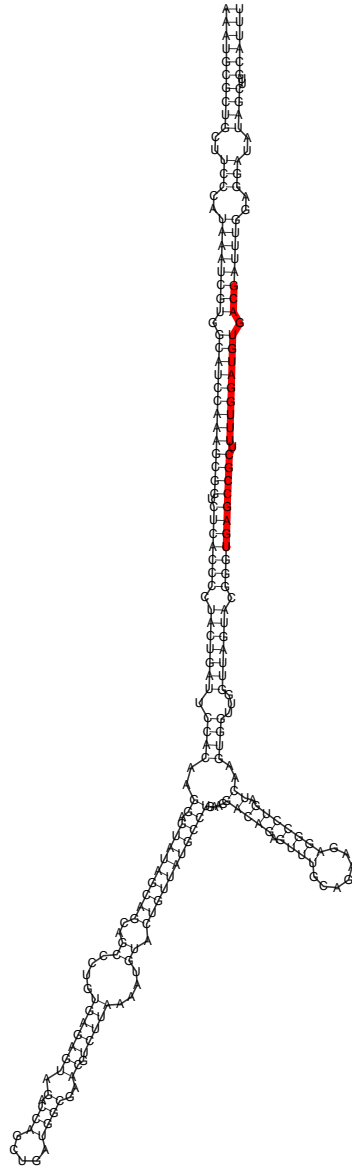



NAME: pab-miR11536  
SEQ: TGAGGACATGTGATTTGGATG  
LENGTH: 21

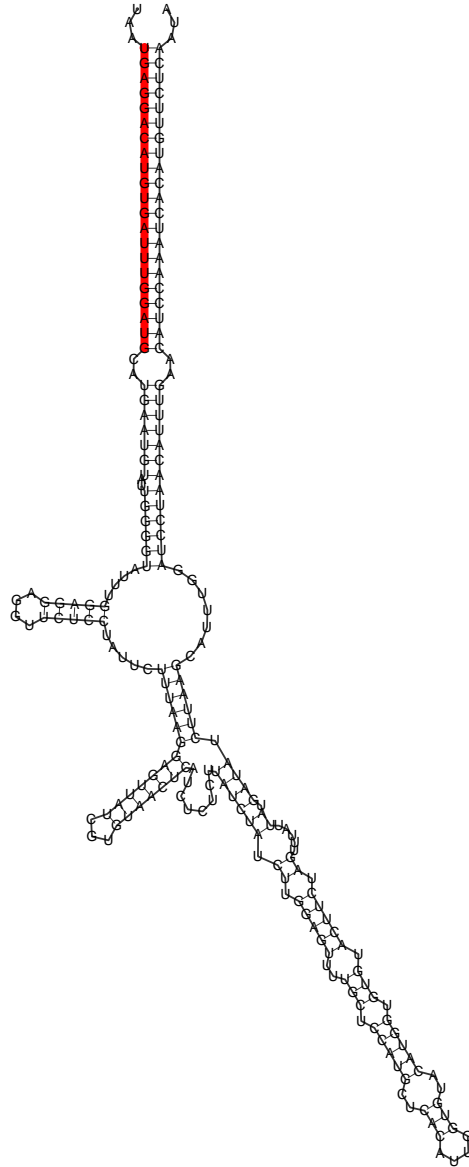

NAME: pab-miR11537  
SEQ: TGATCAGTATTGCCTTGGATG  
LENGTH: 21

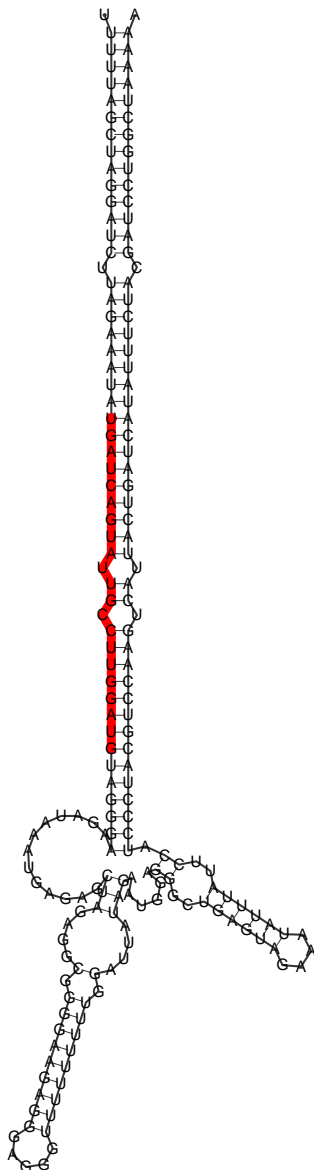

NAME: pab-miR11538  
SEQ: TGCAGACTGTGTGTGGACAAG  
LENGTH: 21

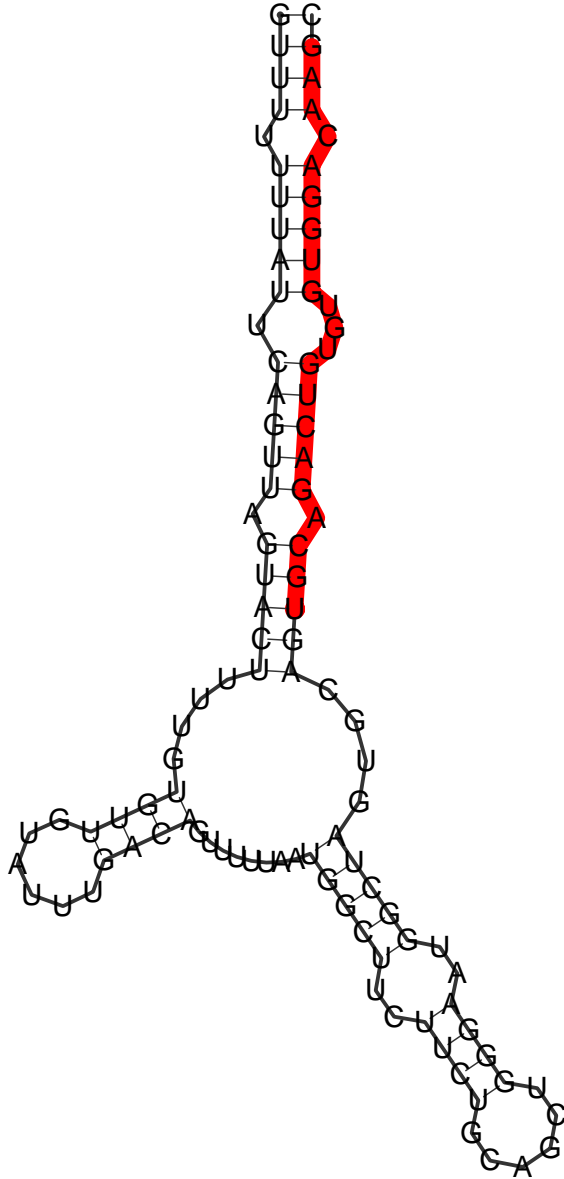

NAME: pab-miR11539a  
SEQ:TGCAGCAGGTGGATTATAGAC  
LENGTH: 21

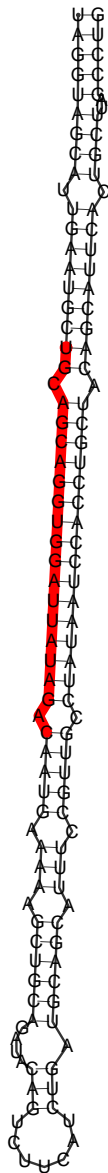

NAME: pab-miR11539b  
SEQ: TCGGCAGGTAGATTATAGGT  
LENGTH: 21

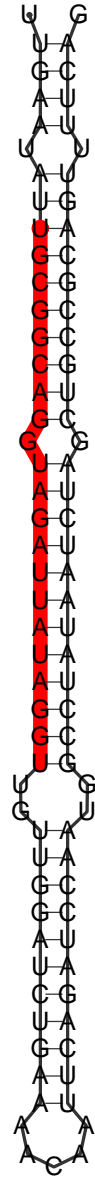

NAME: pab-miR11540  
SEQ: TGCCGAAGCCTGGAGGAATATC  
LENGTH: 22

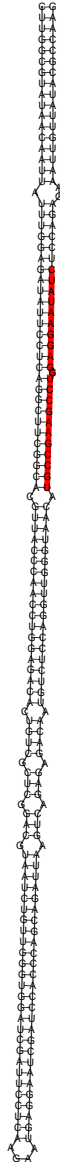

NAME: pab-miR11541  
SEQ: TGCCGCAGTCTTAAAGACCCTG  
LENGTH: 22

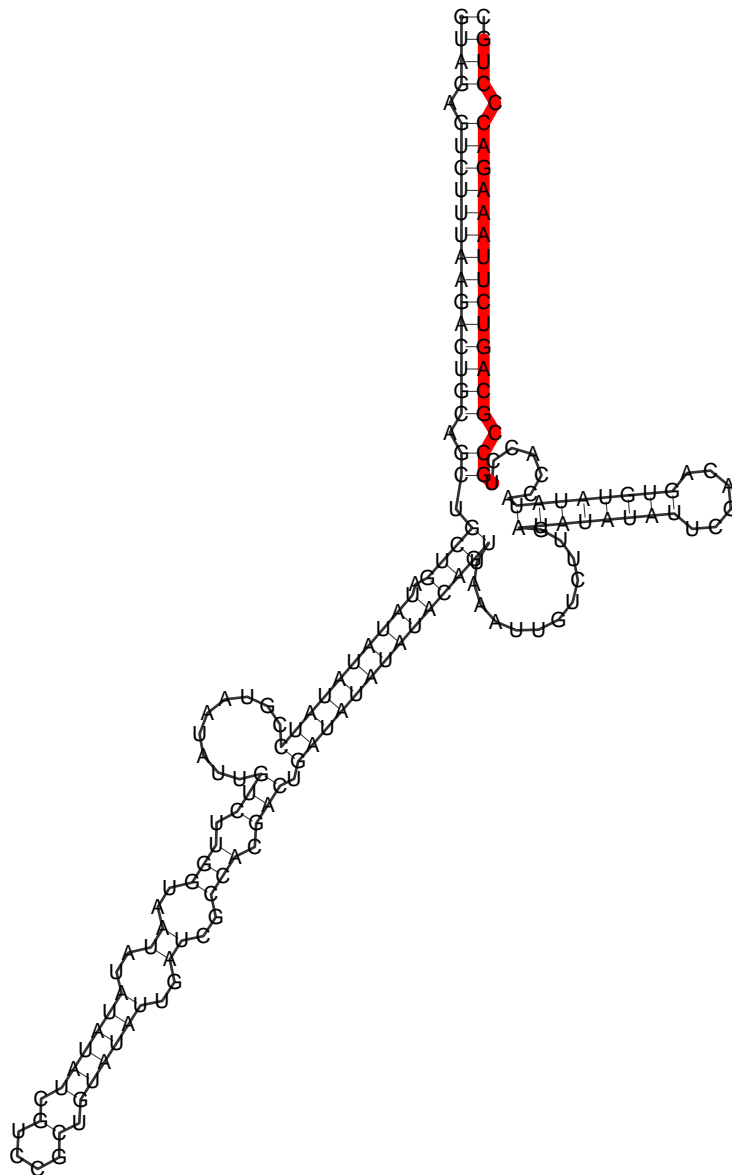

NAME: pab-miR11542  
SEQ:TGCGGAGCTTTTCAAAAATTC  
LENGTH: 21

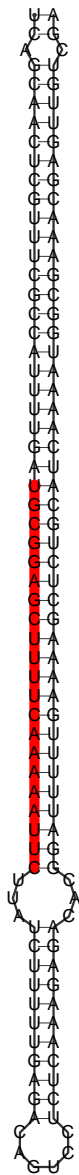



NAME: pab-miR11543  
SEQ: TGCTGCCTCACTACATCATGG  
LENGTH: 21

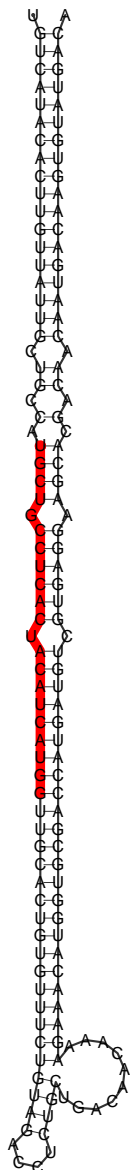

NAME: pab-miR11544  
SEQ: TGGAGCTGTTGTCACTCCACT  
LENGTH: 21

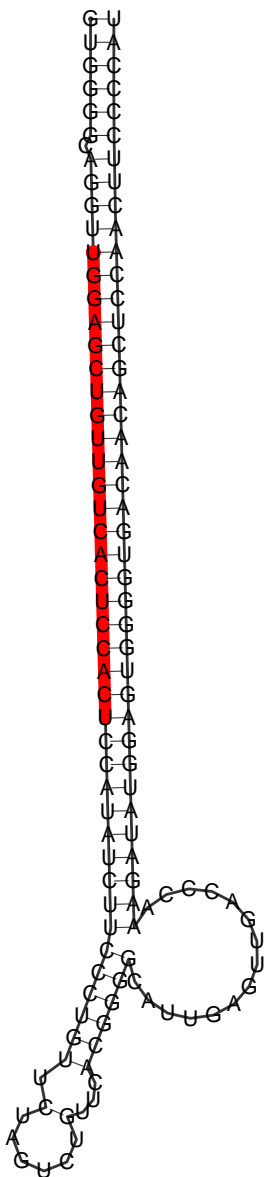

NAME: pab-miR11545  
SEQ:TGGGCGTTTGGTGATAACATC  
LENGTH: 21

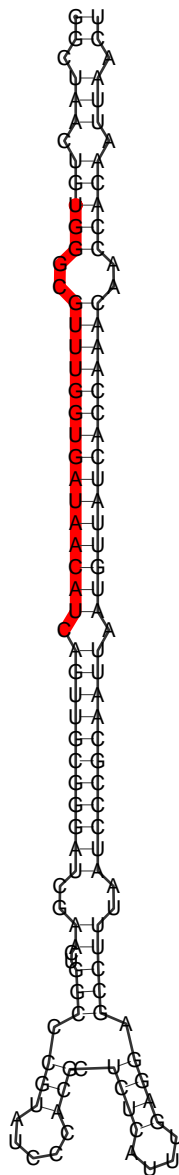

NAME: pab-miR11546a  
SEQ: TGGTACGGGTTGAAGTAGCACC  
LENGTH: 22

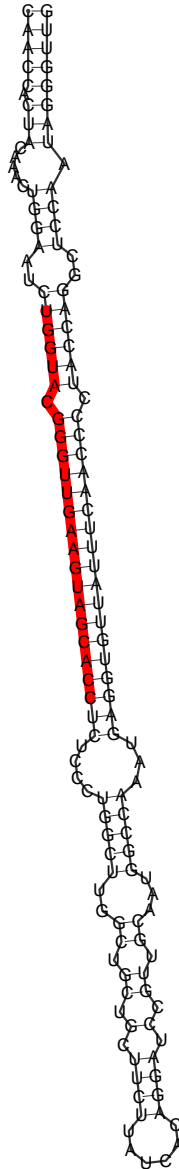

NAME: pab-miR11546b  
SEQ: TGGTATGGGTTGAAGTAGCACC  
LENGTH: 22

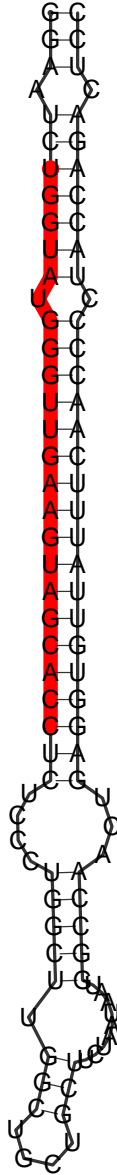

NAME: pab-miR11546c  
SEQ: TGGTATGGGTTGAAGTAGCACC  
LENGTH: 22

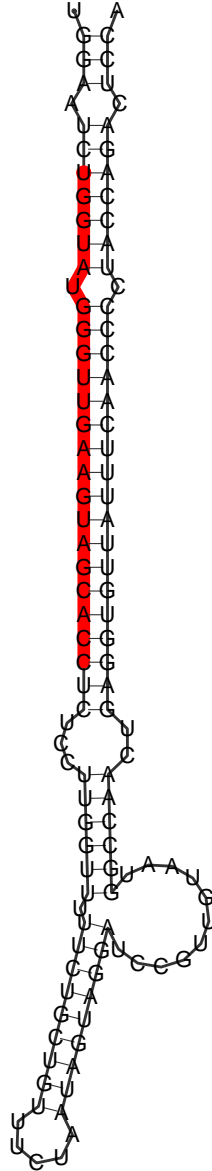

NAME: pab-miR11546d  
SEQ: TGGTATGGGTTGAAGTAGCACC  
LENGTH: 22

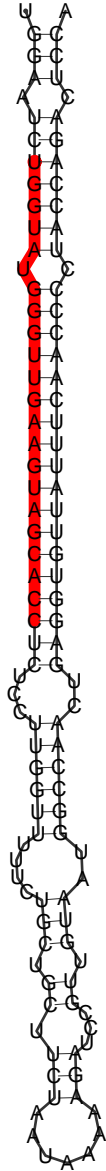

NAME: pab-miR11546e  
SEQ: TGGTATGGGTTGAAGTAGCACC  
LENGTH: 22

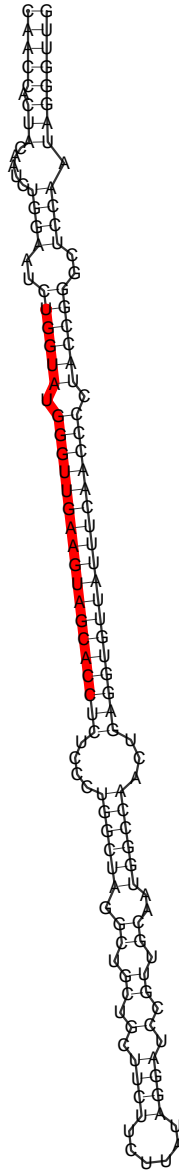



NAME: pab-miR11546f  
SEQ: TTGAAGGAACACCTCTGCTTGA  
LENGTH: 22

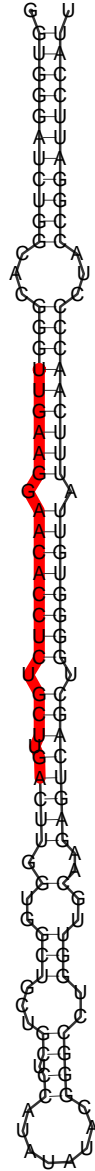

NAME: pab-miR11547  
SEQ: TGTAGGGCCAGAATGTCTTATG  
LENGTH: 22

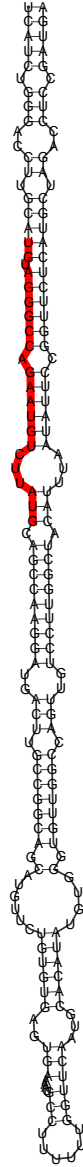

NAME: pab-miR11548  
SEQ: TGTAGTTTTTCGCTGTCGGCCT  
LENGTH: 21

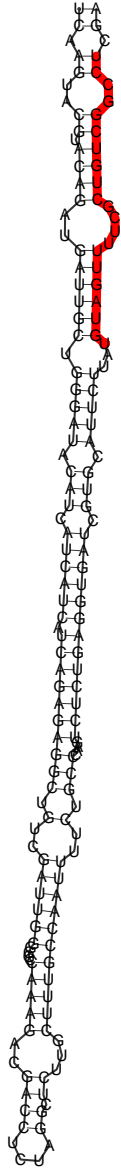

NAME: pab-miR11549  
SEQ: TGTGAGCAAGTCATTCTGGCC  
LENGTH: 21

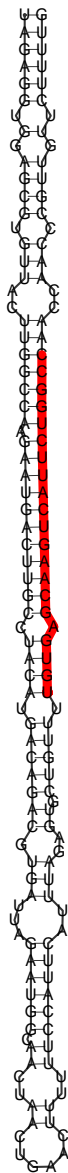

NAME: pab-miR11550  
SEQ: TGTGGCGAACAAGTAACTCATT  
LENGTH: 22

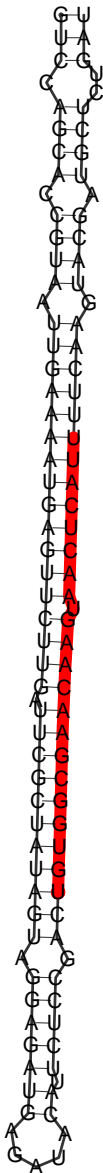

NAME: pab-miR11551a  
SEQ: TGTTTGTGTTTCCCTCCGCAAT  
LENGTH: 22

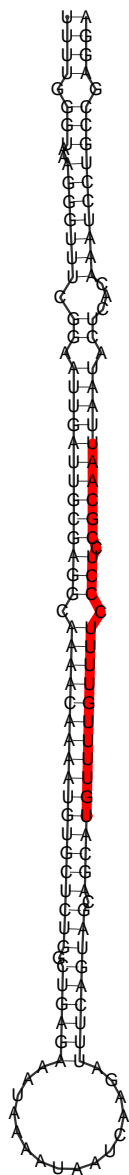

NAME: pab-miR11551b  
SEQ: TTTTCCTCCGCAATTGATACTG  
LENGTH: 22

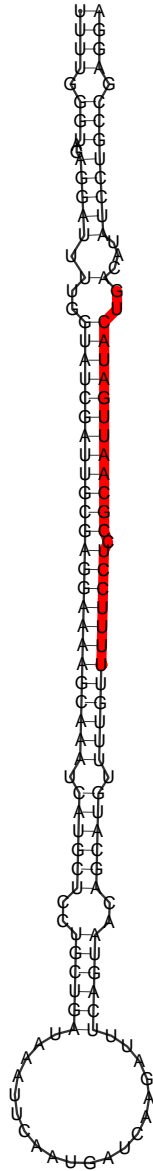

NAME: pab-miR11552  
SEQ: TGTTTTTCGACGTTTTGGACC  
LENGTH: 21

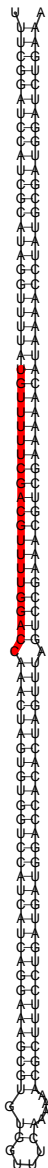



NAME: pab-miR1153  
SEQ: TTAAAATAAGTTGGATACTCC  
LENGTH: 21

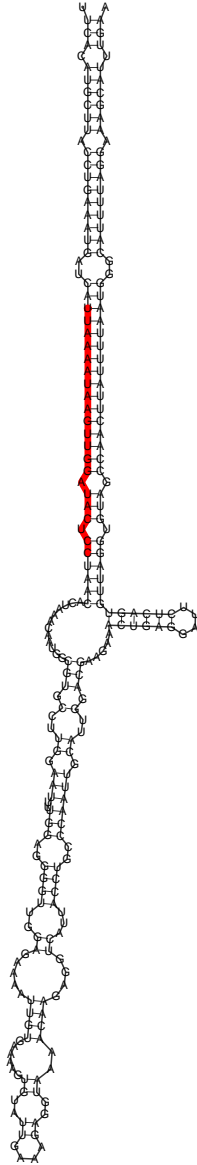

NAME: pab-miR11554  
SEQ: TTAAAGATTCTGCAGCAAAC  
LENGTH: 21

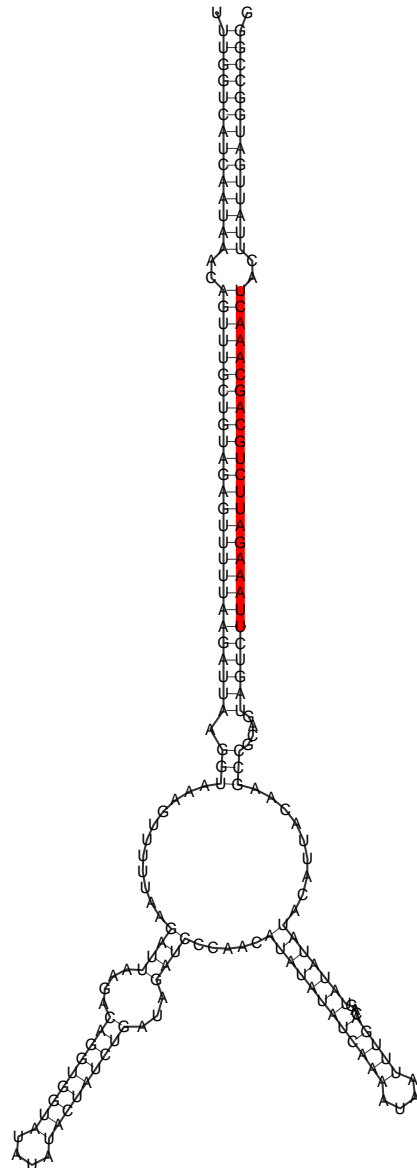

NAME: pab-miR1155  
SEQ: TTA ACTCCGGATCTTTTAAGC  
LENGTH: 21

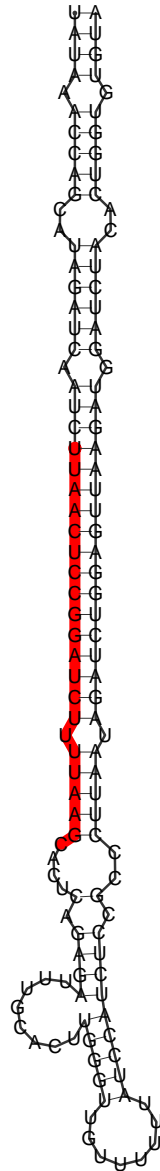

NAME: pab-miR11556  
SEQ: TTAGAACTGCTGCTCCCGAGG  
LENGTH: 21

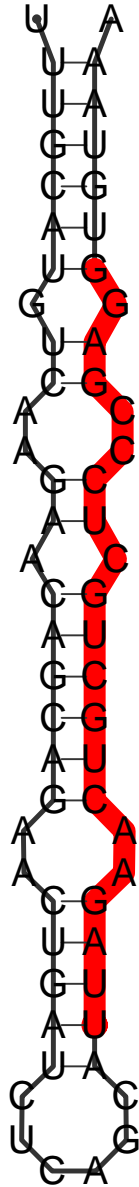

NAME: pab-miR11557  
SEQ: TTAGATTCCGGATCAACGTAGC  
LENGTH: 22

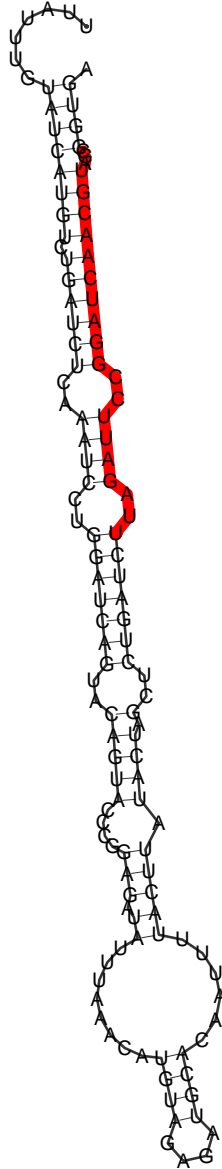

NAME: pab-miR11558  
SEQ:TTAGGACAACGACAAATCACC  
LENGTH: 21

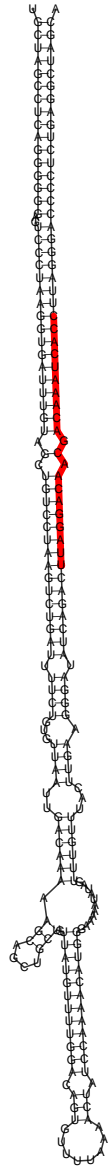

NAME: pab-miR11559  
SEQ: TTATTATTCTCTTGATGGCCC  
LENGTH: 21

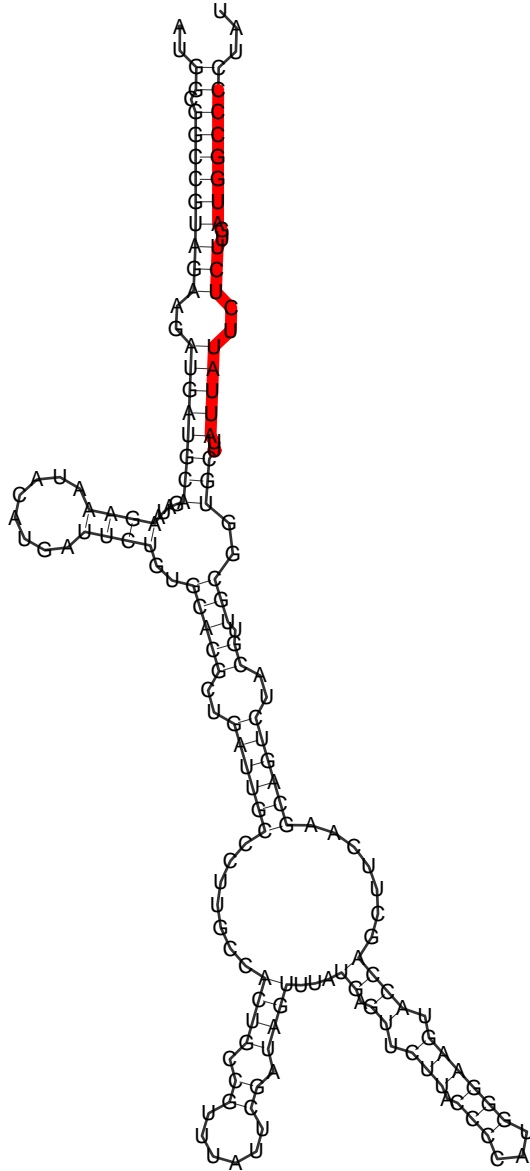

NAME: pab-miR11560  
SEQ: TTCCATTGCTTGCACACGCTG  
LENGTH: 21

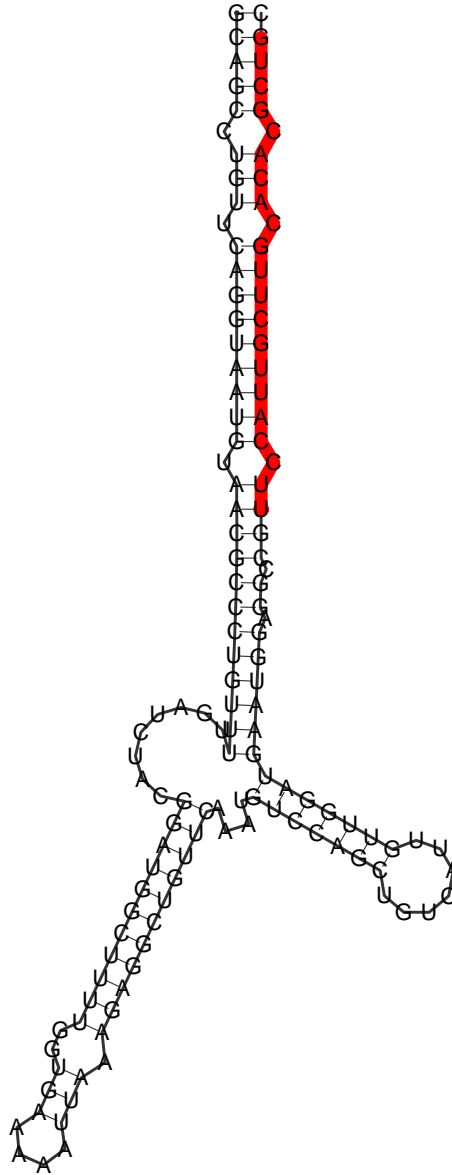



NAME: pab-miR11561  
SEQ: TTCCTTTGTAGACTAATCCAA  
LENGTH: 21

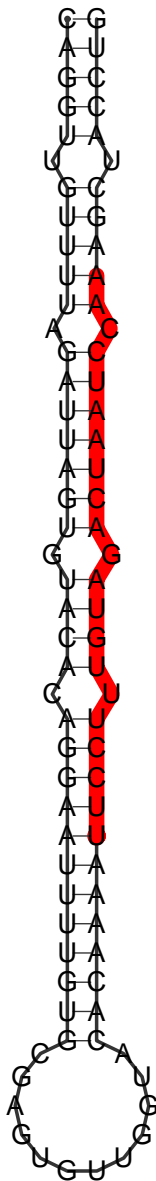

NAME: pab-miR11562a-1  
SEQ: TTCTGATAATGCTTCACCCTC  
LENGTH: 21

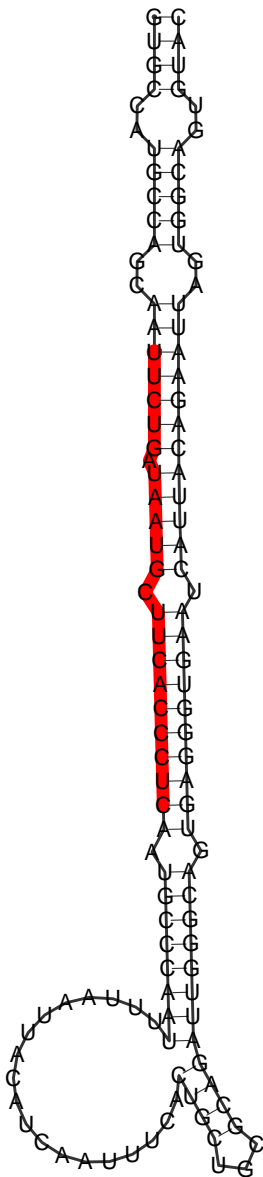

NAME: pab-miR11562a-2

SEQ: TTCTGATAATGCTTCACCCTCA

LENGTH: 22

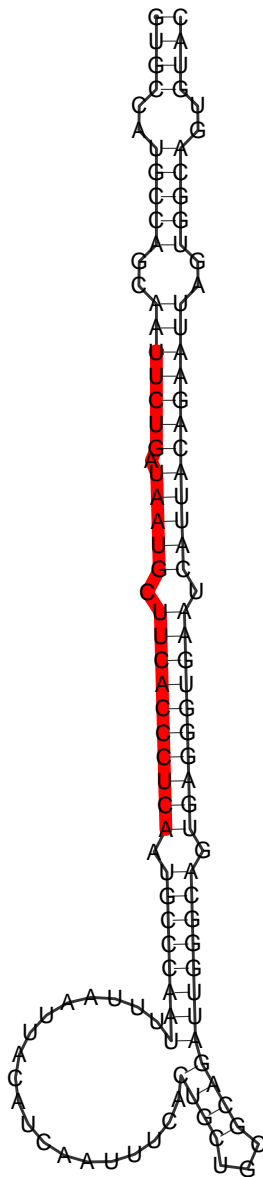

NAME: pab-miR11562b-1  
SEQ: TTCTGATAATGCTTCACCCTC  
LENGTH: 21



NAME: pab-miR11562b-2  
SEQ: TTCTGATAATGCTTCACCCTCA  
LENGTH: 22

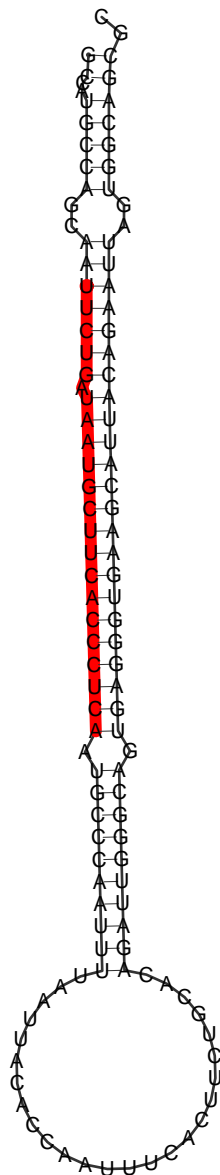

NAME: pab-miR11562c  
SEQ: TTCTGATAATGCTTCACCCTCA  
LENGTH: 22

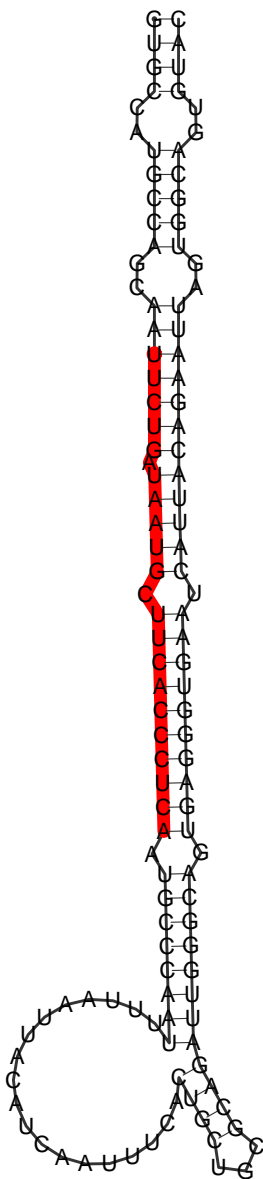

NAME: pab-miR11563  
SEQ: TTCTGATATTTTGTGGCTAGC  
LENGTH: 21

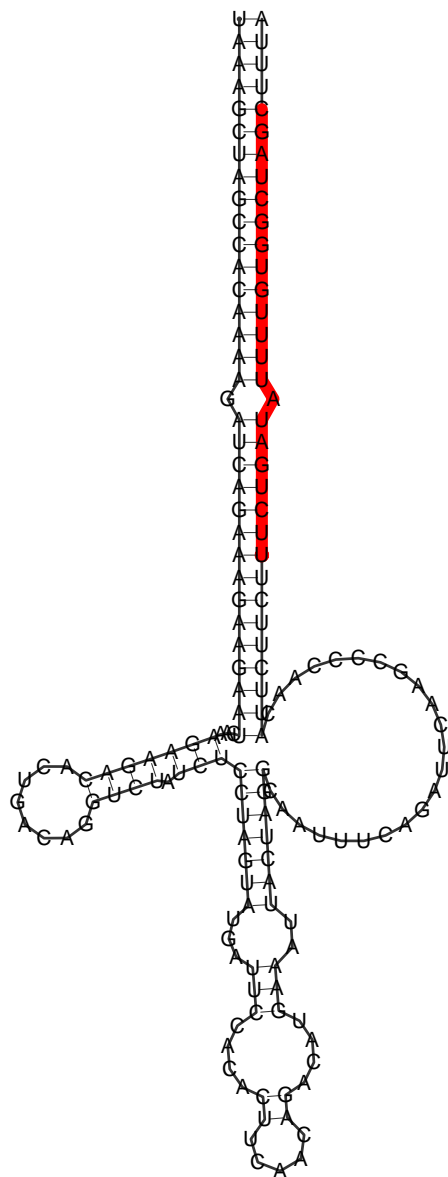

NAME: pab-miR11564a  
SEQ: TTGACCACAAAATCCACATTG  
LENGTH: 21

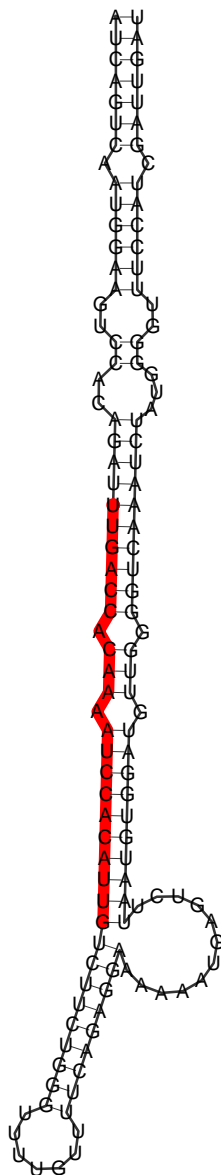



NAME: pab-miR11564b  
SEQ: TTGACCACAAAATCCACATTG  
LENGTH: 21

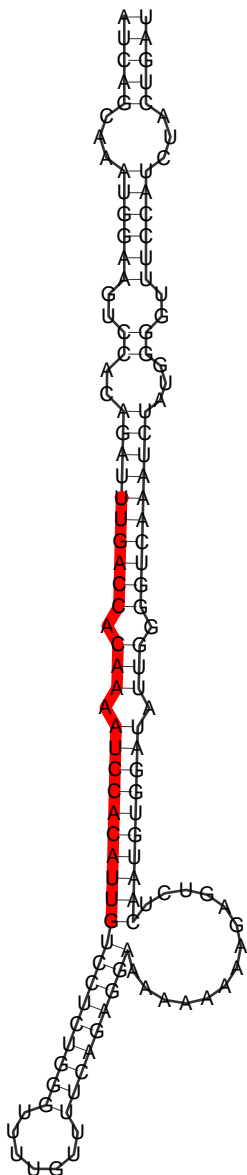

NAME: pab-miR11565  
SEQ: TTGAGCTTGGCCTTTGATCCT  
LENGTH: 21

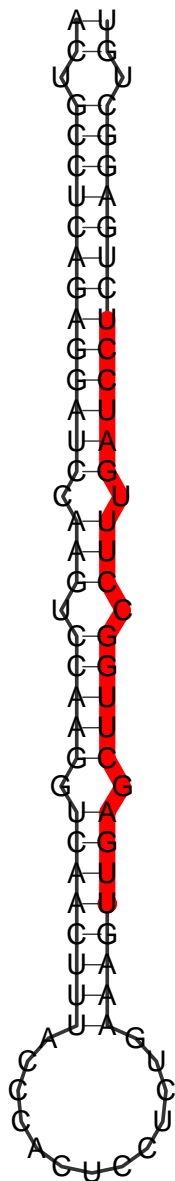

NAME: pab-miR11566  
SEQ: TTGATGTATGAGTTCAAGAGG  
LENGTH: 21

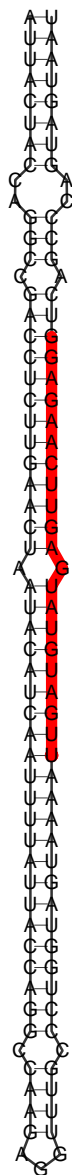

NAME: pab-miR11567  
SEQ: TTGCCAGGTCTGTTGAAGGAA  
LENGTH: 21

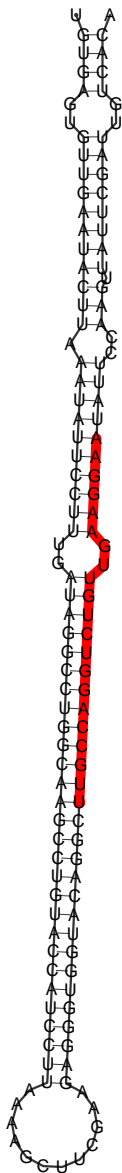

NAME: pab-miR11568  
SEQ:TTGCCCTGAGATCGTCAAGC  
LENGTH: 21

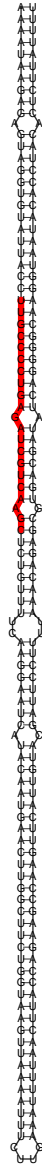

NAME: pab-miR11569  
SEQ: TTGCTCTATGTCCATTGGATG  
LENGTH: 21

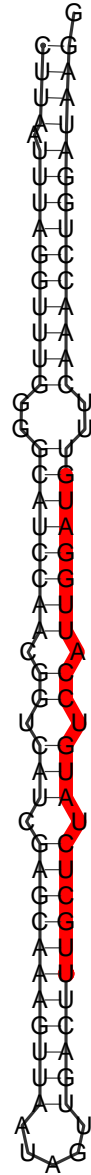

NAME: pab-miR11570a-1  
SEQ: TTGCTTGAGTAACTTGAACAC  
LENGTH: 21

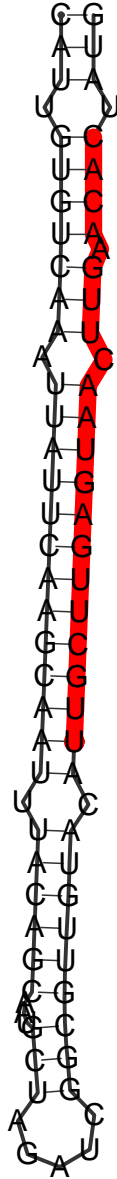

NAME: pab-miR11570a-2  
SEQ: TTGCTTGAGTAACTTGAACACT  
LENGTH: 22

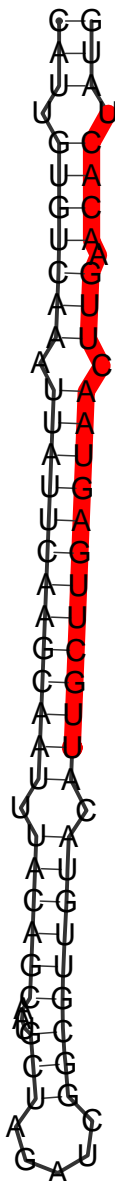



NAME: pab-miR11570b  
SEQ: TTGCTTGAGTAACTTGAACACA  
LENGTH: 22

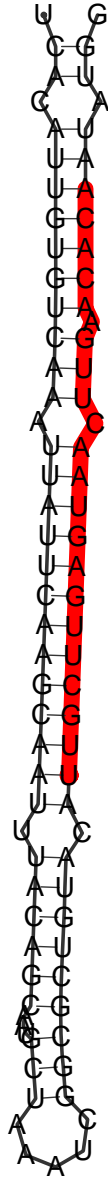

NAME: pab-miR11570c  
SEQ: TTGCTTGAGTAACTTGAACACA  
LENGTH: 22

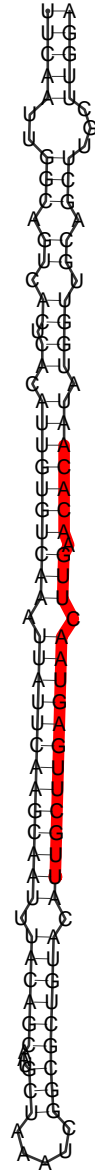

NAME: pab-miR11571  
SEQ: TTGATTTTCAGTTCCTCATC  
LENGTH: 21

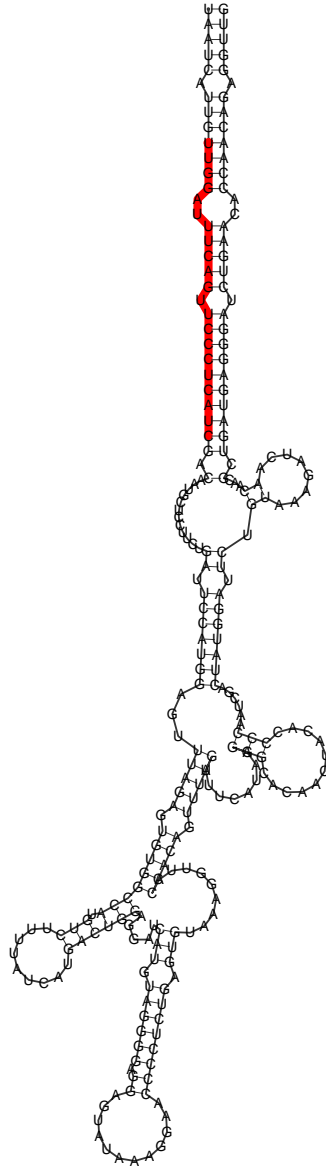

NAME: pab-miR11572  
SEQ: TTGGCTTGTCGCACCATAGCC  
LENGTH: 21

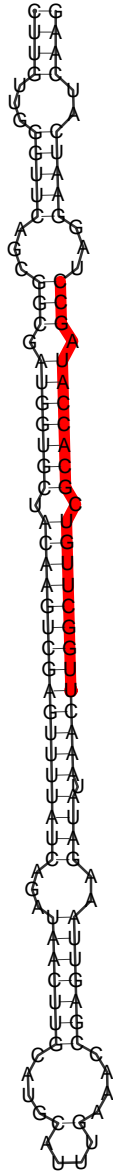

NAME: pab-miR11573a

SEQ: TTGGGGAGCGTATTGTAGATT

LENGTH: 21

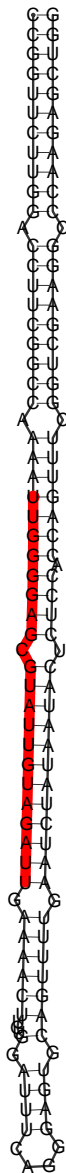

NAME: pab-miR11573b  
SEQ: TTGGGGAGCGTATTGTAGATT  
LENGTH: 21

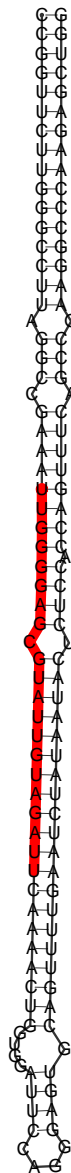

NAME: pab-miR11574  
SEQ: TTGTAAGATCTTTGACCCTTA  
LENGTH: 21

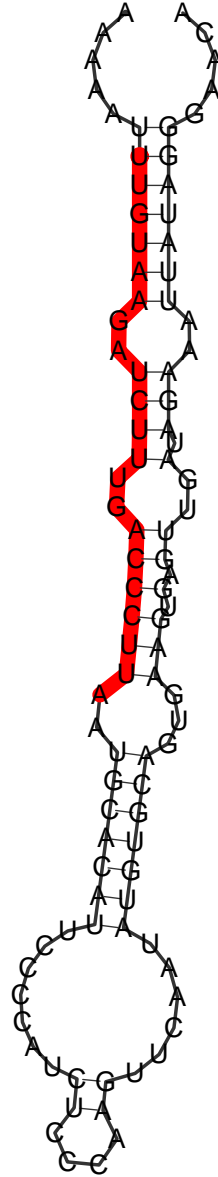

NAME: pab-miR11575  
SEQ: TTGTCAACTTTTAACTTACT  
LENGTH: 21

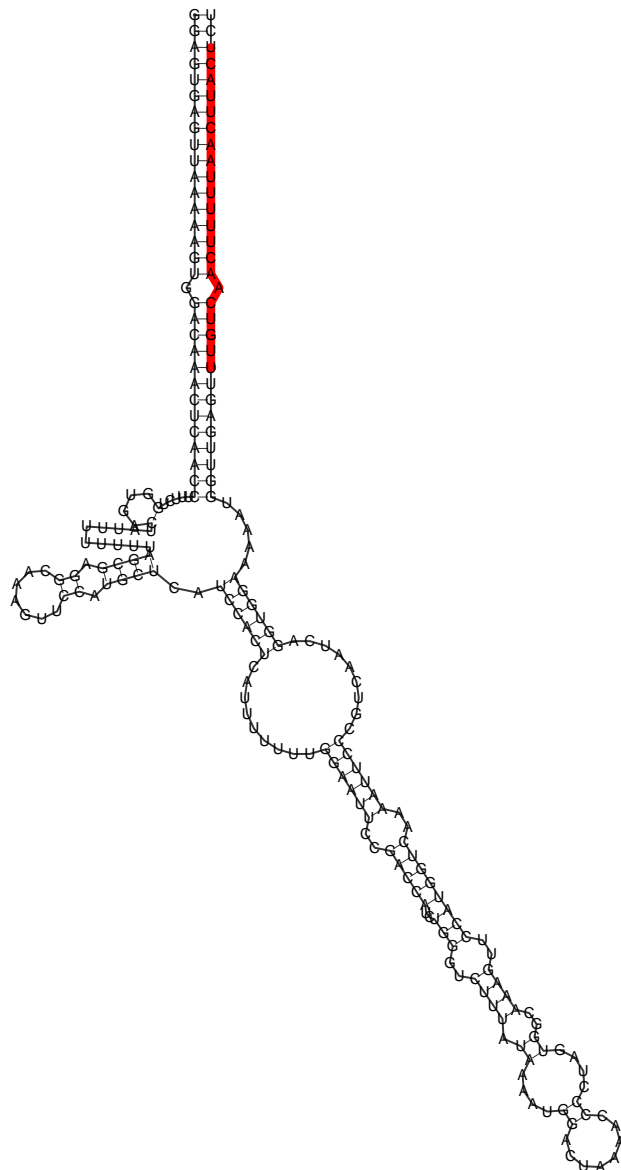



NAME: pab-miR11576  
SEQ: TTGTGGTTTGCATTTGAACTG  
LENGTH: 21

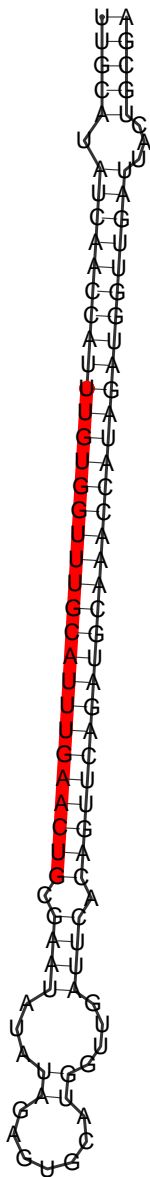

NAME: pab-miR11577  
SEQ: TTGTTTGAGATCCCTGGGCATG  
LENGTH: 22

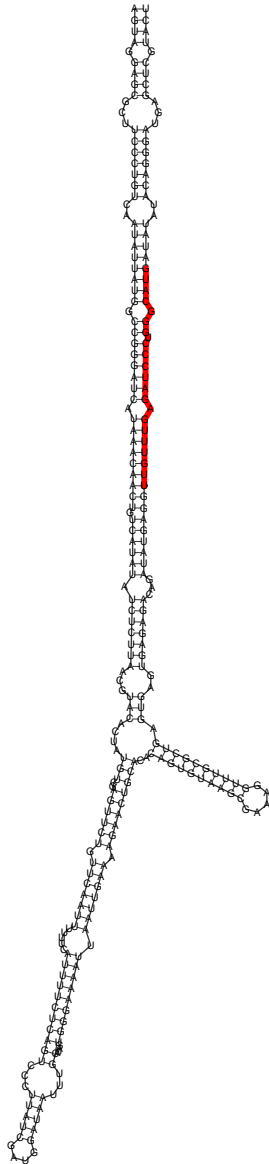

NAME: pab-miR11578  
SEQ:TTTAGGTTGCTTCTGTCCACT  
LENGTH: 21

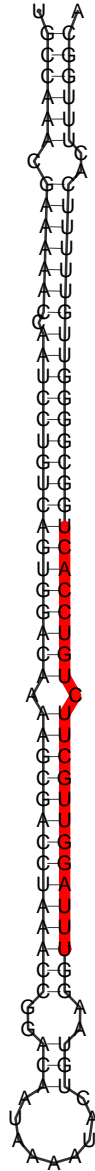

NAME: pab-miR11579  
SEQ: TTTCGGACTACTCAAGCGCAG  
LENGTH: 21

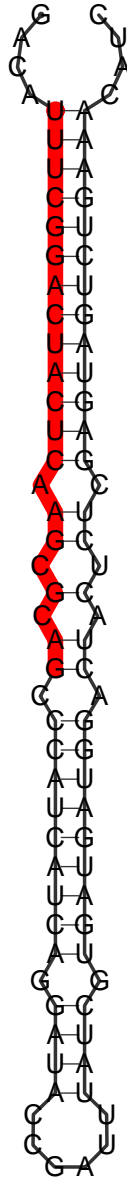

NAME: pab-miR11580  
SEQ:TTTGGATTATTGGGTTGCATC  
LENGTH: 21

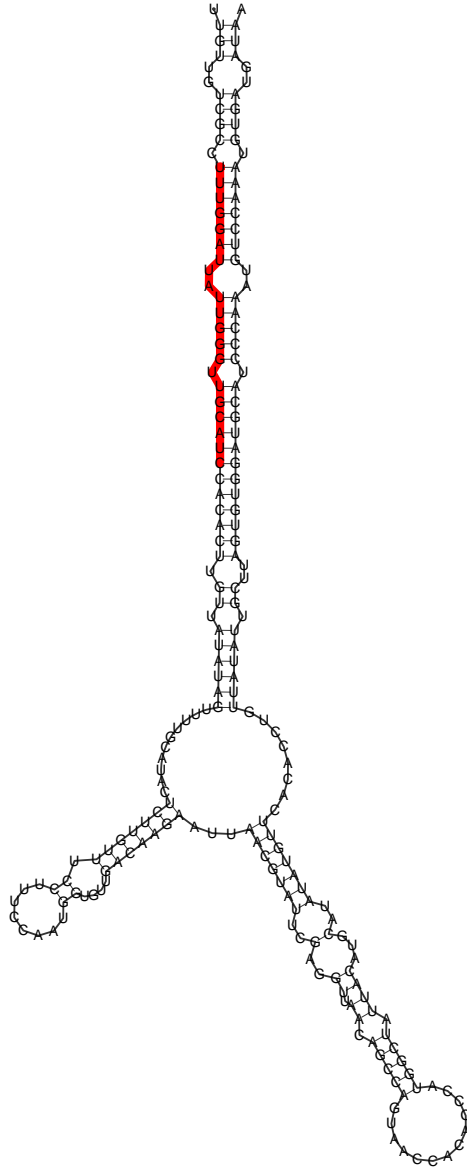

NAME: pab-miR11581  
SEQ:TTGGATTCCTTACAGTAGCC  
LENGTH: 21

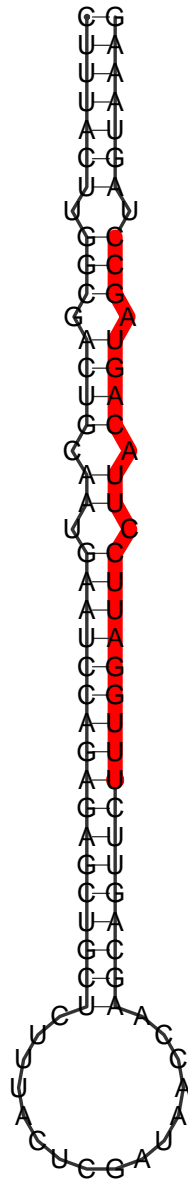

NAME: pab-miR11582  
SEQ:TTTGTCCAACGTAAACGGCA  
LENGTH: 20

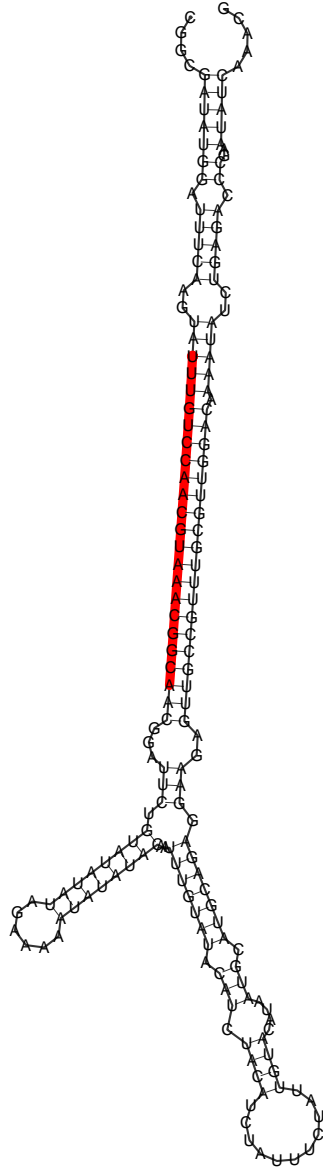

NAME: pab-miR11583a  
SEQ: TTTTCTCTCGTATCGTACACA  
LENGTH: 21

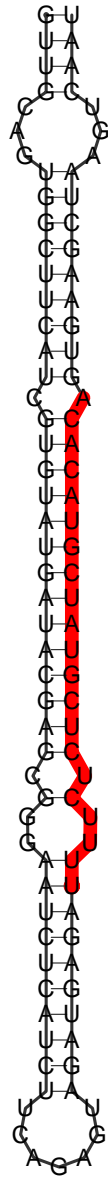



NAME: pab-miR11583b  
SEQ: TTTTCTCTCGTATCGTACACA  
LENGTH: 21

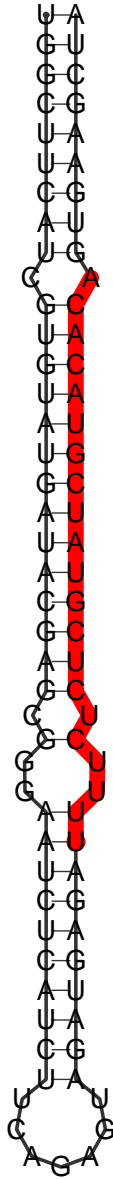

Supplement: supp_msv164_Supplementary_files_S2-Stem_loop_structure_of_novel_miRNAs.pdf [file supp_msv164_Supplementary_files_S2-Stem_loop_structure_of_novel_miRNAs.pdf]
